# Supplementary material for: Trends in the development of miRNA bioinformatics tools
Source: PubMed Central journal article supplement — Brief Bioinform. 2019 Jun 17;20(5):1836–52. doi: 10.1093/bib/bby054 (PMC7414524; doi:10.1093/bib/bby054), 2019-06-17
Supplement: bby054_supp_sf_1.pdf [file bby054_supp_sf_1.pdf]

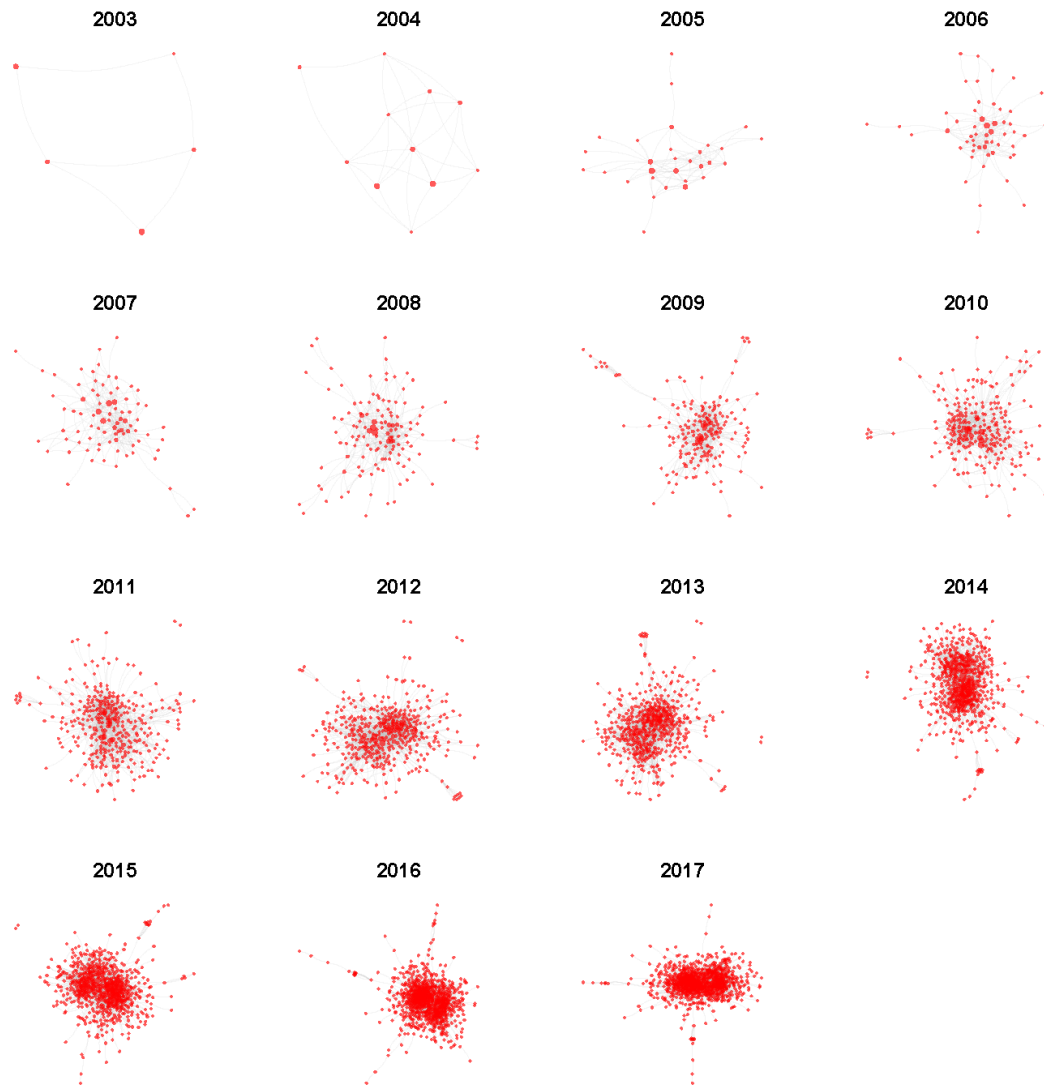

**Supplementary Figure 1. The evolution of miRNA paper citation network by years.** Each red node refers to a paper, the edge represents the citation relationship and the size of node is scaled by PageRank score. The network was drawn with force-directed layout and isolated nodes were removed.
