# Supplementary material for: Trends in the development of miRNA bioinformatics tools
Source: PubMed Central journal article supplement — Brief Bioinform. 2019 Jun 17;20(5):1836–52. doi: 10.1093/bib/bby054 (PMC7414524; doi:10.1093/bib/bby054), 2019-06-17
Supplement: bby054_supp_st_1.pdf [file bby054_supp_st_1.pdf]

**Supplementary Table 1. Review paper information.**

|    | <b>PMID</b> | <b>DOI</b>                    | <b>Categories</b>                         |
|----|-------------|-------------------------------|-------------------------------------------|
| 1  | 29186316    | 10.1093/bib/bbx155            | TAR                                       |
| 2  | 29126230    | 10.1093/bib/bbx148            | IDEN; NGS                                 |
| 3  | 29077860    | 10.1093/bib/bbx137            | REG                                       |
| 4  | 29059285    | 10.1093/bib/bbx136            | IDEN; P                                   |
| 5  | 29045685    | 10.1093/bib/bbx130            | ANN; REG; ML                              |
| 6  | 28925938    | 10.3390/genes8090234          | ANN; ASS                                  |
| 7  | 28786034    | 10.1186/s12284-017-0177-y     | REG; P                                    |
| 8  | 28605404    | 10.1093/bib/bbx063            | TAR; NGS                                  |
| 9  | 28553651    | 10.1155/2017/9139504          | IDEN                                      |
| 10 | 28540688    | 10.1007/978-1-4939-7046-9_16  | TAR; IDEN; ANN; ML                        |
| 11 | 28410145    | 10.2741/4571                  | REG; ASS                                  |
| 12 | 28361256    | 10.1007/s12539-017-0223-x     | IDEN                                      |
| 13 | 28334134    | 10.1093/bfpg/elw042           | TAR; IDEN; ANN; EXP; REG; ML; ASS; NGS; P |
| 14 | 28204845    | 10.1007/s00018-017-2469-1     | TAR                                       |
| 15 | 28035947    | 10.3390/genes8010008          | TAR; IDEN; ANN; EXP; REG; ML; ASS         |
| 16 | 27941681    | 10.3390/ijms17121987          | TAR; NGS                                  |
| 17 | 27918472    | 10.3390/genes7120113          | IDEN; ML                                  |
| 18 | 27551063    | 10.1093/bib/bbw073            | REG                                       |
| 19 | 27284356    | 10.3892/ol.2016.4446          | TAR; IDEN; ANN; EXP; ASS                  |
| 20 | 27273287    | 10.1093/bib/bbw042            | TAR; REG                                  |
| 21 | 27155196    | 10.1093/bfpg/elw015           | TAR; IDEN; ANN; EXP; REG                  |
| 22 | 27021491    | 10.1007/s12539-016-0166-7     | ANN                                       |
| 23 | 26819547    | 10.4137/BMI.S29513            | TAR; ANN                                  |
| 24 | 26813401    | 10.1186/s13059-016-0881-8     | TAR; IDEN; EXP; NGS                       |
| 25 | 26578966    | 10.3389/fphys.2015.00286      | TAR; IDEN; ANN; NGS; P                    |
| 26 | 26578605    | 10.1093/nar/gkv1221           | TAR; IDEN; ANN; EXP; REG; ML; ASS; NGS; P |
| 27 | 26560461    | 10.4137/CIN.S32716            | TAR; IDEN; ANN; EXP; REG                  |
| 28 | 26134276    | 10.1093/bfpg/elv024           | ASS                                       |
| 29 | 26090362    | 10.3389/fbioe.2015.00077      | TAR; IDEN; ANN; EXP; NGS                  |
| 30 | 26059461    | 10.1093/bib/bbv033            | ANN; REG; ASS                             |
| 31 | 26037721    | 10.1007/s00018-015-1922-2     | TAR; REG                                  |
| 32 | 25957774    | 10.1016/j.febslet.2015.04.054 | TAR; IDEN                                 |
| 33 | 25914300    | 10.1002/wrna.1286             | TAR; REG                                  |
| 34 | 25888698    | 10.1093/bib/bbv019            | EXP; NGS                                  |
| 35 | 25674563    | 10.3389/fbioe.2015.00007      | IDEN; NGS                                 |
| 36 | 25577381    | 10.1007/978-1-4939-2291-8_13  | TAR; NGS                                  |
| 37 | 25515586    | 10.1002/wrna.1274             | TAR; IDEN; ANN; NGS                       |
| 38 | 25486579    | 10.1016/j.yjmcc.2014.11.027   | TAR; IDEN; REG; ASS                       |
| 39 | 25450261    | 10.1016/j.addr.2014.10.030    | TAR; IDEN; EXP; ML; ASS                   |
| 40 | 25153283    | 10.3390/genes5030671          | TAR; EXP                                  |
| 41 | 24984849    | 10.1002/0471142727.mb1908s107 | TAR; ANN; EXP                             |
| 42 | 24885295    | 10.1186/1471-2164-15-348      | TAR; P                                    |
| 43 | 24832228    | 10.3390/biology1020297        | IDEN; NGS; P                              |
| 44 | 24639171    | 10.1007/978-1-62703-709-9_20  | IDEN; ML                                  |
| 45 | 24600468    | 10.3389/fgene.2014.00023      | TAR; ML                                   |

|    | PMID     | DOI                               | Categories               |
|----|----------|-----------------------------------|--------------------------|
| 46 | 24525131 | 10.1016/j.bbrc.2014.01.181        | TAR                      |
| 47 | 24507415 | 10.1186/1752-0509-8-14            | REG                      |
| 48 | 24459110 | 10.1002/wrna.1217                 | TAR; EXP; REG            |
| 49 | 24272439 | 10.1007/978-1-62703-748-8_12      | TAR; ML                  |
| 50 | 24272437 | 10.1007/978-1-62703-748-8_10      | IDEN; ML                 |
| 51 | 24084238 | 10.1504/IJBRA.2013.056620         | TAR                      |
| 52 | 24082822 | 10.2174/1389202911314020005       | TAR                      |
| 53 | 23720668 | 10.3389/fgene.2013.00081          | TAR; IDEN; ML            |
| 54 | 23591837 | 10.3390/ijms14048179              | TAR                      |
| 55 | 23518312 | 10.1016/j.clinbiochem.2013.03.006 | TAR; IDEN; ANN; EXP; ASS |
| 56 | 23501016 | 10.1016/j.jbi.2013.02.002         | TAR; IDEN; ML            |
| 57 | 23377976 | 10.1007/978-94-007-5590-1_12      | TAR; ANN; EXP; ML        |
| 58 | 23377967 | 10.1007/978-94-007-5590-1_3       | TAR                      |
| 59 | 23334922 | 10.1093/bib/bbs010                | IDEN; NGS                |
| 60 | 23214133 | not applicable                    | TAR; IDEN; ANN; EXP; REG |
| 61 | 23200136 | 10.1016/j.gpb.2012.09.003         | TAR; P                   |
| 62 | 23200135 | 10.1016/j.gpb.2012.10.001         | TAR                      |
| 63 | 23096922 | 10.4238/2012.October.17.4         | IDEN                     |
| 64 | 23087705 | 10.3389/fgene.2012.00209          | IDEN; ML                 |
| 65 | 23007502 | 10.1007/978-1-62703-083-0_8       | TAR; ANN                 |
| 66 | 22995832 | 10.4161/rna.22035                 | ANN; EXP                 |
| 67 | 22991327 | 10.1002/wrna.1134                 | TAR; IDEN; ANN           |
| 68 | 22836911 | 10.1038/leu.2012.179              | TAR                      |
| 69 | 22162940 | 10.2147/OAB.S6902                 | TAR                      |
| 70 | 22077698 | 10.1111/j.1365-2443.2011.01564.x  | TAR; IDEN                |
| 71 | 21607762 | 10.1007/s12033-011-9416-4         | IDEN; ML; ASS            |
| 72 | 21504869 | 10.1186/1479-7364-5-3-192         | ANN                      |
| 73 | 21342132 | 10.2174/156652411794859250        | TAR                      |
| 74 | 20858738 | 10.1093/bib/bbq065                | TAR; P                   |
| 75 | 20177143 | 10.3858/emm.2010.42.032           | TAR                      |
| 76 | 20079866 | 10.1016/j.semcd.2010.01.004       | TAR; ML                  |
| 77 | 20016969 | 10.1007/s11427-009-0159-4         | TAR                      |
| 78 | 20012966 | 10.1007/s00335-009-9241-2         | TAR; IDEN; ML            |
| 79 | 19789267 | 10.1093/bioinformatics/btp565     | TAR                      |
| 80 | 19575477 | 10.1002/0471142727.mb1908s87      | TAR; ANN                 |
| 81 | 19295136 | 10.1093/nar/gkp145                | TAR; IDEN; ML            |
| 82 | 19250313 | 10.1111/j.1742-4658.2009.06933.x  | TAR; IDEN; ANN; ML       |
| 83 | 18550489 | not applicable                    | IDEN; ML                 |
| 84 | 17720479 | 10.1016/S0076-6879(07)27004-1     | TAR                      |
| 85 | 17532529 | 10.1016/j.drudis.2007.04.002      | TAR                      |
| 86 | 17504029 | 10.1089/dna.2006.0551             | TAR; IDEN; ML            |
| 87 | 17504028 | 10.1089/dna.2006.0549             | TAR; IDEN                |
| 88 | 17465893 | 10.1089/dna.2006.0566             | TAR                      |
| 89 | 17123865 | 10.1016/j.compbiochem.2006.08.00  | TAR; IDEN                |
| 90 | 17060911 | 10.1038/nmeth954                  | IDEN                     |
| 91 | 16847881 | 10.1002/bdrc.20067                | TAR; IDEN                |
| 92 | 16736023 | 10.1038/ng1798                    | TAR                      |

|    | <b>PMID</b> | <b>DOI</b>                    | <b>Categories</b> |
|----|-------------|-------------------------------|-------------------|
| 93 | 16736019    | 10.1038/ng1794                | IDEN              |
| 94 | 16393143    | 10.1016/S1672-0229(05)03011-1 | TAR; IDEN         |
| 95 | 15837603    | 10.1016/S1359-6446(05)03399-4 | TAR; IDEN         |

**Abbreviations:** TAR, Target; IDEN, Identification; ANN, Annotation/Knowledge; EXP, Expression; REG, Regulation Network; ML, Machine-Learning; ASS, Association/biomarker; NGS, Next generation sequencing; P, Plant
