# Supplementary material for: Trends in the development of miRNA bioinformatics tools
Source: PubMed Central journal article supplement — Brief Bioinform. 2019 Jun 17;20(5):1836–52. doi: 10.1093/bib/bby054 (PMC7414524; doi:10.1093/bib/bby054), 2019-06-17
Supplement: bby054_supp_st_2.pdf [file bby054_supp_st_2.pdf]

**Supplementary Table 2. miRNA tools related papers with rank criterions.**

|    | <b>PMID</b> | <b>DOI</b>                    | <b>Name</b>                            | <b>Year</b> | <b>Citation</b> | <b>Pagerank</b> |
|----|-------------|-------------------------------|----------------------------------------|-------------|-----------------|-----------------|
| 1  | 12592000    | not applicable                | Rfam                                   | 2003        | 504             | 0.031836087     |
| 2  | 12624257    | 10.1126/science.1080372       | MiRscan                                | 2003        | 330             | 0.028762044     |
| 3  | 12672692    | 10.1101/gad.1074403           | MiRscan                                | 2003        | 373             | 0.022887747     |
| 4  | 14681370    | 10.1093/nar/gkh023            | miRBase                                | 2004        | 669             | 0.020695977     |
| 5  | 15652477    | 10.1016/j.cell.2004.12.035    | TargetScan                             | 2005        | 3806            | 0.020509513     |
| 6  | 14691535    | 10.1371/journal.pbio.0000060  | miRNA - Target Gene Prediction at EMBL | 2003        | 248             | 0.018105966     |
| 7  | 16381832    | 10.1093/nar/gkj112            | miRBase                                | 2006        | 1420            | 0.016086438     |
| 8  | 14709173    | 10.1186/gb-2003-5-1-r1        | miRanda                                | 2003        | 752             | 0.0156906       |
| 9  | 15806104    | 10.1038/ng1536                | PicTar                                 | 2005        | 1670            | 0.015671313     |
| 10 | 12824340    | not applicable                | ViennaRNA                              | 2003        | 660             | 0.015377668     |
| 11 | 17991681    | 10.1093/nar/gkm952            | miRBase                                | 2008        | 1590            | 0.015292701     |
| 12 | 15383676    | 10.1261/rna.5248604           | RNAhybrid                              | 2004        | 660             | 0.013143158     |
| 13 | 15502875    | 10.1371/journal.pbio.0020363  | miRanda                                | 2004        | 1099            | 0.012016919     |
| 14 | 21037258    | 10.1093/nar/gkq1027           | miRBase                                | 2011        | 1329            | 0.010940006     |
| 15 | 15723116    | 10.1371/journal.pbio.0030085  | miRNA - Target Gene Prediction at EMBL | 2005        | 717             | 0.00930926      |
| 16 | 17604727    | 10.1016/j.cell.2007.04.040    | smiRNadb                               | 2007        | 1276            | 0.008637472     |
| 17 | 17612493    | 10.1016/j.molcel.2007.06.017  | TargetScan                             | 2007        | 1472            | 0.008479724     |
| 18 | 16373484    | 10.1261/rna.2239606           | DIANA-TarBase                          | 2006        | 208             | 0.008047815     |
| 19 | 18955434    | 10.1101/gr.082701.108         | TargetScan                             | 2009        | 2078            | 0.007634906     |
| 20 | 18996891    | 10.1093/nar/gkn851            | miRecords                              | 2009        | 425             | 0.007422697     |
| 21 | 17893677    | 10.1038/ng2135                | PITA                                   | 2007        | 773             | 0.006929314     |
| 22 | 19261174    | 10.1186/gb-2009-10-3-r25      | Bowtie                                 | 2009        | 5963            | 0.006654577     |
| 23 | 18392026    | 10.1038/nbt1394               | miRDeep                                | 2008        | 411             | 0.006257647     |
| 24 | 15608160    | 10.1093/nar/gki081            | Rfam                                   | 2005        | 506             | 0.006061965     |
| 25 | 18927107    | 10.1093/nar/gkn714            | miR2Disease                            | 2009        | 313             | 0.005967903     |
| 26 | 18158296    | 10.1093/nar/gkm995            | miRanda                                | 2008        | 768             | 0.00547519      |
| 27 | 24275495    | 10.1093/nar/gkt1181           | miRBase                                | 2014        | 976             | 0.004945145     |
| 28 | 18227114    | 10.1093/bioinformatics/btn025 | SOAP                                   | 2008        | 710             | 0.00480476      |
| 29 | 15665081    | 10.1073/pnas.0409169102       | RNAz                                   | 2005        | 266             | 0.004532453     |
| 30 | 18714091    | 10.1101/gr.078212.108         | Maq                                    | 2008        | 1112            | 0.004502425     |
| 31 | 18957447    | 10.1093/nar/gkn809            | DIANA-TarBase                          | 2009        | 171             | 0.004266482     |
| 32 | 16990141    | 10.1016/j.cell.2006.07.031    | RNA22                                  | 2006        | 577             | 0.003978746     |
| 33 | 16957372    | 10.1385/1-59745-123-1:129     | miRBase                                | 2006        | 211             | 0.003956152     |
| 34 | 16845047    | 10.1093/nar/gkl243            | RNAhybrid                              | 2006        | 336             | 0.003637339     |
| 35 | 21071411    | 10.1093/nar/gkq1107           | miRTarBase                             | 2011        | 315             | 0.003382306     |
| 36 | 15851028    | 10.1016/j.cell.2005.04.004    | TargetFinder                           | 2005        | 652             | 0.003261493     |
| 37 | 16103902    | 10.1371/journal.pcbi.0010013  | PicTar                                 | 2005        | 151             | 0.003144453     |
| 38 | 17331257    | 10.1186/1471-2105-8-69        | EIMMo                                  | 2007        | 128             | 0.003099406     |
| 39 | 17108354    | 10.1093/nar/gki904            | DIANA-miRGen                           | 2007        | 106             | 0.003097238     |
| 40 | 16458514    | 10.1016/j.cub.2006.01.050     | PicTar                                 | 2006        | 164             | 0.002990981     |
| 41 | 17942429    | 10.1093/nar/gkm829            | miRGator                               | 2008        | 64              | 0.00298894      |
| 42 | 18923704    | 10.1371/journal.pone.0003420  | HMDD                                   | 2008        | 236             | 0.002870662     |
| 43 | 18953034    | 10.1093/nar/gkn766            | Rfam                                   | 2009        | 349             | 0.002589527     |
| 44 | 18945806    | 10.1261/rna.1200508           | Rfam                                   | 2008        | 28              | 0.002533127     |
| 45 | 17872505    | 10.1261/rna.768207            | targetrank                             | 2007        | 136             | 0.002499858     |

|    | <b>PMID</b> | <b>DOI</b>                    | <b>Name</b>                            | <b>Year</b> | <b>Citation</b> | <b>Pagerank</b> |
|----|-------------|-------------------------------|----------------------------------------|-------------|-----------------|-----------------|
| 46 | 24304892    | 10.1093/nar/gkt1266           | miRTarBase                             | 2014        | 239             | 0.002487866     |
| 47 | 21037263    | 10.1093/nar/gkq1056           | starBase                               | 2011        | 194             | 0.002456749     |
| 48 | 18029362    | 10.1093/nar/gkm1012           | miRNAMap                               | 2008        | 98              | 0.002445709     |
| 49 | 20799968    | 10.1186/gb-2010-11-8-r90      | miRanda                                | 2010        | 428             | 0.002363933     |
| 50 | 19406924    | 10.1093/nar/gkp292            | DIANA-microT                           | 2009        | 217             | 0.002317356     |
| 51 | 19433510    | 10.1093/nar/gkp347            | miRanalyzer                            | 2009        | 110             | 0.002254742     |
| 52 | 16381831    | 10.1093/nar/gkj135            | miRNAMap                               | 2006        | 67              | 0.002240115     |
| 53 | 24297251    | 10.1093/nar/gkt1248           | starBase                               | 2014        | 269             | 0.00223988      |
| 54 | 22135297    | 10.1093/nar/gkr1161           | DIANA-TarBase                          | 2012        | 219             | 0.002205706     |
| 55 | 15001477    | 10.1093/bioinformatics/bth164 | GenScript                              | 2004        | 20              | 0.00214599      |
| 56 | 22115189    | 10.1186/1748-7188-6-26        | ViennaRNA                              | 2011        | 506             | 0.002140237     |
| 57 | 15608158    | 10.1093/nar/gki041            | NONCODE                                | 2005        | 82              | 0.002115506     |
| 58 | 15158471    | 10.1016/j.bbrc.2004.04.181    | siSearch                               | 2004        | 36              | 0.002102661     |
| 59 | 18048393    | 10.1093/bioinformatics/btm595 | miRDB                                  | 2008        | 223             | 0.002086002     |
| 60 | 17538623    | 10.1038/nature05903           | cre-siRNA                              | 2007        | 150             | 0.002051212     |
| 61 | 16381612    | 10.1186/1471-2105-6-310       | mirnasvm                               | 2005        | 129             | 0.002005839     |
| 62 | 19786497    | 10.1093/nar/gkp803            | TransmiR                               | 2010        | 130             | 0.001998957     |
| 63 | 19810033    | 10.1002/pmic.200900351        | ExoCarta                               | 2009        | 206             | 0.001983647     |
| 64 | 21062808    | 10.1093/nar/gkq1129           | Rfam                                   | 2011        | 206             | 0.001971549     |
| 65 | 15980566    | 10.1093/nar/gki364            | MicroInspector                         | 2005        | 82              | 0.001960632     |
| 66 | 21911355    | 10.1093/nar/gkr688            | miRDeep                                | 2012        | 356             | 0.001951051     |
| 67 | 17478515    | 10.1093/nar/gkm226            | g:Profiler                             | 2007        | 229             | 0.001926795     |
| 68 | 15980476    | 10.1093/nar/gki594            | Bioinformatics Links Directory         | 2005        | 14              | 0.001923249     |
| 69 | 15215364    | 10.1093/nar/gkh442            | siDirect                               | 2004        | 62              | 0.0018807       |
| 70 | 18438400    | 10.1038/nbt1404               | RNAxs                                  | 2008        | 88              | 0.001860147     |
| 71 | 15608278    | 10.1093/nar/gki127            | ASRP                                   | 2005        | 90              | 0.001840582     |
| 72 | 17145715    | 10.1093/nar/gki926            | RNAdb                                  | 2007        | 57              | 0.001835788     |
| 73 | 15272084    | 10.1073/pnas.0404025101       | Arabidopsis Small RNA Project Database | 2004        | 124             | 0.001818513     |
| 74 | 19451168    | 10.1093/bioinformatics/btp324 | BWA                                    | 2009        | 6788            | 0.001814492     |
| 75 | 15608161    | 10.1093/nar/gki089            | RNAdb                                  | 2005        | 60              | 0.001804553     |
| 76 | 18426918    | 10.1261/rna.965408            | miRDB                                  | 2008        | 267             | 0.001761022     |
| 77 | 15980567    | 10.1093/nar/gki383            | miRU                                   | 2005        | 108             | 0.001708635     |
| 78 | 18026111    | 10.1038/nmeth1130             | GenMiR++                               | 2007        | 157             | 0.001705947     |
| 79 | 15980541    | 10.1093/nar/gki468            | E-RNAi                                 | 2005        | 29              | 0.001705741     |
| 80 | 17299599    | 10.1371/journal.pone.0000219  | TargetFinder                           | 2007        | 383             | 0.001584168     |
| 81 | 16381827    | 10.1093/nar/gkj093            | Argonaute                              | 2006        | 26              | 0.001575292     |
| 82 | 20370911    | 10.1186/gb-2010-11-4-r39      | miRTRAP                                | 2010        | 34              | 0.001526883     |
| 83 | 15987789    | 10.1093/nar/gki668            | ProMiR                                 | 2005        | 66              | 0.001521543     |
| 84 | 17553836    | 10.1093/nar/gkm368            | miPred                                 | 2007        | 138             | 0.001488786     |
| 85 | 22285563    | 10.1093/bioinformatics/bts043 | DIANA-microT                           | 2012        | 101             | 0.001487194     |
| 86 | 15215362    | 10.1093/nar/gkh408            | DEQOR                                  | 2004        | 48              | 0.001477821     |
| 87 | 15632092    | 10.1101/gr.2908205            | miRNA Precursor Candidates for Arabid  | 2005        | 100             | 0.001476373     |
| 88 | 19821977    | 10.1186/1471-2105-10-328      | miRExpress                             | 2009        | 75              | 0.001465985     |
| 89 | 22135294    | 10.1093/nar/gkr1175           | NONCODE                                | 2012        | 111             | 0.001446395     |
| 90 | 15928346    | 10.1261/rna.7290705           | TargetBoost                            | 2005        | 31              | 0.001440395     |
| 91 | 21622958    | 10.1093/nar/gkr319            | psRNATarget                            | 2011        | 381             | 0.001419564     |
| 92 | 19435746    | 10.1093/bioinformatics/btp299 | DIANA-miRPath                          | 2009        | 115             | 0.00140043      |

|     | <b>PMID</b> | <b>DOI</b>                    | <b>Name</b>                             | <b>Year</b> | <b>Citation</b> | <b>Pagerank</b> |
|-----|-------------|-------------------------------|-----------------------------------------|-------------|-----------------|-----------------|
| 93  | 18940824    | 10.1093/bioinformatics/btn544 | IntaRNA                                 | 2008        | 131             | 0.001394053     |
| 94  | 21515631    | 10.1093/nar/gkr247            | miRanalyzer                             | 2011        | 104             | 0.001386068     |
| 95  | 21909094    | 10.1038/nsmb.2115             | TargetScan                              | 2011        | 303             | 0.001384688     |
| 96  | 18713789    | 10.1093/bioinformatics/btn428 | UEA sRNA toolkit                        | 2008        | 103             | 0.001370933     |
| 97  | 19850714    | 10.1093/nar/gkp888            | DIANA-miRGen                            | 2010        | 55              | 0.001360224     |
| 98  | 21605702    | 10.1016/j.jbi.2011.05.002     | miRWalk                                 | 2011        | 496             | 0.001359172     |
| 99  | 18812437    | 10.1261/rna.1188208           | SigTerms                                | 2008        | 61              | 0.00135733      |
| 100 | 16274478    | 10.1186/1471-2105-6-267       | miR-abela                               | 2005        | 85              | 0.001350986     |
| 101 | 15994192    | 10.1093/bioinformatics/bti562 | MiRAlign                                | 2005        | 86              | 0.001350776     |
| 102 | 16845014    | 10.1093/nar/gkl379            | Bioinformatics Links Directory          | 2006        | 10              | 0.001349648     |
| 103 | 15345049    | 10.1186/gb-2004-5-9-r65       | MPSS                                    | 2004        | 123             | 0.001347244     |
| 104 | 20089154    | 10.1186/gb-2010-11-1-r6       | PhenomiR                                | 2010        | 61              | 0.001336298     |
| 105 | 26267216    | 10.7554/eLife.05005           | TargetScan                              | 2015        | 360             | 0.001328247     |
| 106 | 19966272    | 10.1093/nar/gkp943            | deepBase                                | 2010        | 60              | 0.001325793     |
| 107 | 19765283    | 10.1186/1471-2105-10-295      | DIANA-microT                            | 2009        | 139             | 0.001289834     |
| 108 | 20122185    | 10.1186/1471-2105-11-S1-S14   | soybean_mirna                           | 2010        | 42              | 0.001281111     |
| 109 | 15215365    | 10.1093/nar/gkh366            | siRNA Selection Server                  | 2004        | 102             | 0.001277799     |
| 110 | 23193281    | 10.1093/nar/gks1246           | DIANA-LncBase                           | 2013        | 70              | 0.001246033     |
| 111 | 17452347    | 10.1093/nar/gkm222            | RNAz                                    | 2007        | 40              | 0.001225835     |
| 112 | 20233441    | 10.1186/1471-2105-11-135      | miRSel                                  | 2010        | 28              | 0.001221287     |
| 113 | 20478827    | 10.1093/nar/gkq393            | mirTools                                | 2010        | 46              | 0.001220421     |
| 114 | 16873472    | 10.1093/bioinformatics/btl257 | RNAmicro                                | 2006        | 58              | 0.001219208     |
| 115 | 20591903    | 10.1093/bioinformatics/btq329 | MIRENA                                  | 2010        | 48              | 0.001203457     |
| 116 | 21989406    | 10.1093/nar/gkr828            | ExoCarta                                | 2012        | 191             | 0.001195766     |
| 117 | 20959292    | 10.1093/nar/gkq937            | PED                                     | 2011        | 10              | 0.001189178     |
| 118 | 18000000    | 10.1093/nar/gkm1011           | NONCODE                                 | 2008        | 47              | 0.0011697       |
| 119 | 18948287    | 10.1093/nar/gkn805            | fRNadb                                  | 2009        | 58              | 0.001164162     |
| 120 | 16443930    | 10.1093/bioinformatics/btl026 | siRecords                               | 2006        | 14              | 0.001163658     |
| 121 | 24285305    | 10.1093/nar/gkt1222           | NONCODE                                 | 2014        | 128             | 0.001137636     |
| 122 | 20161787    | 10.1371/journal.pone.0009171  | DIANA-mirExTra                          | 2010        | 35              | 0.001134938     |
| 123 | 16869968    | 10.1186/gb-2006-7-7-R66       | cellHTS                                 | 2006        | 113             | 0.001132319     |
| 124 | 20008100    | 10.1093/nar/gkp1127           | SeqBuster                               | 2010        | 46              | 0.00112395      |
| 125 | 16845048    | 10.1093/nar/gkl321            | ProMiR                                  | 2006        | 15              | 0.001123669     |
| 126 | 16381918    | 10.1093/nar/gkj114            | FlyRNAi                                 | 2006        | 38              | 0.001116497     |
| 127 | 26590260    | 10.1093/nar/gkv1258           | miRTarBase                              | 2016        | 160             | 0.0011056       |
| 128 | 25858286    | 10.1093/database/bav035       | miRGate                                 | 2015        | 10              | 0.001105429     |
| 129 | 20439255    | 10.1093/bioinformatics/btq241 | MISIM                                   | 2010        | 53              | 0.001102587     |
| 130 | 16978421    | 10.1186/1471-2105-7-411       | miTarget                                | 2006        | 62              | 0.001081618     |
| 131 | 20478825    | 10.1093/nar/gkq392            | DSAP                                    | 2010        | 33              | 0.001081141     |
| 132 | 16381968    | 10.1093/nar/gkj077            | MPSS                                    | 2006        | 89              | 0.001081094     |
| 133 | 20801911    | 10.1093/bioinformatics/btq493 | miRNAkey                                | 2010        | 32              | 0.001073223     |
| 134 | 19420067    | 10.1093/nar/gkp294            | MMIA                                    | 2009        | 69              | 0.001072819     |
| 135 | 14681444    | 10.1093/nar/gkh110            | RNAiDB                                  | 2004        | 29              | 0.001067272     |
| 136 | 20731828    | 10.1186/1471-2105-11-435      | CircuitsDB                              | 2010        | 36              | 0.001060719     |
| 137 | 17881367    | 10.1093/nar/gkm696            | piRNABank                               | 2008        | 91              | 0.001054448     |
| 138 | 20157481    | 10.1093/database/bap008       | miRo                                    | 2009        | 40              | 0.001051353     |
| 139 | 17267435    | 10.1093/bioinformatics/btm026 | De Novo SVM Classification of Precursor | 2007        | 66              | 0.001050958     |

|     | <b>PMID</b> | <b>DOI</b>                    | <b>Name</b>                              | <b>Year</b> | <b>Citation</b> | <b>Pagerank</b> |
|-----|-------------|-------------------------------|------------------------------------------|-------------|-----------------|-----------------|
| 140 | 17925304    | 10.1093/bioinformatics/btm484 | NBmiRTar                                 | 2007        | 36              | 0.001048938     |
| 141 | 14681441    | 10.1093/nar/gkh011            | maizeGDB                                 | 2004        | 51              | 0.001048846     |
| 142 | 15215366    | 10.1093/nar/gkh449            | Sfold                                    | 2004        | 137             | 0.001044844     |
| 143 | 25416803    | 10.1093/nar/gku1215           | DIANA-TarBase                            | 2015        | 121             | 0.0010427       |
| 144 | 18945703    | 10.1093/nar/gkn702            | UCbase & miRfunc                         | 2009        | 14              | 0.001039435     |
| 145 | 23680784    | 10.1093/nar/gkt393            | DIANA-microT                             | 2013        | 139             | 0.001032136     |
| 146 | 15608157    | 10.1093/nar/gki131            | HuSiDa                                   | 2005        | 12              | 0.001023824     |
| 147 | 20205188    | 10.1002/0471250953.bi1209s29  | miRBase                                  | 2010        | 53              | 0.001022622     |
| 148 | 18467344    | 10.1093/bioinformatics/btn223 | PatMaN                                   | 2008        | 64              | 0.001014536     |
| 149 | 17169992    | 10.1093/nar/gkl1065           | More complete gene silencing by fewer si | 2007        | 19              | 0.001010774     |
| 150 | 22086949    | 10.1093/nar/gkr1007           | DoRiNA                                   | 2012        | 70              | 0.001008095     |
| 151 | 19497933    | 10.1093/bioinformatics/btp336 | SOAP                                     | 2009        | 1064            | 0.001006705     |
| 152 | 23193297    | 10.1093/nar/gks1168           | miRGator                                 | 2013        | 32              | 0.00100517      |
| 153 | 23066107    | 10.1093/nar/gks937            | TSGene                                   | 2013        | 116             | 0.000991499     |
| 154 | 23325622    | 10.1093/bioinformatics/btt019 | CluePedia                                | 2013        | 81              | 0.000989933     |
| 155 | 18424795    | 10.1093/nar/gkn188            | ViennaRNA                                | 2008        | 447             | 0.000989196     |
| 156 | 22649059    | 10.1093/nar/gks494            | DIANA-miRPath                            | 2012        | 198             | 0.000985758     |
| 157 | 16543277    | 10.1093/bioinformatics/btl094 | BayesMiRNAfind                           | 2006        | 47              | 0.000981828     |
| 158 | 21851591    | 10.1186/gb-2011-12-8-r79      | PARalyzer                                | 2011        | 110             | 0.000980147     |
| 159 | 17105718    | 10.1093/bioinformatics/btl570 | Reliable prediction of Drosha processing | 2007        | 36              | 0.000979934     |
| 160 | 19233894    | 10.1093/bioinformatics/btp107 | microPred                                | 2009        | 58              | 0.000978386     |
| 161 | 19160516    | 10.1038/nmeth.1247            | mirWIP                                   | 2008        | 94              | 0.000973914     |
| 162 | 18434344    | 10.1093/bioinformatics/btn193 | RNAplex                                  | 2008        | 60              | 0.000973637     |
| 163 | 16357030    | 10.1093/bioinformatics/btk008 | CMfinder                                 | 2006        | 122             | 0.000971224     |
| 164 | 19808935    | 10.1093/nar/gkp818            | PMRD                                     | 2010        | 82              | 0.000971105     |
| 165 | 18460544    | 10.1093/nar/gkn230            | GraphWeb                                 | 2008        | 31              | 0.00096407      |
| 166 | 19802588    | 10.1007/978-1-60327-005-2_4   | TargetFinder                             | 2010        | 31              | 0.000963205     |
| 167 | 22045659    | 10.1002/humu.21641            | miRNASNP                                 | 2012        | 90              | 0.000960329     |
| 168 | 24194601    | 10.1093/nar/gkt1023           | HMDD                                     | 2014        | 83              | 0.000959716     |
| 169 | 19420064    | 10.1093/nar/gkp313            | GeneSet2miRNA                            | 2009        | 21              | 0.000950487     |
| 170 | 17586821    | 10.1093/nar/gkm459            | Bioinformatics Links Directory           | 2007        | 6               | 0.000947122     |
| 171 | 23325619    | 10.1093/bioinformatics/btt014 | miRCancer                                | 2013        | 57              | 0.000939684     |
| 172 | 23125362    | 10.1093/nar/gks1005           | Rfam                                     | 2013        | 294             | 0.000937328     |
| 173 | 16381889    | 10.1093/nar/gkj159            | Transterm                                | 2006        | 14              | 0.00092465      |
| 174 | 19900972    | 10.1093/nar/gkp945            | HLungDB                                  | 2010        | 18              | 0.000924405     |
| 175 | 20809528    | 10.1002/humu.21349            | MicroSNiPer                              | 2010        | 44              | 0.000924168     |
| 176 | 19692556    | 10.1093/bioinformatics/btp503 | TargetMiner                              | 2009        | 59              | 0.000915097     |
| 177 | 17099235    | 10.1093/nar/gkl797            | PolymiRTS                                | 2007        | 65              | 0.000911624     |
| 178 | 25392425    | 10.1093/nar/gku1063           | Rfam                                     | 2015        | 196             | 0.000902323     |
| 179 | 22080514    | 10.1093/nar/gkr1026           | PolymiRTS                                | 2012        | 47              | 0.000894615     |
| 180 | 21685098    | 10.1093/bioinformatics/btr206 | SNMNMF                                   | 2011        | 54              | 0.00089344      |
| 181 | 23221645    | 10.1093/nar/gks1187           | miRDeep*                                 | 2013        | 37              | 0.000892068     |
| 182 | 17999994    | 10.1093/nar/gkm997            | ASRP                                     | 2008        | 42              | 0.000889864     |
| 183 | 17254305    | 10.1186/1471-2105-7-S5-S20    | MicroTar                                 | 2006        | 25              | 0.000885541     |
| 184 | 22086956    | 10.1093/nar/gkr1058           | SEQanswers                               | 2012        | 17              | 0.00088375      |
| 185 | 20484379    | 10.1093/nar/gkq423            | MAGIA                                    | 2010        | 55              | 0.00087961      |
| 186 | 15564304    | 10.1093/bioinformatics/bti155 | siDirect                                 | 2005        | 17              | 0.000875747     |

|     | <b>PMID</b> | <b>DOI</b>                    | <b>Name</b>                    | <b>Year</b> | <b>Citation</b> | <b>Pagerank</b> |
|-----|-------------|-------------------------------|--------------------------------|-------------|-----------------|-----------------|
| 187 | 20230624    | 10.1186/1471-2105-11-129      | RNAstructure                   | 2010        | 289             | 0.00087367      |
| 188 | 19906729    | 10.1093/nar/gkp926            | Patrocles                      | 2010        | 55              | 0.000872186     |
| 189 | 19750212    | 10.1371/journal.pcbi.1000502  | segemehl                       | 2009        | 155             | 0.000870311     |
| 190 | 25977294    | 10.1093/nar/gkv403            | DIANA-miRPath                  | 2015        | 105             | 0.000869328     |
| 191 | 22369646    | 10.1186/1471-2164-13-S1-S15   | SoyKB                          | 2012        | 23              | 0.0008636       |
| 192 | 19059941    | 10.1093/bioinformatics/btn628 | mirclust                       | 2009        | 20              | 0.00085864      |
| 193 | 20576699    | 10.1093/nar/gkq570            | FAME                           | 2010        | 35              | 0.000855492     |
| 194 | 18812516    | 10.1073/pnas.0803230105       | SiteSifter                     | 2008        | 201             | 0.000853552     |
| 195 | 16381834    | 10.1093/nar/gkj025            | NPInter                        | 2006        | 19              | 0.00085307      |
| 196 | 21622957    | 10.1093/nar/gkr357            | DARIO                          | 2011        | 22              | 0.000851451     |
| 197 | 17137497    | 10.1186/1471-2105-7-520       | DSIR                           | 2006        | 79              | 0.000850398     |
| 198 | 23161675    | 10.1093/nar/gks1060           | ChIPBase                       | 2013        | 92              | 0.000848658     |
| 199 | 21551220    | 10.1093/nar/gkr294            | DIANA-microT                   | 2011        | 39              | 0.000845178     |
| 200 | 21143814    | 10.1186/1471-2164-11-S4-S5    | dbDEMC                         | 2010        | 30              | 0.000843592     |
| 201 | 17099231    | 10.1093/nar/gkl837            | fRNadb                         | 2007        | 66              | 0.000837241     |
| 202 | 19218350    | 10.1093/bioinformatics/btp087 | PASS                           | 2009        | 51              | 0.000829073     |
| 203 | 21558324    | 10.1093/nar/gkr276            | mirConnX                       | 2011        | 50              | 0.000828463     |
| 204 | 21504621    | 10.1186/1471-2105-12-107      | MiRPara                        | 2011        | 38              | 0.000825985     |
| 205 | 22718787    | 10.1093/bioinformatics/bts344 | miRCode                        | 2012        | 70              | 0.000817687     |
| 206 | 19478011    | 10.1093/bioinformatics/btp212 | piRNA                          | 2009        | 22              | 0.000815701     |
| 207 | 17895272    | 10.1093/bioinformatics/btm464 | SnoReport                      | 2008        | 52              | 0.000811156     |
| 208 | 24009883    | 10.3402/jev.v1i0.18374        | ExoCarta                       | 2012        | 66              | 0.000811039     |
| 209 | 21775303    | 10.1093/bioinformatics/btr430 | miRDeep-P                      | 2011        | 59              | 0.000808125     |
| 210 | 18158128    | 10.1016/j.ymeth.2007.10.002   | smiRNA-annotation              | 2008        | 35              | 0.000807555     |
| 211 | 23334102    | 10.1038/nmeth.2341            | MIRZA                          | 2013        | 46              | 0.000803707     |
| 212 | 21984757    | 10.1093/bioinformatics/btr556 | miREnvironment                 | 2011        | 20              | 0.000802687     |
| 213 | 22645320    | 10.1093/nar/gks395            | dChip-GemiNI                   | 2012        | 28              | 0.000799975     |
| 214 | 22618880    | 10.1093/nar/gks460            | MAGIA                          | 2012        | 36              | 0.00079886      |
| 215 | 22303453    | 10.1371/journal.pone.0030737  | miRNA SNiPer                   | 2012        | 22              | 0.000798103     |
| 216 | 19181683    | 10.1093/bioinformatics/btp059 | CORNA                          | 2009        | 27              | 0.000797518     |
| 217 | 23331499    | 10.1186/1752-0509-7-7         | Signalink                      | 2013        | 38              | 0.000796616     |
| 218 | 20509939    | 10.1186/1471-2105-11-292      | TargetSpy                      | 2010        | 43              | 0.000785497     |
| 219 | 18675489    | 10.1016/j.tig.2008.06.003     | NCG                            | 2008        | 26              | 0.000785487     |
| 220 | 23946503    | 10.1093/bioinformatics/btt457 | omiRas                         | 2013        | 22              | 0.000784906     |
| 221 | 26635395    | 10.1093/nar/gkv1335           | novoMiRank                     | 2016        | 7               | 0.000780412     |
| 222 | 21908864    | 10.1093/bib/bbr043            | miR2Subpath                    | 2012        | 15              | 0.000779558     |
| 223 | 19910367    | 10.1093/nar/gkp1038           | GenomeRNAi                     | 2010        | 20              | 0.000778606     |
| 224 | 25609791    | 10.1093/bioinformatics/btv023 | Empirical GO                   | 2015        | 23              | 0.000775959     |
| 225 | 23610128    | 10.1261/rna.035279.112        | ShortStack                     | 2013        | 41              | 0.000769526     |
| 226 | 20876832    | 10.1261/rna.2225110           | Database of isomirs            | 2010        | 108             | 0.000761062     |
| 227 | 18490376    | 10.1093/nar/gkn250            | OligoWalk                      | 2008        | 19              | 0.000757072     |
| 228 | 22576177    | 10.1093/bioinformatics/bts282 | CPSS                           | 2012        | 15              | 0.000753591     |
| 229 | 22628521    | not applicable                | The UEA sRNA workbench         | 2012        | 75              | 0.000746838     |
| 230 | 24894665    | 10.1186/1471-2164-15-423      | CAP-miRSeq                     | 2014        | 26              | 0.000745552     |
| 231 | 23831580    | 10.1016/j.febslet.2013.06.047 | isomiRex                       | 2013        | 12              | 0.000740931     |
| 232 | 18586831    | 10.1093/nar/gkn399            | Bioinformatics Links Directory | 2008        | 8               | 0.000738017     |
| 233 | 16381916    | 10.1093/nar/gkj038            | FLIGHT                         | 2006        | 19              | 0.000732331     |

|     | <b>PMID</b> | <b>DOI</b>                       | <b>Name</b>                           | <b>Year</b> | <b>Citation</b> | <b>Pagerank</b> |
|-----|-------------|----------------------------------|---------------------------------------|-------------|-----------------|-----------------|
| 234 | 19908359    | not applicable                   | RNAz                                  | 2010        | 80              | 0.000731401     |
| 235 | 21835775    | 10.1093/nar/gkr646               | miRNA Body Map                        | 2011        | 36              | 0.000728637     |
| 236 | 17204154    | 10.1186/gb-2007-8-1-r3           | GeneCodis                             | 2007        | 208             | 0.000724786     |
| 237 | 20858738    | 10.1093/bib/bbq065               | psRNATarget                           | 2011        | 37              | 0.000720162     |
| 238 | 21609949    | 10.1093/nar/gkr372               | BioProfiling                          | 2011        | 42              | 0.000718654     |
| 239 | 23820017    | 10.1186/bcr3444                  | BreastMark                            | 2013        | 35              | 0.000718654     |
| 240 | 21097471    | 10.1093/nar/gkq1169              | LSD                                   | 2011        | 14              | 0.000718654     |
| 241 | 19015126    | 10.1093/nar/gkn873               | AHD                                   | 2009        | 12              | 0.000718654     |
| 242 | 23046413    | 10.1186/1471-2105-13-S15-S2      | PAGED                                 | 2012        | 8               | 0.000718654     |
| 243 | 16597336    | 10.1186/1471-2105-7-190          | MIMAS                                 | 2006        | 8               | 0.000718654     |
| 244 | 22586178    | 10.1093/bioinformatics/bts288    | HCS-Analyzer                          | 2012        | 4               | 0.000718654     |
| 245 | 16176584    | 10.1186/1471-2164-6-134          | GeneSeer                              | 2005        | 4               | 0.000718654     |
| 246 | 21087995    | 10.1093/nar/gkq1055              | Laminin database                      | 2011        | 2               | 0.000718654     |
| 247 | 20430753    | 10.1093/bioinformatics/btq233    | TAPIR                                 | 2010        | 53              | 0.000714535     |
| 248 | 17135194    | 10.1093/nar/gki906               | GenomeRNAi                            | 2007        | 16              | 0.000712976     |
| 249 | 23220571    | 10.1093/bioinformatics/bts698    | SM2miR                                | 2013        | 23              | 0.00071199      |
| 250 | 25398903    | 10.1093/nar/gku1162              | PNRD                                  | 2015        | 22              | 0.000710228     |
| 251 | 18477632    | 10.1093/nar/gkn264               | TargetRNA                             | 2008        | 57              | 0.000708278     |
| 252 | 23203880    | 10.1093/nar/gks1238              | YM500                                 | 2013        | 20              | 0.000708187     |
| 253 | 19461883    | 10.1371/journal.pcbi.1000386     | SHRiMP                                | 2009        | 207             | 0.00070783      |
| 254 | 24163105    | 10.1093/nar/gkt1028              | PolymiRTS                             | 2014        | 55              | 0.000707554     |
| 255 | 16870995    | 10.1261/rna.81006                | siRNARules                            | 2006        | 11              | 0.000707185     |
| 256 | 15980542    | 10.1093/nar/gki419               | dsCheck                               | 2005        | 36              | 0.000704803     |
| 257 | 18215311    | 10.1186/1471-2105-9-39           | miRNAminer                            | 2008        | 21              | 0.000701652     |
| 258 | 20459673    | 10.1186/1471-2164-11-288         | deep_sequencing                       | 2010        | 58              | 0.000701494     |
| 259 | 21364759    | 10.1371/journal.pone.0017429     | mirDIP                                | 2011        | 67              | 0.000699015     |
| 260 | 21062822    | 10.1093/nar/gkq1094              | miRGator                              | 2011        | 22              | 0.000695181     |
| 261 | 22276777    | 10.1186/1471-2164-13-44          | miRdSNP                               | 2012        | 43              | 0.000692187     |
| 262 | 19017659    | 10.1093/bioinformatics/btn604    | CleaveLand                            | 2009        | 129             | 0.000689307     |
| 263 | 15333460    | 10.1093/bioinformatics/bth498    | siRNA Design Software                 | 2005        | 18              | 0.000684056     |
| 264 | 17169981    | 10.1093/nar/gki991               | CSRDB                                 | 2007        | 39              | 0.000683044     |
| 265 | 19946373    | 10.1371/journal.pone.0008003     | RCoS                                  | 2009        | 68              | 0.000679989     |
| 266 | 20696049    | 10.1186/1471-2105-11-419         | TAM                                   | 2010        | 44              | 0.00067867      |
| 267 | 21375730    | 10.1186/1471-2105-12-67          | MIR@NT@N                              | 2011        | 28              | 0.000672948     |
| 268 | 23173617    | 10.1186/1471-2164-13-661         | MirSNP                                | 2012        | 59              | 0.000672051     |
| 269 | 19168909    | 10.1093/bioinformatics/btp014    | RNAither                              | 2009        | 26              | 0.000671189     |
| 270 | 21791068    | 10.1186/1471-2105-12-300         | miRTar                                | 2011        | 29              | 0.000670027     |
| 271 | 17540034    | 10.1186/1471-2105-8-178          | sIR                                   | 2007        | 10              | 0.000668361     |
| 272 | 17868480    | 10.1186/1471-2105-8-341          | MiRFinder                             | 2007        | 29              | 0.000667995     |
| 273 | 19628505    | 10.1093/bioinformatics/btp443    | LoessM                                | 2009        | 21              | 0.000663622     |
| 274 | 19933824    | 10.1093/bioinformatics/btp655    | A personalized microRNA microarray no | 2010        | 11              | 0.000663622     |
| 275 | 21441347    | 10.1261/rna.2474511              | miTALOS                               | 2011        | 13              | 0.000663569     |
| 276 | 21940835    | 10.1101/gr.123547.111            | PIPmiR                                | 2012        | 38              | 0.000663213     |
| 277 | 24217916    | 10.1093/nar/gkt1057              | NPInter                               | 2014        | 23              | 0.000660517     |
| 278 | 18269576    | 10.1111/j.1365-313X.2007.03328.x | Web MicroRNA Designer                 | 2008        | 141             | 0.000655567     |
| 279 | 23703212    | 10.1093/nar/gkt435               | Sfold                                 | 2013        | 25              | 0.000654764     |
| 280 | 25701573    | 10.1093/bioinformatics/btv113    | Oasis                                 | 2015        | 8               | 0.000651829     |

|     | <b>PMID</b> | <b>DOI</b>                    | <b>Name</b>                           | <b>Year</b> | <b>Citation</b> | <b>Pagerank</b> |
|-----|-------------|-------------------------------|---------------------------------------|-------------|-----------------|-----------------|
| 281 | 25829178    | 10.1093/nar/gkv295            | LNCipedia                             | 2015        | 25              | 0.000651497     |
| 282 | 19468042    | 10.1093/nar/gkp412            | MirZ                                  | 2009        | 35              | 0.000647082     |
| 283 | 18058708    | not applicable                | miRNApath                             | 2007        | 12              | 0.000646059     |
| 284 | 21743061    | 10.1093/bioinformatics/btr410 | Lasso_miR                             | 2011        | 37              | 0.00064465      |
| 285 | 24889152    | 10.1038/srep05150             | TSmiR                                 | 2014        | 28              | 0.000641792     |
| 286 | 23778453    | 10.4161/rna.25193             | mirTools                              | 2013        | 19              | 0.000641189     |
| 287 | 21269452    | 10.1186/1471-2164-12-64       | AgiMicroRna                           | 2011        | 50              | 0.000640064     |
| 288 | 25380780    | 10.1093/database/bau103       | VIRmiRNA                              | 2014        | 13              | 0.00063912      |
| 289 | 18836192    | 10.1093/nar/gkn544            | PETfold & PETcofold                   | 2008        | 32              | 0.00063861      |
| 290 | 26586799    | 10.1093/nar/gkv1252           | NONCODE                               | 2016        | 54              | 0.000637621     |
| 291 | 23793747    | 10.1093/bioinformatics/btt361 | Linc2GO                               | 2013        | 25              | 0.000636705     |
| 292 | 23180788    | 10.1093/nar/gks1138           | SomamiR                               | 2013        | 19              | 0.000635296     |
| 293 | 23042674    | 10.1093/nar/gks915            | LNCipedia                             | 2013        | 115             | 0.000635023     |
| 294 | 20550664    | 10.1186/gb-2010-11-6-r61      | NEXT-RNAi                             | 2010        | 24              | 0.000634317     |
| 295 | 25378301    | 10.1093/nar/gku1104           | miRDB                                 | 2015        | 129             | 0.000632437     |
| 296 | 23271954    | 10.1371/journal.pbio.1001450  | Vesiclepedia                          | 2012        | 197             | 0.000631978     |
| 297 | 18078843    | 10.1016/j.bbagr.2007.09.003   | Tomato Functional Genomics Databa     | 2008        | 32              | 0.000630399     |
| 298 | 24330401    | 10.1186/1471-2105-14-362      | iMir                                  | 2013        | 16              | 0.000623648     |
| 299 | 21896507    | 10.1093/bioinformatics/btr504 | wapRNA                                | 2011        | 20              | 0.000622525     |
| 300 | 20700506    | 10.1371/journal.pone.0011843  | MatureBayes                           | 2010        | 26              | 0.000621313     |
| 301 | 23209027    | 10.1093/nar/gks1142           | miTEA                                 | 2013        | 15              | 0.000620431     |
| 302 | 26093149    | 10.1093/bioinformatics/btv380 | Chimira                               | 2015        | 11              | 0.000619814     |
| 303 | 16531494    | 10.1105/tpc.105.039834        | Web MicroRNA Designer                 | 2006        | 331             | 0.000619596     |
| 304 | 25378335    | 10.1093/nar/gku1024           | MeT-DB                                | 2015        | 8               | 0.000619275     |
| 305 | 18006549    | 10.1093/bioinformatics/btm541 | BRB-ArrayTools                        | 2008        | 22              | 0.000619208     |
| 306 | 18927110    | 10.1093/nar/gkn707            | miROrtho                              | 2009        | 30              | 0.000618935     |
| 307 | 25325056    | 10.3389/fbioe.2014.00038      | IsomiRage                             | 2014        | 15              | 0.000615106     |
| 308 | 22135287    | 10.1093/nar/gkr1159           | miRNEST                               | 2012        | 13              | 0.000613517     |
| 309 | 22053076    | 10.1093/bioinformatics/btr598 | deepBlockAlign                        | 2012        | 9               | 0.000613429     |
| 310 | 18522801    | 10.1016/j.bbrc.2008.05.134    | CID-miRNA                             | 2008        | 22              | 0.000613373     |
| 311 | 26019179    | 10.1093/nar/gkv555            | sRNAtoolbox                           | 2015        | 29              | 0.00061252      |
| 312 | 22013167    | 10.1093/nar/gkr878            | mirEX                                 | 2012        | 15              | 0.000612492     |
| 313 | 21490719    | 10.1371/journal.pcbi.1002029  | NCG                                   | 2011        | 22              | 0.000612068     |
| 314 | 24096364    | 10.1038/nsmb.2678             | CancerMiner                           | 2013        | 51              | 0.000610635     |
| 315 | 22345618    | 10.1101/gr.130435.111         | CoMeTa                                | 2012        | 57              | 0.000610075     |
| 316 | 19528072    | 10.1093/nar/gkp531            | Bioinformatics Links Directory        | 2009        | 12              | 0.000608674     |
| 317 | 22188670    | 10.1186/1471-2105-12-488      | workflow of integrating mRNA and miRN | 2011        | 12              | 0.00060859      |
| 318 | 26921406    | 10.1093/nar/gkw116            | TissueAtlas                           | 2016        | 32              | 0.000604004     |
| 319 | 22743998    | 10.1038/cdd.2012.87           | miRDeathDB                            | 2012        | 7               | 0.000603603     |
| 320 | 26571139    | 10.1371/journal.pone.0143066  | miRge                                 | 2015        | 9               | 0.000603087     |
| 321 | 17959929    | 10.1261/rna.655107            | miRRim                                | 2007        | 23              | 0.000602239     |
| 322 | 25246430    | 10.1093/bioinformatics/btu628 | PhaseTank                             | 2015        | 4               | 0.000600728     |
| 323 | 22807998    | 10.1371/journal.pone.0035230  | SyStemCell                            | 2012        | 4               | 0.000600335     |
| 324 | 21646343    | 10.1093/nar/gkr378            | g:Profiler                            | 2011        | 196             | 0.00060004      |
| 325 | 22870325    | 10.1371/journal.pone.0042390  | miRSystem                             | 2012        | 52              | 0.000599576     |
| 326 | 26226356    | 10.1038/nmeth.3485            | miRWalk                               | 2015        | 114             | 0.000599327     |
| 327 | 24149053    | 10.1093/bioinformatics/btt605 | SoymiRNet                             | 2014        | 11              | 0.000597418     |

|     | <b>PMID</b> | <b>DOI</b>                       | <b>Name</b>                               | <b>Year</b> | <b>Citation</b> | <b>Pagerank</b> |
|-----|-------------|----------------------------------|-------------------------------------------|-------------|-----------------|-----------------|
| 328 | 18996894    | 10.1093/nar/gkn817               | siRecords                                 | 2009        | 11              | 0.000595749     |
| 329 | 21618345    | 10.1002/humu.21482               | miRvar                                    | 2011        | 11              | 0.000595246     |
| 330 | 25157074    | 10.1093/database/bau080          | miRBase Tracker                           | 2014        | 27              | 0.000594869     |
| 331 | 19933167    | 10.1093/bioinformatics/btp649    | mimiRNA                                   | 2010        | 29              | 0.000593628     |
| 332 | 18232104    | not applicable                   | Sfold                                     | 2008        | 15              | 0.000593443     |
| 333 | 21389147    | 10.1261/rna.2387911              | Antar                                     | 2011        | 31              | 0.000593248     |
| 334 | 19208136    | 10.1186/1471-2105-10-S1-S35      | HHMMiR                                    | 2009        | 25              | 0.000591721     |
| 335 | 23950912    | 10.1371/journal.pone.0070204     | HDMP                                      | 2013        | 30              | 0.000589785     |
| 336 | 24651967    | 10.1093/bioinformatics/btu155    | OncomiRDB                                 | 2014        | 20              | 0.000589774     |
| 337 | 22492627    | 10.1093/nar/gks310               | SAVoR                                     | 2012        | 7               | 0.000589064     |
| 338 | 18323537    | 10.1101/gr.6897308               | rice_build                                | 2008        | 119             | 0.000587251     |
| 339 | 17169980    | 10.1093/nar/gkl994               | ncRNAdb                                   | 2007        | 18              | 0.000585867     |
| 340 | 22362754    | 10.1093/nar/gks146               | miRNAFold                                 | 2012        | 11              | 0.00058452      |
| 341 | 23958307    | 10.1186/gb-2013-14-8-r84         | PROMiRNA                                  | 2013        | 23              | 0.0005832       |
| 342 | 23034802    | 10.1093/nar/gks901               | miRmap                                    | 2012        | 39              | 0.000580602     |
| 343 | 16317073    | 10.1093/bioinformatics/bti802    | microHARVESTER                            | 2006        | 34              | 0.000578851     |
| 344 | 18453555    | 10.1093/bioinformatics/btn137    | miREval                                   | 2008        | 16              | 0.000578712     |
| 345 | 24987111    | 10.1373/clinchem.2014.224238     | miRNACon                                  | 2014        | 19              | 0.000575814     |
| 346 | 16845041    | 10.1093/nar/gkl333               | RegRNA                                    | 2006        | 84              | 0.000575528     |
| 347 | 22290409    | 10.1007/s11103-012-9885-2        | miRDeepFinder                             | 2012        | 102             | 0.000575355     |
| 348 | 23334922    | 10.1093/bib/bbs010               | MIREAP                                    | 2013        | 14              | 0.000575278     |
| 349 | 19846596    | 10.1093/nar/gkp864               | siDesign                                  | 2009        | 20              | 0.000575212     |
| 350 | 20398296    | 10.1186/1471-2105-11-190         | PuTmiR                                    | 2010        | 15              | 0.000568949     |
| 351 | 23094086    | 10.1371/journal.pone.0047786     | miRandola                                 | 2012        | 53              | 0.000564851     |
| 352 | 25348401    | 10.1093/nar/gku967               | MGD/MGI                                   | 2015        | 141             | 0.000564784     |
| 353 | 16845073    | 10.1093/nar/gkl279               | CRSD                                      | 2006        | 22              | 0.000564564     |
| 354 | 21278192    | 10.1093/bioinformatics/btr046    | SHRiMP                                    | 2011        | 129             | 0.000564101     |
| 355 | 19324892    | 10.1093/nar/gkp120               | SSCprofiler                               | 2009        | 19              | 0.000563921     |
| 356 | 25063298    | 10.1093/nar/gku631               | multiMiR                                  | 2014        | 25              | 0.000563647     |
| 357 | 25398902    | 10.1093/nar/gku1156              | YM500                                     | 2015        | 11              | 0.000561016     |
| 358 | 23762306    | 10.1371/journal.pone.0065165     | miR-host                                  | 2013        | 20              | 0.000558057     |
| 359 | 20719744    | 10.1093/nar/gkq721               | PmiRKB                                    | 2011        | 13              | 0.000556513     |
| 360 | 26535109    | 10.12688/fl1000research.4591.3   | mirna-corpora                             | 2014        | 8               | 0.00055647      |
| 361 | 23946501    | 10.1093/bioinformatics/btt424    | isomiRID                                  | 2013        | 7               | 0.000554275     |
| 362 | 21390222    | 10.1371/journal.pone.0014742     | CircuitsDB                                | 2011        | 19              | 0.00055398      |
| 363 | 21596785    | 10.1093/nar/gkr351               | mirAct                                    | 2011        | 11              | 0.000553606     |
| 364 | 19508288    | 10.1111/j.1365-2052.2009.01921.x | Database of cattle candidate genes and ge | 2009        | 29              | 0.000553558     |
| 365 | 20186480    | 10.1007/s10522-010-9265-8        | NetAge                                    | 2010        | 22              | 0.000553558     |
| 366 | 23143105    | 10.1093/nar/gks1057              | MonarchBase                               | 2013        | 20              | 0.000553558     |
| 367 | 22863767    | 10.1093/bioinformatics/bts476    | sMBPLS                                    | 2012        | 20              | 0.000553558     |
| 368 | 20385013    | 10.1186/1471-2105-11-185         | cellHTS                                   | 2010        | 19              | 0.000553558     |
| 369 | 24163255    | 10.1093/nar/gkt959               | PED                                       | 2014        | 11              | 0.000553558     |
| 370 | 23448274    | 10.1186/1471-2229-13-33          | PASmiR                                    | 2013        | 11              | 0.000553558     |
| 371 | 24267009    | 10.1186/1471-2105-14-S14-S9      | PHDcleav                                  | 2013        | 9               | 0.000553558     |
| 372 | 22700703    | 10.1093/nar/gks632               | Bioinformatics Links Directory            | 2012        | 7               | 0.000553558     |
| 373 | 24204885    | 10.1371/journal.pone.0077596     | RNA-CODE                                  | 2013        | 4               | 0.000553558     |
| 374 | 25897123    | 10.1093/nar/gkv381               | miRiadne                                  | 2015        | 1               | 0.000553558     |



|     | <b>PMID</b> | <b>DOI</b>                    | <b>Name</b>                                | <b>Year</b> | <b>Citation</b> | <b>Pagerank</b> |
|-----|-------------|-------------------------------|--------------------------------------------|-------------|-----------------|-----------------|
| 375 | 18837977    | 10.1186/1471-2164-9-457       | CoGemiR                                    | 2008        | 11              | 0.000553165     |
| 376 | 23368412    | 10.1186/1471-2164-14-S1-S2    | miRTarCLIP                                 | 2013        | 16              | 0.000553119     |
| 377 | 17478504    | 10.1093/nar/gkm260            | FatiGO +                                   | 2007        | 104             | 0.000552075     |
| 378 | 22647358    | 10.1097/PPO.0b013e318258b771  | miRNA timeline                             | 2012        | 19              | 0.000551586     |
| 379 | 22348024    | 10.1371/journal.pone.0030766  | TALASSO                                    | 2012        | 19              | 0.000551178     |
| 380 | 19910305    | 10.1093/bioinformatics/btp635 | rip                                        | 2010        | 10              | 0.000549847     |
| 381 | 20860840    | 10.1186/1471-2105-11-476      | SVMicrO                                    | 2010        | 24              | 0.000548896     |
| 382 | 25943543    | 10.1093/nar/gkv418            | TFmiR                                      | 2015        | 13              | 0.000548746     |
| 383 | 23104891    | 10.1093/bioinformatics/bts631 | REA                                        | 2013        | 4               | 0.00054856      |
| 384 | 22144204    | 10.1007/978-1-61779-427-8_17  | PhenomiR                                   | 2012        | 15              | 0.000547676     |
| 385 | 20716610    | 10.1093/abbs/gmq072           | miRHrt                                     | 2010        | 9               | 0.00054628      |
| 386 | 18718944    | 10.1093/bioinformatics/btn442 | siDRM                                      | 2008        | 10              | 0.000545076     |
| 387 | 23700308    | 10.1093/nar/gkt426            | CoRAL                                      | 2013        | 8               | 0.00054489      |
| 388 | 19374773    | 10.1186/gb-2009-10-4-r39      | FANTOM4 EdgeExpressDB                      | 2009        | 28              | 0.000541817     |
| 389 | 19880380    | 10.1093/nar/gkp902            | UTRdb and UTRsite                          | 2010        | 97              | 0.000541255     |
| 390 | 24300438    | 10.1093/bioinformatics/btt678 | ISRNA                                      | 2014        | 5               | 0.000540412     |
| 391 | 22171334    | 10.1093/bioinformatics/btr686 | SeqTrimMap                                 | 2012        | 11              | 0.000540029     |
| 392 | 22904063    | 10.1093/nar/gks759            | miRror-Suite                               | 2012        | 11              | 0.000532414     |
| 393 | 22589709    | 10.1371/journal.pcbi.1002503  | SMiR-NBI                                   | 2012        | 109             | 0.000531982     |
| 394 | 21435384    | 10.1016/j.gene.2011.03.005    | HOCTARdb                                   | 2011        | 17              | 0.000530793     |
| 395 | 21940779    | 10.1261/rna.2750811           | RNAcentral                                 | 2011        | 27              | 0.000529679     |
| 396 | 24714572    | 10.1371/journal.pone.0093248  | MiClip                                     | 2014        | 8               | 0.000528793     |
| 397 | 26590255    | 10.1093/nar/gkv1273           | deepBase                                   | 2016        | 21              | 0.000525416     |
| 398 | 24803672    | 10.1093/nar/gku376            | STarMir                                    | 2014        | 18              | 0.000525313     |
| 399 | 26424084    | 10.1093/database/bav098       | miRSponge                                  | 2015        | 11              | 0.000524874     |
| 400 | 16355253    | 10.1371/journal.pcbi.0010069  | Revealing posttranscriptional regulatory e | 2005        | 36              | 0.000523133     |
| 401 | 25628353    | 10.1093/nar/gkv050            | MIRZA-G                                    | 2015        | 9               | 0.000522075     |
| 402 | 22110646    | 10.1371/journal.pone.0027422  | MaturePred                                 | 2011        | 17              | 0.000521196     |
| 403 | 23497112    | 10.1186/1471-2105-14-83       | HuntMi                                     | 2013        | 12              | 0.000520618     |
| 404 | 20542914    | 10.1093/nar/gkq553            | Bioinformatics Links Directory             | 2010        | 8               | 0.000520234     |
| 405 | 20934992    | 10.1093/bioinformatics/btq568 | Target-align                               | 2010        | 21              | 0.000519203     |
| 406 | 24792049    | 10.1007/978-1-4939-0700-7_9   | AthaMap                                    | 2014        | 10              | 0.00051818      |
| 407 | 24712981    | 10.1186/1471-2164-15-271      | SFGD                                       | 2014        | 10              | 0.00051818      |
| 408 | 25982315    | 10.1093/database/bav047       | GraP                                       | 2015        | 5               | 0.00051818      |
| 409 | 22915600    | 10.1261/rna.033282.112        | PACCMIT/PACCMIT-CDS                        | 2012        | 6               | 0.000517777     |
| 410 | 23708386    | 10.1038/nmeth.2489            | MicroMUMMIE                                | 2013        | 21              | 0.000517001     |
| 411 | 24827614    | not applicable                | Sfold                                      | 2014        | 4               | 0.000516948     |
| 412 | 23748953    | 10.1093/nar/gkt466            | MiRdup                                     | 2013        | 11              | 0.000516906     |
| 413 | 22923300    | 10.1093/bioinformatics/bts519 | RIsearch                                   | 2012        | 20              | 0.000514768     |
| 414 | 23775795    | 10.1093/nar/gkt485            | miRspring                                  | 2013        | 7               | 0.000514019     |
| 415 | 24135265    | 10.1093/bioinformatics/btt599 | TargetScore                                | 2014        | 7               | 0.000513683     |
| 416 | 15608162    | 10.1093/nar/gki136            | siRNadb                                    | 2005        | 13              | 0.000511891     |
| 417 | 25338717    | 10.1093/bioinformatics/btu696 | FlaiMapper                                 | 2015        | 5               | 0.000511871     |
| 418 | 23200141    | 10.1016/j.gpb.2012.08.005     | miRT                                       | 2012        | 8               | 0.000511656     |
| 419 | 20212452    | 10.1038/labinvest.2010.53     | S-MED                                      | 2010        | 31              | 0.000511535     |
| 420 | 20492641    | 10.1186/1748-7188-5-22        | PETfold & PETcofold                        | 2010        | 6               | 0.00051067      |
| 421 | 21693556    | 10.1093/nar/gkr414            | mirsnpscore                                | 2011        | 25              | 0.000510112     |

|     | <b>PMID</b> | <b>DOI</b>                        | <b>Name</b>                        | <b>Year</b> | <b>Citation</b> | <b>Pagerank</b> |
|-----|-------------|-----------------------------------|------------------------------------|-------------|-----------------|-----------------|
| 422 | 20444868    | 10.1093/nar/gkq317                | E-RNAi                             | 2010        | 31              | 0.000509532     |
| 423 | 24608173    | 10.1093/database/bau015           | NCG                                | 2014        | 23              | 0.000509532     |
| 424 | 19465387    | 10.1093/nar/gkp416                | GeneCodis                          | 2009        | 152             | 0.000508622     |
| 425 | 23175610    | 10.1093/nar/gks1115               | MGD/MGI                            | 2013        | 32              | 0.000508478     |
| 426 | 18586744    | 10.1093/bioinformatics/btn175     | MiRank                             | 2008        | 21              | 0.000508092     |
| 427 | 21441575    | 10.1093/bioinformatics/btr153     | PlantMiRNAPred                     | 2011        | 18              | 0.000508062     |
| 428 | 23055620    | 10.6026/97320630008731            | ceRDB                              | 2012        | 22              | 0.00050701      |
| 429 | 24273243    | 10.1093/bioinformatics/btt677     | miRPD                              | 2014        | 20              | 0.000506869     |
| 430 | 21641561    | 10.1016/S1672-0229(11)60006-5     | ppt-miRBase                        | 2011        | 7               | 0.000506093     |
| 431 | 25332392    | 10.1093/nar/gku1000               | lncRNASNP                          | 2015        | 28              | 0.000503127     |
| 432 | 25288656    | 10.1093/database/bau099           | miRIAD                             | 2014        | 15              | 0.000503112     |
| 433 | 22914220    | 10.1093/bioinformatics/bts496     | shortran                           | 2012        | 5               | 0.000502286     |
| 434 | 24285297    | 10.1093/nar/gkt1167               | rSNPBase                           | 2014        | 23              | 0.000501387     |
| 435 | 21999641    | 10.1186/1471-2164-12-507          | Chipster                           | 2011        | 70              | 0.0005002       |
| 436 | 22467211    | 10.1093/nar/gks277                | PAREsnip                           | 2012        | 30              | 0.00049961      |
| 437 | 22723856    | 10.1371/journal.pone.0038365      | miRtest                            | 2012        | 10              | 0.000499424     |
| 438 | 25378313    | 10.1093/nar/gku1060               | LNCipedia                          | 2015        | 50              | 0.000499398     |
| 439 | 22802077    | 10.1158/0008-5472.CAN-12-1370     | CellMiner                          | 2012        | 104             | 0.000498526     |
| 440 | 26590405    | 10.1093/nar/gkv1268               | TSGene                             | 2016        | 30              | 0.000498526     |
| 441 | 20965973    | 10.1093/nar/gkq991                | Tomato Functional Genomics Databa  | 2011        | 27              | 0.000498526     |
| 442 | 25256573    | 10.1093/bioinformatics/btu633     | MTide                              | 2015        | 11              | 0.000498526     |
| 443 | 22345404    | 10.1096/fj.11-194381              | KUPKB                              | 2012        | 9               | 0.000498526     |
| 444 | 15723697    | 10.1186/1471-2164-6-24            | DAS                                | 2005        | 5               | 0.000498526     |
| 445 | 26026167    | 10.1093/bioinformatics/btv331     | RPdb                               | 2015        | 1               | 0.000498526     |
| 446 | 21059227    | 10.1186/1471-2229-10-240          | miSolRNA                           | 2010        | 1               | 0.000498526     |
| 447 | 24629096    | 10.1186/1471-2105-15-73           | mrSNP                              | 2014        | 14              | 0.000497598     |
| 448 | 21088024    | 10.1093/bioinformatics/btq634     | PETfold & PETcofold                | 2011        | 20              | 0.00049758      |
| 449 | 26612864    | 10.1093/nar/gkv1270               | DIANA-LncBase                      | 2016        | 12              | 0.000497543     |
| 450 | 20871108    | 10.1093/bioinformatics/btq545     | SylArray                           | 2010        | 18              | 0.000495359     |
| 451 | 19660144    | 10.1186/1471-2164-10-366          | MicroPC                            | 2009        | 9               | 0.000495078     |
| 452 | 23300555    | 10.1371/journal.pone.0051673      | MiRmat                             | 2012        | 7               | 0.000494788     |
| 453 | 20529892    | 10.1093/bioinformatics/btq298     | miRror-Suite                       | 2010        | 18              | 0.000493587     |
| 454 | 23049860    | 10.1371/journal.pone.0045782      | miR-BAG                            | 2012        | 4               | 0.000493282     |
| 455 | 22439011    | 10.1371/journal.pone.0033888      | microPIR                           | 2012        | 13              | 0.000493088     |
| 456 | 24907367    | 10.1093/bioinformatics/btu377     | MAGI                               | 2014        | 5               | 0.000493033     |
| 457 | 18725951    | 10.1371/journal.pcbi.1000150      | self-containment index calculation | 2008        | 10              | 0.00049255      |
| 458 | 26407127    | 10.1371/journal.pcbi.1004391      | miRTex                             | 2015        | 7               | 0.000491855     |
| 459 | 22583976    | 10.1186/1471-2229-12-68           | miRFANs                            | 2012        | 4               | 0.000491685     |
| 460 | 23284279    | 10.1371/journal.pcbi.1002830      | ComiR                              | 2012        | 13              | 0.000491456     |
| 461 | 22428086    | 10.1038/srep00318                 | miren                              | 2012        | 18              | 0.000491385     |
| 462 | 23376192    | 10.1093/bib/bbs082                | Pharmaco-miRs                      | 2014        | 20              | 0.000491296     |
| 463 | 25052703    | 10.1093/database/bau076           | APADB                              | 2014        | 11              | 0.000490474     |
| 464 | 26473382    | 10.1146/annurev-genet-120213-0920 | MirGeneDB                          | 2015        | 30              | 0.000488742     |
| 465 | 26243198    | 10.1038/srep12832                 | miRegulome                         | 2015        | 4               | 0.00048853      |
| 466 | 25120269    | 10.1093/nar/gku693                | sPARTA                             | 2014        | 11              | 0.000487691     |
| 467 | 22720726    | 10.1186/1471-2105-13-140          | miREvo                             | 2012        | 37              | 0.000486159     |
| 468 | 22356618    | 10.1186/1471-2105-13-36           | miRTrail                           | 2012        | 12              | 0.000485495     |

|     | <b>PMID</b> | <b>DOI</b>                       | <b>Name</b>                              | <b>Year</b> | <b>Citation</b> | <b>Pagerank</b> |
|-----|-------------|----------------------------------|------------------------------------------|-------------|-----------------|-----------------|
| 469 | 17379214    | 10.1016/j.febslet.2007.03.022    | mRTP                                     | 2007        | 13              | 0.000485322     |
| 470 | 19371411    | 10.1186/1471-2105-10-108         | dbSMR                                    | 2009        | 21              | 0.000484709     |
| 471 | 17702763    | 10.1093/nar/gkm610               | Vir-Mir db                               | 2008        | 25              | 0.000482999     |
| 472 | 20855970    | 10.4161/fly.4.4.13303            | FLIGHT                                   | 2010        | 2               | 0.000482704     |
| 473 | 21326606    | 10.1371/journal.pone.0016657     | dPORE                                    | 2011        | 13              | 0.000481857     |
| 474 | 21171994    | 10.1186/1471-2164-11-716         | E-miR                                    | 2010        | 32              | 0.000480349     |
| 475 | 20628498    | not applicable                   | miRiam                                   | 2010        | 15              | 0.000480253     |
| 476 | 23688306    | 10.1186/1758-907X-4-2            | cWords                                   | 2013        | 6               | 0.000480182     |
| 477 | 24339831    | 10.3389/fgene.2013.00283         | Circ2Traits                              | 2013        | 41              | 0.000480092     |
| 478 | 25077821    | 10.1186/1755-8794-7-S1-S9        | GAMUT                                    | 2014        | 4               | 0.00047964      |
| 479 | 17986453    | 10.1093/nar/gkm949               | microTranspoGene                         | 2008        | 33              | 0.000479109     |
| 480 | 24357407    | 10.1093/nar/gkt1318              | miRMAP (Visualization)                   | 2014        | 7               | 0.000478532     |
| 481 | 19015153    | 10.1093/nar/gkn852               | sRNAMap                                  | 2009        | 30              | 0.000478507     |
| 482 | 20801769    | 10.1261/rna.2226910              | ncRNAimprint                             | 2010        | 14              | 0.000476214     |
| 483 | 26586797    | 10.1093/nar/gkv1254              | DIANA-miRGen                             | 2016        | 9               | 0.000475804     |
| 484 | 23475160    | 10.1039/c3mb25518b               | DisTMGneT                                | 2013        | 9               | 0.000475664     |
| 485 | 19400940    | 10.1186/1752-0509-3-43           | A combinatorial approach to determine th | 2009        | 2               | 0.000475312     |
| 486 | 21045064    | 10.1093/nar/gkq1024              | CCDB                                     | 2011        | 20              | 0.000475137     |
| 487 | 20074352    | 10.1186/1471-2105-11-29          | miRMaid                                  | 2010        | 6               | 0.000474968     |
| 488 | 24992957    | 10.1038/srep05576                | PEMDAM                                   | 2014        | 8               | 0.000474379     |
| 489 | 26141515    | 10.1186/s12870-015-0533-2        | mirEX                                    | 2015        | 6               | 0.000473511     |
| 490 | 23865691    | 10.1111/age.12072                | miRNA SNIper                             | 2013        | 7               | 0.000472528     |
| 491 | 20513647    | 10.1093/nar/gkq405               | AltAnalyze and DomainGraph               | 2010        | 86              | 0.00047101      |
| 492 | 25416797    | 10.1093/nar/gku1180              | DoRiNA                                   | 2015        | 17              | 0.00047101      |
| 493 | 17644215    | 10.1016/j.cmpb.2007.06.001       | RFRADB-siRNA                             | 2007        | 12              | 0.00047101      |
| 494 | 25352543    | 10.1093/nar/gku991               | RNAcentral                               | 2015        | 26              | 0.000470322     |
| 495 | 21619662    | 10.1186/1471-2105-12-216         | miRFam                                   | 2011        | 9               | 0.000470224     |
| 496 | 24371150    | 10.1093/bioinformatics/btt746    | tasiRNadb                                | 2014        | 7               | 0.000469468     |
| 497 | 22693224    | 10.1093/nar/gks554               | PsRobot                                  | 2012        | 55              | 0.000468041     |
| 498 | 19358699    | 10.1186/1471-2105-10-105         | RISCbinder                               | 2009        | 14              | 0.000466882     |
| 499 | 23703208    | 10.1093/nar/gkt379               | ComiR                                    | 2013        | 41              | 0.000466739     |
| 500 | 22268718    | 10.1111/j.1365-313X.2012.04922.x | SoMART                                   | 2012        | 22              | 0.0004665       |
| 501 | 24013925    | 10.1093/bioinformatics/btt439    | targetHub                                | 2013        | 4               | 0.000466424     |
| 502 | 25618864    | 10.1093/bioinformatics/btv039    | MIDP                                     | 2015        | 10              | 0.000465745     |
| 503 | 20233390    | 10.1186/1471-2105-11-133         | MapMi                                    | 2010        | 22              | 0.000465303     |
| 504 | 20676076    | 10.1038/nmeth0810-576            | mrsFAST                                  | 2010        | 109             | 0.000463929     |
| 505 | 21976726    | 10.1093/nar/gkr770               | CMP                                      | 2011        | 10              | 0.000463183     |
| 506 | 21177657    | 10.1093/nar/gkq1256              | mESADB                                   | 2011        | 8               | 0.000462836     |
| 507 | 24894504    | 10.1093/bioinformatics/btu373    | Mirsynergy                               | 2014        | 13              | 0.000462111     |
| 508 | 24136998    | 10.1093/nar/gkt905               | SoyKB                                    | 2014        | 24              | 0.00046187      |
| 509 | 27009551    | 10.1038/srep23700                | miR-isomiRExp                            | 2016        | 10              | 0.000460726     |
| 510 | 24352679    | 10.1098/rsif.2013.1057           | SmiRN-AD                                 | 2014        | 7               | 0.000460113     |
| 511 | 18430991    | not applicable                   | M@IA                                     | 2008        | 4               | 0.000459962     |
| 512 | 25165094    | 10.1093/bioinformatics/btu573    | MIRPIPE                                  | 2014        | 6               | 0.000459753     |
| 513 | 27179030    | 10.1093/nar/gkw427               | DeAnnIso                                 | 2016        | 3               | 0.000459753     |
| 514 | 25233092    | 10.1371/journal.pone.0108010     | LncRBase                                 | 2014        | 7               | 0.000459378     |
| 515 | 25762653    | 10.1093/bioinformatics/btv140    | miR2GO                                   | 2015        | 5               | 0.000459192     |

|     | <b>PMID</b> | <b>DOI</b>                    | <b>Name</b>                    | <b>Year</b> | <b>Citation</b> | <b>Pagerank</b> |
|-----|-------------|-------------------------------|--------------------------------|-------------|-----------------|-----------------|
| 516 | 20959382    | 10.1093/bioinformatics/btq589 | MiRonTop                       | 2010        | 18              | 0.000458956     |
| 517 | 17148483    | 10.1093/nar/gkl1009           | ViTa                           | 2007        | 28              | 0.000458771     |
| 518 | 20542890    | 10.1093/bioinformatics/btq310 | Signalink                      | 2010        | 26              | 0.000456174     |
| 519 | 21715385    | 10.1093/nar/gkr514            | Bioinformatics Links Directory | 2011        | 6               | 0.000455679     |
| 520 | 28421868    | 10.1080/15476286.2017.1312226 | RKNNMDA                        | 2017        | 8               | 0.000455167     |
| 521 | 23193271    | 10.1093/nar/gks1170           | GenomeRNAi                     | 2013        | 46              | 0.0004545       |
| 522 | 25313157    | 10.1093/nar/gku956            | Xenbase                        | 2015        | 45              | 0.0004545       |
| 523 | 22411954    | 10.1261/rna.025627.110        | RNAimmuno                      | 2012        | 11              | 0.0004545       |
| 524 | 20410240    | 10.1261/rna.2005710           | DualTargeting                  | 2010        | 7               | 0.0004545       |
| 525 | 26166713    | 10.1038/srep12062             | RPASuite                       | 2015        | 5               | 0.0004545       |
| 526 | 25972521    | 10.1093/database/bav042       | AtmiRNET                       | 2015        | 5               | 0.0004545       |
| 527 | 24931994    | 10.1093/bioinformatics/btu270 | BlockClust                     | 2014        | 4               | 0.0004545       |
| 528 | 25117656    | 10.1186/1471-2105-15-275      | miRPlant                       | 2014        | 13              | 0.000452666     |
| 529 | 24048357    | 10.1093/bioinformatics/btt545 | miREval                        | 2013        | 5               | 0.000450861     |
| 530 | 15591357    | 10.1093/bioinformatics/bti196 | SiDE                           | 2005        | 10              | 0.000450816     |
| 531 | 23012261    | 10.1093/nar/gks878            | HeteroMirPred                  | 2013        | 11              | 0.000450704     |
| 532 | 22080562    | 10.1093/nar/gkr952            | NCG                            | 2012        | 12              | 0.000450333     |
| 533 | 20975837    | 10.1371/journal.pone.0013534  | ExprTargetDB                   | 2010        | 38              | 0.00045008      |
| 534 | 23009561    | 10.1186/1471-2105-13-246      | ncRNAclassifier                | 2012        | 4               | 0.000449874     |
| 535 | 22160653    | 10.1007/s00705-011-1181-y     | vHoT                           | 2012        | 6               | 0.000449843     |
| 536 | 20871826    | 10.4061/2010/495904           | NOVOMIR                        | 2010        | 5               | 0.000448905     |
| 537 | 23725466    | 10.1186/1471-2105-14-174      | PMTED                          | 2013        | 7               | 0.000448831     |
| 538 | 25344330    | 10.1186/s13059-014-0500-5     | mirMark                        | 2014        | 6               | 0.000448744     |
| 539 | 25629077    | 10.1002/mgg3.110              | miRNA-regulome                 | 2015        | 3               | 0.000448691     |
| 540 | 22206472    | 10.1186/1471-2164-12-636      | p-TAREF                        | 2011        | 7               | 0.000448169     |
| 541 | 24884650    | 10.1186/1471-2105-15-124      | Discriminant                   | 2014        | 8               | 0.000447818     |
| 542 | 22824421    | 10.1186/1752-0509-6-90        | tfmirloop                      | 2012        | 7               | 0.000447002     |
| 543 | 26304537    | 10.1093/nar/gkv853            | Pan-ceRNADB                    | 2015        | 16              | 0.000446868     |
| 544 | 25378249    | 10.1101/gr.178194.114         | Cupid                          | 2015        | 14              | 0.000446868     |
| 545 | 20413915    | not applicable                | TAREF                          | 2010        | 10              | 0.000446634     |
| 546 | 24593312    | 10.1186/1471-2164-15-176      | eRNA                           | 2014        | 8               | 0.000446446     |
| 547 | 27324197    | 10.1093/bioinformatics/btw334 | mdgsa                          | 2016        | 4               | 0.000446245     |
| 548 | 25274736    | 10.1093/nar/gku903            | ViRBase                        | 2015        | 19              | 0.000445787     |
| 549 | 25270639    | 10.1093/bioinformatics/btu614 | BioVLAB-MMIA-NGS               | 2015        | 5               | 0.0004456       |
| 550 | 25527833    | 10.1093/bioinformatics/btu819 | mirPub                         | 2015        | 4               | 0.000445302     |
| 551 | 25352731    | 10.6026/97320630010602        | TargetCompare                  | 2014        | 3               | 0.000445226     |
| 552 | 25921073    | 10.1002/pmic.201400515        | FunRich                        | 2015        | 68              | 0.000443494     |
| 553 | 25388151    | 10.1093/bioinformatics/btu741 | EVpedia                        | 2015        | 38              | 0.000443494     |
| 554 | 22067456    | 10.1093/nar/gkr953            | FlyRNAi                        | 2012        | 23              | 0.000443494     |
| 555 | 26578586    | 10.1093/nar/gkv1215           | GREENC                         | 2016        | 12              | 0.000443494     |
| 556 | 26657895    | 10.1093/pcp/pcv201            | CANTATadb                      | 2016        | 7               | 0.000443494     |
| 557 | 26716983    | 10.1371/journal.pone.0145386  | miRLAB                         | 2015        | 4               | 0.000443494     |
| 558 | 26283178    | 10.1186/s12859-015-0680-3     | MVDA                           | 2015        | 4               | 0.000443494     |
| 559 | 27216254    | 10.1186/s13326-015-0044-y     | miRiad (Text Mining Tool)      | 2016        | 2               | 0.000443494     |
| 560 | 21976421    | 10.1093/bioinformatics/btr527 | SeqBuster                      | 2011        | 6               | 0.000442384     |
| 561 | 19091027    | 10.1186/1471-2105-9-S12-S4    | MiRTif                         | 2008        | 21              | 0.000442283     |
| 562 | 25379175    | 10.1186/2047-217X-3-20        | mirnaTA                        | 2014        | 3               | 0.000442151     |

|     | <b>PMID</b> | <b>DOI</b>                    | <b>Name</b>                        | <b>Year</b> | <b>Citation</b> | <b>Pagerank</b> |
|-----|-------------|-------------------------------|------------------------------------|-------------|-----------------|-----------------|
| 563 | 25932650    | 10.1371/journal.pone.0125222  | TMREC                              | 2015        | 3               | 0.000441327     |
| 564 | 20399081    | 10.1016/j.artmed.2010.03.004  | PMirP                              | 2010        | 9               | 0.000440723     |
| 565 | 19563653    | 10.1186/1471-2229-9-82        | GrapeMiRNA                         | 2009        | 2               | 0.0004404       |
| 566 | 24930140    | 10.1093/bioinformatics/btu380 | miR-PREFeR                         | 2014        | 11              | 0.000440087     |
| 567 | 23805282    | 10.1371/journal.pone.0066857  | miReader                           | 2013        | 6               | 0.000439563     |
| 568 | 25281301    | 10.1186/1471-2105-15-336      | SITPR                              | 2014        | 10              | 0.000439506     |
| 569 | 24340000    | 10.1371/journal.pone.0082160  | CyTargetLinker                     | 2013        | 20              | 0.000439506     |
| 570 | 21602264    | 10.1093/nar/gkr374            | miRvestigator                      | 2011        | 15              | 0.000439491     |
| 571 | 22705792    | 10.1093/nar/gks505            | NorahDesk                          | 2012        | 4               | 0.000439297     |
| 572 | 23594715    | 10.1186/2043-9113-3-7         | TUMIR                              | 2013        | 3               | 0.000436615     |
| 573 | 26743510    | 10.1093/bioinformatics/btw002 | miRDB                              | 2016        | 15              | 0.000435858     |
| 574 | 23203886    | 10.1093/nar/gks1153           | MIPS PlantsDB                      | 2013        | 41              | 0.000435632     |
| 575 | 24759728    | 10.1038/ncomms4722            | Comparative Sequencing of Plant Sm | 2014        | 39              | 0.000435632     |
| 576 | 20152038    | 10.1186/1471-2105-11-87       | Lists2Networks                     | 2010        | 25              | 0.000435632     |
| 577 | 23163954    | 10.1186/1471-2229-12-218      | BraMRs                             | 2012        | 14              | 0.000435632     |
| 578 | 26582915    | 10.1093/nar/gkv1265           | piRNA cluster database             | 2016        | 7               | 0.000435632     |
| 579 | 26205472    | 10.1038/srep12522             | HPVbase                            | 2015        | 6               | 0.000435632     |
| 580 | 26849207    | 10.1371/journal.pone.0148521  | CHNmiRD                            | 2016        | 5               | 0.000435632     |
| 581 | 26818131    | 10.1038/srep20031             | siRNAmoD                           | 2016        | 5               | 0.000435632     |
| 582 | 26040329    | 10.1186/1471-2164-16-S5-S12   | DISMIRA                            | 2015        | 3               | 0.000435632     |
| 583 | 25795417    | 10.1261/rna.043612.113        | miRBoost                           | 2015        | 2               | 0.000435632     |
| 584 | 23377977    | 10.1007/978-94-007-5590-1_13  | starBase                           | 2013        | 2               | 0.000435632     |
| 585 | 26022464    | 10.1186/s12859-015-0594-0     | Mirinho                            | 2015        | 1               | 0.000435632     |
| 586 | 25692236    | 10.1080/15476286.2014.996465  | HMED                               | 2014        | 8               | 0.00043538      |
| 587 | 19553345    | 10.1261/rna.1617009           | recit                              | 2009        | 7               | 0.000435158     |
| 588 | 24565134    | 10.1186/1752-0509-7-S2-S7     | cGRNB                              | 2013        | 4               | 0.000435012     |
| 589 | 20347954    | 10.1016/j.ygeno.2010.03.009   | ZooMir                             | 2010        | 20              | 0.000434621     |
| 590 | 26578591    | 10.1093/nar/gkv1220           | SomamiR                            | 2016        | 6               | 0.000434181     |
| 591 | 21881406    | 10.4161/rna.8.5.16026         | mirExplorer                        | 2011        | 9               | 0.000432173     |
| 592 | 25614300    | 10.1038/srep08004             | MBSTAR                             | 2015        | 1               | 0.000431885     |
| 593 | 21483898    | 10.1039/c0mb00347f            | PmmR                               | 2011        | 5               | 0.000430552     |
| 594 | 21171988    | 10.1186/1471-2164-11-715      | miRNeye                            | 2010        | 60              | 0.000430426     |
| 595 | 24926662    | 10.1371/journal.pone.0098965  | InCeDB                             | 2014        | 21              | 0.000429736     |
| 596 | 26773058    | 10.1093/nar/gkv1478           | CrossHub                           | 2016        | 6               | 0.000429736     |
| 597 | 26917558    | 10.1261/rna.055301.115        | MiRNA GO Annotation Manual         | 2016        | 4               | 0.000429736     |
| 598 | 26608597    | 10.1186/s12864-015-1933-2     | Avishkar                           | 2015        | 4               | 0.000429736     |
| 599 | 26169799    | 10.1016/j.gpb.2015.05.003     | MMiRNA-Tar                         | 2015        | 2               | 0.000429736     |
| 600 | 24372038    | 10.1142/S0219720013430099     | rnaanals                           | 2013        | 2               | 0.000429736     |
| 601 | 25562198    | 10.1089/omi.2014.0106         | ExcellmiRDB                        | 2015        | 1               | 0.000429321     |
| 602 | 24564296    | 10.1186/1471-2105-15-S1-S4    | HOCCLUS2                           | 2014        | 10              | 0.000428838     |
| 603 | 16403789    | 10.1093/bioinformatics/btk041 | GUUGle                             | 2006        | 13              | 0.000428239     |
| 604 | 17381315    | 10.1101/sqb.2006.71.056       | Patrocles                          | 2006        | 17              | 0.000427879     |
| 605 | 21194446    | 10.1186/1471-2105-11-612      | mirna_target                       | 2010        | 10              | 0.000427879     |
| 606 | 22303397    | 10.3389/fgene.2011.00103      | microT-ANN                         | 2011        | 5               | 0.000427408     |
| 607 | 21385032    | 10.1089/cmb.2010.0256         | treebic                            | 2011        | 2               | 0.000425439     |
| 608 | 25492647    | 10.1038/ncomms6700            | microTSS                           | 2014        | 14              | 0.000425276     |
| 609 | 25877638    | 10.1093/database/bav029       | miRNASNP                           | 2015        | 14              | 0.00042515      |

|     | <b>PMID</b> | <b>DOI</b>                        | <b>Name</b>                     | <b>Year</b> | <b>Citation</b> | <b>Pagerank</b> |
|-----|-------------|-----------------------------------|---------------------------------|-------------|-----------------|-----------------|
| 610 | 23851377    | 10.4161/rna.25538                 | Small RNA Workbench             | 2013        | 7               | 0.00042515      |
| 611 | 26542525    | 10.1186/s12859-015-0798-3         | miRA                            | 2015        | 6               | 0.00042515      |
| 612 | 25874014    | 10.7150/jgen.11246                | miRNA-SNiPer                    | 2015        | 3               | 0.00042515      |
| 613 | 23326485    | 10.1371/journal.pone.0053685      | mirTarPri                       | 2013        | 3               | 0.00042515      |
| 614 | 21436129    | 10.1093/bioinformatics/btr148     | miRD                            | 2011        | 7               | 0.000424716     |
| 615 | 21949731    | 10.1371/journal.pone.0024583      | MultiMiTar                      | 2011        | 11              | 0.000424594     |
| 616 | 24829448    | 10.1093/nar/gku409                | ToppMiR                         | 2014        | 5               | 0.00042451      |
| 617 | 21149264    | 10.1093/nar/gkq1233               | RepTar                          | 2011        | 14              | 0.000424161     |
| 618 | 26998997    | 10.1371/journal.pone.0151771      | miTALOS                         | 2016        | 7               | 0.000424103     |
| 619 | 18037683    | 10.1093/bioinformatics/btm572     | mircisreg                       | 2008        | 4               | 0.000422898     |
| 620 | 24609385    | 10.1093/nar/gku182                | ProMISE                         | 2014        | 13              | 0.000422732     |
| 621 | 24515121    | 10.1101/gr.169508.113             | ISMARA                          | 2014        | 43              | 0.000422597     |
| 622 | 24069606    | 10.1155/2013/905429               | SeedSeq                         | 2013        | 1               | 0.000422597     |
| 623 | 17324940    | 10.1093/bioinformatics/btm031     | Bioinformatics Resource Manager | 2007        | 21              | 0.000421481     |
| 624 | 26464443    | 10.1093/nar/gkv1036               | RMBase                          | 2016        | 13              | 0.000421481     |
| 625 | 23209882    | 10.1155/2012/652979               | miRNAprediction                 | 2012        | 5               | 0.000421481     |
| 626 | 26759061    | 10.1038/srep19264                 | Psmir                           | 2016        | 4               | 0.000421481     |
| 627 | 25961860    | 10.1371/journal.pone.0126151      | MiRduplexSVM                    | 2015        | 3               | 0.000421481     |
| 628 | 26635394    | 10.1093/nar/gkv1308               | RBP-Var                         | 2016        | 2               | 0.000421481     |
| 629 | 18984623    | 10.1093/nar/gkn763                | Transterm                       | 2009        | 30              | 0.000420584     |
| 630 | 23074262    | 10.1093/bioinformatics/bts615     | RNA22                           | 2012        | 27              | 0.000419327     |
| 631 | 24525374    | 10.1016/j.compbiolchem.2014.01.00 | lncRNAMap                       | 2014        | 7               | 0.000419009     |
| 632 | 22573175    | 10.1093/nar/gks402                | GeneCodis                       | 2012        | 172             | 0.000418479     |
| 633 | 27076459    | 10.1109/TCBB.2016.2550432         | ifmda                           | 2016        | 43              | 0.000418479     |
| 634 | 18480122    | 10.1093/nar/gkn280                | AsiDesigner                     | 2008        | 6               | 0.000418479     |
| 635 | 18397893    | 10.1093/bioinformatics/btn121     | SpecificityServer               | 2008        | 6               | 0.000418479     |
| 636 | 27924038    | 10.1093/nar/gkw973                | FARNA                           | 2017        | 2               | 0.000418479     |
| 637 | 27036505    | 10.1186/s12859-016-0958-0         | isomiR-SEA                      | 2016        | 1               | 0.000418479     |
| 638 | 22406831    | 10.1093/nar/gks228                | RandA                           | 2012        | 6               | 0.000417912     |
| 639 | 23299413    | 10.1093/pcp/pct001                | ERISdb                          | 2013        | 11              | 0.000417727     |
| 640 | 20693604    | 10.2390/biecoll-jib-2010-144      | miReg                           | 2010        | 3               | 0.000416145     |
| 641 | 26358730    | 10.1093/bioinformatics/btv531     | ActMiR                          | 2016        | 6               | 0.000415978     |
| 642 | 22336709    | 10.4161/rna.19352                 | NRDR                            | 2012        | 6               | 0.000415978     |
| 643 | 25990732    | 10.1093/nar/gkv524                | StarScan                        | 2015        | 4               | 0.000415978     |
| 644 | 25863133    | 10.1016/j.ymeth.2015.04.003       | PlantMirnaT                     | 2015        | 4               | 0.000415978     |
| 645 | 25053842    | 10.1093/nar/gku598                | miRdentify                      | 2014        | 4               | 0.000415978     |
| 646 | 23184675    | 10.1002/jez.b.22483               | MirPlex                         | 2013        | 4               | 0.000415978     |
| 647 | 23174671    | 10.1016/j.ygeno.2012.11.005       | HomoTarget                      | 2013        | 4               | 0.000415978     |
| 648 | 24278370    | 10.1371/journal.pone.0081032      | miRHiC                          | 2013        | 1               | 0.000415978     |
| 649 | 23044543    | 10.1093/bioinformatics/bts587     | ncPRO-seq                       | 2012        | 23              | 0.000415712     |
| 650 | 24756070    | 10.1371/journal.pone.0095697      | tsmti                           | 2014        | 5               | 0.00041494      |
| 651 | 20482787    | 10.1186/1471-2105-11-260          | Screensaver                     | 2010        | 12              | 0.000413861     |
| 652 | 24243848    | 10.1093/nar/gkt1156               | miRNEST                         | 2014        | 6               | 0.000413155     |
| 653 | 23895117    | 10.1186/gb-2013-14-7-r79          | PARma                           | 2013        | 14              | 0.000412047     |
| 654 | 26577377    | 10.1261/rna.052167.115            | CLIPSeqTools                    | 2016        | 5               | 0.000412047     |
| 655 | 24838564    | 10.1093/nar/gku359                | IntaRNA                         | 2014        | 50              | 0.000410474     |
| 656 | 18842622    | 10.1093/nar/gkn709                | AthaMap                         | 2009        | 26              | 0.000410474     |

|     | <b>PMID</b> | <b>DOI</b>                         | <b>Name</b>         | <b>Year</b> | <b>Citation</b> | <b>Pagerank</b> |
|-----|-------------|------------------------------------|---------------------|-------------|-----------------|-----------------|
| 657 | 21422073    | 10.1093/bioinformatics/btr144      | mirSOM              | 2011        | 8               | 0.000410474     |
| 658 | 24134945    | 10.1016/j.jviromet.2013.10.013     | MISIS               | 2014        | 6               | 0.000410474     |
| 659 | 20939882    | 10.1186/1471-2105-11-506           | Geoseq              | 2010        | 3               | 0.000409832     |
| 660 | 25821974    | 10.1371/journal.pone.0121501       | iMcRNA              | 2015        | 46              | 0.000409099     |
| 661 | 25645238    | 10.1080/07391102.2015.1014422      | iMiRNA-PseDPC       | 2016        | 29              | 0.000409099     |
| 662 | 26362104    | 10.1016/j.jtbi.2015.08.025         | miRNA-deKmer        | 2015        | 27              | 0.000409099     |
| 663 | 23928704    | 10.1038/cddis.2013.292             | MNDR                | 2013        | 22              | 0.000409099     |
| 664 | 25715848    | 10.1039/c5mb00050e                 | miRNA-dis           | 2015        | 14              | 0.000409099     |
| 665 | 21326365    | 10.1139/G10-104                    | SolmiRNA            | 2011        | 12              | 0.000409099     |
| 666 | 25077573    | 10.1186/1471-2105-15-S7-S4         | targetS             | 2014        | 8               | 0.000409099     |
| 667 | 22024348    | 10.1016/j.oraloncology.2011.09.014 | HNOCDB              | 2012        | 5               | 0.000409099     |
| 668 | 21887016    | not applicable                     | miRTour             | 2011        | 4               | 0.000409099     |
| 669 | 26361498    | 10.1186/1753-6561-9-S6-S2          | miRTarVis           | 2015        | 3               | 0.000409099     |
| 670 | 25888698    | 10.1093/bib/bbv019                 | MIREAP              | 2015        | 14              | 0.00040871      |
| 671 | 21609960    | 10.1093/nar/gkr248                 | PETfold & PETcofold | 2011        | 9               | 0.000407885     |
| 672 | 21421552    | 10.1093/bioinformatics/btr132      | SplamiR             | 2011        | 2               | 0.000407565     |
| 673 | 22021901    | 10.1093/bib/bbr062                 | myMIR               | 2011        | 8               | 0.000407481     |
| 674 | 24682734    | 10.1093/database/bau023            | EpimiR              | 2014        | 7               | 0.000406806     |
| 675 | 26051695    | 10.1186/1471-2105-16-S9-S7         | ComiRNet            | 2015        | 2               | 0.00040584      |
| 676 | 25948580    | 10.1093/nar/gkv457                 | PACCMIT/PACCMIT-CDS | 2015        | 2               | 0.00040584      |
| 677 | 24372041    | 10.1142/S0219720013430129          | miRror-Suite        | 2013        | 2               | 0.00040584      |
| 678 | 23716633    | 10.1093/nar/gkt430                 | miRmap              | 2013        | 13              | 0.000404971     |
| 679 | 24519378    | 10.1093/bioinformatics/btu087      | SurvMicro           | 2014        | 11              | 0.000404971     |
| 680 | 23272654    | 10.1186/2043-9113-2-23             | PROGmiR             | 2012        | 9               | 0.000404971     |
| 681 | 23709495    | 10.1093/bioinformatics/btt296      | miRTCat             | 2013        | 6               | 0.000404971     |
| 682 | 26561006    | not applicable                     | iSRAP               | 2015        | 4               | 0.000404971     |
| 683 | 26553799    | 10.1093/nar/gkv1188                | DASHR               | 2016        | 3               | 0.000404971     |
| 684 | 25527098    | 10.1093/bioinformatics/btu833      | miRModule           | 2015        | 3               | 0.000404971     |
| 685 | 26690544    | 10.1038/oncsis.2015.40             | CancerNet           | 2015        | 2               | 0.000404971     |
| 686 | 26093049    | 10.1016/j.biosystems.2015.05.004   | miSEA               | 2015        | 2               | 0.00040468      |
| 687 | 25637560    | 10.1093/bioinformatics/btv061      | Omics Pipe          | 2015        | 13              | 0.000404185     |
| 688 | 25077952    | 10.1186/1471-2164-15-S3-S4         | miRandola           | 2014        | 7               | 0.000402818     |
| 689 | 23808606    | 10.1089/omi.2013.0011              | MirID               | 2013        | 2               | 0.00040222      |
| 690 | 27131362    | 10.1093/nar/gkw345                 | miEAA               | 2016        | 8               | 0.000400691     |
| 691 | 27089332    | 10.3390/ijms17040564               | miRTargetLink       | 2016        | 8               | 0.000400691     |
| 692 | 27687236    | 10.1080/15476286.2016.1234658      | TissueAtlas         | 2016        | 6               | 0.000400691     |
| 693 | 26354861    | 10.1093/nar/gkv871                 | mythology           | 2015        | 5               | 0.000400691     |
| 694 | 21531769    | 10.1093/bioinformatics/btr276      | Raccess             | 2011        | 14              | 0.000399468     |
| 695 | 19417063    | 10.1093/nar/gkp290                 | SNPinfo             | 2009        | 206             | 0.000388462     |
| 696 | 21036869    | 10.1093/nar/gkq1092                | DroID               | 2011        | 75              | 0.000388462     |
| 697 | 20484371    | 10.1093/nar/gkq418                 | ToppCluster         | 2010        | 65              | 0.000388462     |
| 698 | 27098042    | 10.1093/nar/gkw199                 | g:Profiler          | 2016        | 64              | 0.000388462     |
| 699 | 18787707    | 10.1371/journal.pone.0003197       | SIPHT               | 2008        | 64              | 0.000388462     |
| 700 | 26434508    | 10.1016/j.jmb.2015.09.019          | ExoCarta            | 2016        | 62              | 0.000388462     |
| 701 | 20372064    | 10.4161/cc.9.8.11202               | SiteSifter          | 2010        | 45              | 0.000388462     |
| 702 | 20424623    | 10.1038/mp.2009.93                 | SZGR                | 2010        | 44              | 0.000388462     |
| 703 | 23369107    | 10.1186/1471-2105-14-S2-S4         | RegRNA              | 2013        | 40              | 0.000388462     |

|     | <b>PMID</b> | <b>DOI</b>                    | <b>Name</b>                        | <b>Year</b> | <b>Citation</b> | <b>Pagerank</b> |
|-----|-------------|-------------------------------|------------------------------------|-------------|-----------------|-----------------|
| 704 | 23620284    | 10.1093/nar/gkt290            | RNAstructure                       | 2013        | 36              | 0.000388462     |
| 705 | 22745315    | 10.1242/dev.079939            | TRiP                               | 2012        | 36              | 0.000388462     |
| 706 | 19675096    | 10.1093/bioinformatics/btp486 | PerM                               | 2009        | 36              | 0.000388462     |
| 707 | 23175189    | 10.1038/cdd.2012.137          | MIRUMIR                            | 2013        | 32              | 0.000388462     |
| 708 | 24523238    | 10.1182/blood-2013-12-544692  | plateletomics                      | 2014        | 30              | 0.000388462     |
| 709 | 24753424    | 10.1093/nar/gku317            | TargetRNA                          | 2014        | 29              | 0.000388462     |
| 710 | 19948054    | 10.1186/1471-2105-10-392      | siDirect                           | 2009        | 29              | 0.000388462     |
| 711 | 21232146    | 10.1186/1751-0473-6-2         | SAMMate                            | 2011        | 28              | 0.000388462     |
| 712 | 19906709    | 10.1093/nar/gkp954            | USAGP                              | 2010        | 26              | 0.000388462     |
| 713 | 21109531    | 10.1093/nar/gkq1157           | MIPS PlantsDB                      | 2011        | 25              | 0.000388462     |
| 714 | 17547750    | 10.1186/1471-2105-8-180       | fast-db                            | 2007        | 24              | 0.000388462     |
| 715 | 26753561    | 10.1038/srep19062             | iMiRNA-SSF                         | 2016        | 23              | 0.000388462     |
| 716 | 26669964    | 10.1080/15476286.2015.1128065 | CircInteractome                    | 2016        | 22              | 0.000388462     |
| 717 | 22693211    | 10.1093/nar/gks572            | VARIANT                            | 2012        | 22              | 0.000388462     |
| 718 | 24039891    | 10.1371/journal.pone.0073240  | miRquant                           | 2013        | 21              | 0.000388462     |
| 719 | 25024350    | 10.1093/database/bau069       | OMICtools                          | 2014        | 20              | 0.000388462     |
| 720 | 19204784    | 10.1371/journal.pone.0004421  | Cepred                             | 2009        | 20              | 0.000388462     |
| 721 | 26450965    | 10.1093/nar/gkv940            | CircNet                            | 2016        | 19              | 0.000388462     |
| 722 | 22330228    | 10.1186/1756-0500-5-92        | microRNAviewer                     | 2012        | 19              | 0.000388462     |
| 723 | 26432828    | 10.1093/nar/gkv1007           | maizeGDB                           | 2016        | 18              | 0.000388462     |
| 724 | 22419780    | 10.1093/bioinformatics/bts128 | SEQanswers                         | 2012        | 18              | 0.000388462     |
| 725 | 23792952    | 10.1534/genetics.113.151340   | UP-TORR                            | 2013        | 17              | 0.000388462     |
| 726 | 21045062    | 10.1093/nar/gkq1066           | AHD                                | 2011        | 17              | 0.000388462     |
| 727 | 20422034    | 10.1371/journal.pone.0010180  | si-shRNA Selector                  | 2010        | 17              | 0.000388462     |
| 728 | 16381835    | 10.1093/nar/gkj051            | RNAi Codex                         | 2006        | 17              | 0.000388462     |
| 729 | 15888678    | 10.1104/pp.104.059196         | maizeGDB                           | 2005        | 17              | 0.000388462     |
| 730 | 23782616    | 10.1093/bioinformatics/btt356 | ChroMoS                            | 2013        | 16              | 0.000388462     |
| 731 | 18492270    | 10.1186/1471-2105-9-243       | MD-SeeGH                           | 2008        | 16              | 0.000388462     |
| 732 | 26516186    | 10.1093/nar/gkv1123           | NCG                                | 2016        | 15              | 0.000388462     |
| 733 | 25010047    | 10.1371/journal.pone.0101239  | GBM-BioDP                          | 2014        | 15              | 0.000388462     |
| 734 | 21810899    | 10.1093/bioinformatics/btr447 | SEED                               | 2011        | 15              | 0.000388462     |
| 735 | 16956394    | 10.1186/1471-2105-7-404       | RDMAS                              | 2006        | 15              | 0.000388462     |
| 736 | 26424082    | 10.1093/database/bav095       | RegNetwork                         | 2015        | 14              | 0.000388462     |
| 737 | 20823333    | 10.1093/bioinformatics/btq395 | ProNet                             | 2010        | 14              | 0.000388462     |
| 738 | 19778453    | 10.1186/1471-2350-10-102      | AGD                                | 2009        | 14              | 0.000388462     |
| 739 | 16845046    | 10.1093/nar/gkl214            | siVirus                            | 2006        | 14              | 0.000388462     |
| 740 | 24810850    | 10.1093/nar/gku370            | mrsFAST                            | 2014        | 13              | 0.000388462     |
| 741 | 22672776    | 10.1186/1752-0509-6-56        | Centratliy-based Pathway Enrichmen | 2012        | 13              | 0.000388462     |
| 742 | 17178752    | 10.1093/nar/gkl1011           | GenomeTraFac                       | 2007        | 13              | 0.000388462     |
| 743 | 25031655    | 10.7150/jgen.3996             | fat_deposition                     | 2013        | 12              | 0.000388462     |
| 744 | 22941647    | 10.1093/nar/gks797            | siSPOTR                            | 2013        | 12              | 0.000388462     |
| 745 | 22693220    | 10.1093/nar/gks575            | CellBase                           | 2012        | 12              | 0.000388462     |
| 746 | 22608002    | 10.1186/1756-0500-5-246       | RCDB                               | 2012        | 12              | 0.000388462     |
| 747 | 19897564    | 10.1093/bioinformatics/btp598 | T-REX                              | 2010        | 12              | 0.000388462     |
| 748 | 26271990    | 10.1093/nar/gkv808            | BCGSC miRNA Profiling Pipeline     | 2016        | 11              | 0.000388462     |
| 749 | 24839966    | 10.4161/cbt.29188             | Pancreatic Cancer Database         | 2014        | 11              | 0.000388462     |
| 750 | 19450266    | 10.1186/1471-2105-10-151      | MIMAS                              | 2009        | 11              | 0.000388462     |



|     | <b>PMID</b> | <b>DOI</b>                      | <b>Name</b>                              | <b>Year</b> | <b>Citation</b> | <b>Pagerank</b> |
|-----|-------------|---------------------------------|------------------------------------------|-------------|-----------------|-----------------|
| 751 | 17545196    | 10.1093/nar/gkm381              | GeneHub-GEPIS                            | 2007        | 11              | 0.000388462     |
| 752 | 24466070    | 10.1371/journal.pone.0086387    | TGRD                                     | 2014        | 10              | 0.000388462     |
| 753 | 23418540    | 10.1371/journal.pone.0056228    | canEvolve                                | 2013        | 10              | 0.000388462     |
| 754 | 23324169    | 10.1093/pcp/pct004              | Orchidstra                               | 2013        | 10              | 0.000388462     |
| 755 | 23268829    | 10.1186/gb-2012-13-12-r125      | RIDDLE                                   | 2012        | 10              | 0.000388462     |
| 756 | 22802706    | 10.1590/S1415-47572012000200002 | A web-based bioinformatics interface app | 2012        | 10              | 0.000388462     |
| 757 | 17986455    | 10.1093/nar/gkm946              | UTRome.org                               | 2008        | 10              | 0.000388462     |
| 758 | 27087310    | 10.1093/database/baw057         | NPInter                                  | 2016        | 9               | 0.000388462     |
| 759 | 25635527    | 10.4161/15548627.2014.994346    | ARN (Autophagy)                          | 2015        | 9               | 0.000388462     |
| 760 | 24875477    | 10.1093/nar/gku465              | TriplexRna                               | 2014        | 9               | 0.000388462     |
| 761 | 24865352    | 10.1093/database/bau042         | Structuring osteosarcoma knowledge       | 2014        | 9               | 0.000388462     |
| 762 | 24185698    | 10.1093/nar/gkt1061             | LSD                                      | 2014        | 9               | 0.000388462     |
| 763 | 19958507    | 10.1186/1471-2164-10-S3-S9      | TTS mapping                              | 2009        | 9               | 0.000388462     |
| 764 | 18474525    | 10.1093/nar/gkn297              | pssRNAMiner                              | 2008        | 9               | 0.000388462     |
| 765 | 23863844    | 10.1093/nar/gkt629              | MREdictor                                | 2013        | 8               | 0.000388462     |
| 766 | 23772050    | 10.1093/bioinformatics/btt341   | MCMG                                     | 2013        | 8               | 0.000388462     |
| 767 | 22759612    | 10.1186/1471-2164-13-S3-S3      | imiRTP                                   | 2012        | 8               | 0.000388462     |
| 768 | 22216218    | 10.1371/journal.pone.0029217    | Pipeline to analyze Illumina reads       | 2011        | 8               | 0.000388462     |
| 769 | 22046244    | 10.1371/journal.pone.0025642    | MysiRNA-designer                         | 2011        | 8               | 0.000388462     |
| 770 | 27936097    | 10.1371/journal.pone.0167698    | PeTMbase                                 | 2016        | 7               | 0.000388462     |
| 771 | 27175019    | 10.1534/g3.116.030452           | ShortStack                               | 2016        | 7               | 0.000388462     |
| 772 | 26030752    | 10.1371/journal.pone.0128089    | DMD                                      | 2015        | 7               | 0.000388462     |
| 773 | 24997141    | 10.1093/database/bau065         | ChiloDB                                  | 2014        | 7               | 0.000388462     |
| 774 | 24244721    | 10.1371/journal.pone.0080844    | MirStress                                | 2013        | 7               | 0.000388462     |
| 775 | 24019896    | 10.1371/journal.pone.0073074    | netClass                                 | 2013        | 7               | 0.000388462     |
| 776 | 23174015    | 10.1186/1471-2105-13-311        | Bioinformatics Resource Manager          | 2012        | 7               | 0.000388462     |
| 777 | 22693210    | 10.1093/nar/gks573              | RENATO                                   | 2012        | 7               | 0.000388462     |
| 778 | 20465802    | 10.1186/1471-2105-11-249        | BiTargeting                              | 2010        | 7               | 0.000388462     |
| 779 | 18194551    | 10.1186/1471-2105-9-21          | LeARN                                    | 2008        | 7               | 0.000388462     |
| 780 | 17064417    | 10.1186/gb-2006-7-10-r97        | GeneACT                                  | 2006        | 7               | 0.000388462     |
| 781 | 26503253    | 10.1093/nar/gkv1107             | rVarBase                                 | 2016        | 6               | 0.000388462     |
| 782 | 26490638    | 10.1093/database/bav102         | MtiBase                                  | 2015        | 6               | 0.000388462     |
| 783 | 25707690    | 10.1186/1752-0509-9-S1-S5       | TMMN                                     | 2015        | 6               | 0.000388462     |
| 784 | 23696878    | 10.1371/journal.pone.0064289    | PEpiD                                    | 2013        | 6               | 0.000388462     |
| 785 | 23281648    | 10.1186/1471-2164-13-S7-S16     | C-mii                                    | 2012        | 6               | 0.000388462     |
| 786 | 23044546    | 10.1093/bioinformatics/bts589   | miR-EdiTAr                               | 2012        | 6               | 0.000388462     |
| 787 | 22800758    | 10.1186/1756-0381-5-7           | AthaMap                                  | 2012        | 6               | 0.000388462     |
| 788 | 22139933    | 10.1093/nar/gkr1183             | IGDB.NSCLC                               | 2012        | 6               | 0.000388462     |
| 789 | 22784580    | 10.1186/1752-0509-5-S2-S9       | miR2Gene                                 | 2011        | 6               | 0.000388462     |
| 790 | 21666272    | 10.1093/database/bar024         | PED                                      | 2011        | 6               | 0.000388462     |
| 791 | 18377655    | 10.1186/1748-7188-3-3           | SBM                                      | 2008        | 6               | 0.000388462     |
| 792 | 17076887    | 10.1186/1471-2105-7-480         | RiboSubstrates                           | 2006        | 6               | 0.000388462     |
| 793 | 27924033    | 10.1093/nar/gkw965              | ChIPBase                                 | 2017        | 5               | 0.000388462     |
| 794 | 27742822    | 10.1093/nar/gkw926              | miRPathDB                                | 2017        | 5               | 0.000388462     |
| 795 | 27329603    | 10.18632/oncotarget.10052       | SMiR-NBI                                 | 2016        | 5               | 0.000388462     |
| 796 | 27323856    | 10.18632/oncotarget.10012       | IntNetLncSim                             | 2016        | 5               | 0.000388462     |
| 797 | 27167008    | 10.1038/srep25749               | miARma-Seq                               | 2016        | 5               | 0.000388462     |

|     | <b>PMID</b> | <b>DOI</b>                    | <b>Name</b>            | <b>Year</b> | <b>Citation</b> | <b>Pagerank</b> |
|-----|-------------|-------------------------------|------------------------|-------------|-----------------|-----------------|
| 798 | 27105848    | 10.1093/nar/gkw288            | miRNet                 | 2016        | 5               | 0.000388462     |
| 799 | 25982314    | 10.1093/database/bav044       | GermIncRNA             | 2015        | 5               | 0.000388462     |
| 800 | 25981679    | 10.1186/s12864-015-1610-5     | miRVine                | 2015        | 5               | 0.000388462     |
| 801 | 25566534    | 10.3389/fbioe.2014.00071      | ncPred                 | 2014        | 5               | 0.000388462     |
| 802 | 25114903    | 10.1155/2014/462135           | miRSeq                 | 2014        | 5               | 0.000388462     |
| 803 | 24623808    | 10.1093/nar/gku207            | Vicinal                | 2014        | 5               | 0.000388462     |
| 804 | 24507755    | 10.1186/1471-2164-15-117      | CSZ                    | 2014        | 5               | 0.000388462     |
| 805 | 23956262    | 10.1105/tpc.113.112805        | PHANTOM                | 2013        | 5               | 0.000388462     |
| 806 | 23282032    | 10.1186/1471-2164-13-S8-S13   | BCmicrO                | 2012        | 5               | 0.000388462     |
| 807 | 21498399    | 10.1093/bioinformatics/btr180 | BeadSme                | 2011        | 5               | 0.000388462     |
| 808 | 21143779    | 10.1186/1471-2164-11-S3-S12   | expmicro               | 2010        | 5               | 0.000388462     |
| 809 | 17925013    | 10.1186/1471-2172-8-25        | MixDTrees              | 2007        | 5               | 0.000388462     |
| 810 | 15980545    | 10.1093/nar/gki382            | RNALOSS                | 2005        | 5               | 0.000388462     |
| 811 | 27332714    | 10.1371/journal.pntd.0004817  | ZIKV-CDB               | 2016        | 4               | 0.000388462     |
| 812 | 27198221    | 10.1093/nar/gkw443            | spongeScan             | 2016        | 4               | 0.000388462     |
| 813 | 26382195    | 10.1093/bioinformatics/btv534 | P-SAMS                 | 2016        | 4               | 0.000388462     |
| 814 | 26084703    | 10.1007/s00335-015-9571-1     | MGD/MGI                | 2015        | 4               | 0.000388462     |
| 815 | 26007652    | 10.1093/nar/gkv537            | Tailor                 | 2015        | 4               | 0.000388462     |
| 816 | 25540777    | 10.3389/fbioe.2014.00069      | ncRNA-DB               | 2014        | 4               | 0.000388462     |
| 817 | 25294834    | 10.1093/nar/gku916            | COGERE                 | 2014        | 4               | 0.000388462     |
| 818 | 25120561    | 10.3389/fgene.2014.00249      | HumanViCe              | 2014        | 4               | 0.000388462     |
| 819 | 25081207    | 10.1093/nar/gku672            | MixMir                 | 2014        | 4               | 0.000388462     |
| 820 | 24970281    | 10.1186/1756-0500-7-403       | VetBioBase             | 2014        | 4               | 0.000388462     |
| 821 | 24627222    | 10.1093/nar/gku202            | miR-Synth              | 2014        | 4               | 0.000388462     |
| 822 | 23874353    | 10.3389/fgene.2013.00133      | mirdba                 | 2013        | 4               | 0.000388462     |
| 823 | 23584836    | 10.1093/database/bat024       | hLGDB                  | 2013        | 4               | 0.000388462     |
| 824 | 22995832    | 10.4161/rna.22035             | ptrguide               | 2012        | 4               | 0.000388462     |
| 825 | 21685046    | 10.1093/bioinformatics/btr359 | HTSmix                 | 2011        | 4               | 0.000388462     |
| 826 | 20015389    | 10.1186/1471-2105-10-427      | miRNA_code             | 2009        | 4               | 0.000388462     |
| 827 | 28289155    | 10.1261/rna.059360.116        | The UEA sRNA workbench | 2017        | 3               | 0.000388462     |
| 828 | 28053168    | 10.1093/nar/gkw910            | ccNET                  | 2017        | 3               | 0.000388462     |
| 829 | 27899556    | 10.1093/nar/gkw1079           | dbDEMC                 | 2017        | 3               | 0.000388462     |
| 830 | 27794554    | 10.1093/nar/gkw1008           | RNAcentral             | 2017        | 3               | 0.000388462     |
| 831 | 27651464    | 10.1093/nar/gkw835            | LNCediting             | 2017        | 3               | 0.000388462     |
| 832 | 27628216    | 10.1095/biolreprod.116.142190 | SpermBase              | 2016        | 3               | 0.000388462     |
| 833 | 26902267    | 10.1038/ncomms10578           | CARD                   | 2016        | 3               | 0.000388462     |
| 834 | 26384425    | 10.1093/nar/gkv921            | miRVaS                 | 2016        | 3               | 0.000388462     |
| 835 | 26472186    | 10.18632/oncotarget.5341      | SubpathwayGMir         | 2015        | 3               | 0.000388462     |
| 836 | 26130578    | 10.1093/bioinformatics/btv392 | miRNALasso             | 2015        | 3               | 0.000388462     |
| 837 | 25888201    | 10.1186/s12859-015-0495-2     | BiLTR                  | 2015        | 3               | 0.000388462     |
| 838 | 25541727    | 10.1371/journal.pone.0115585  | ReNE                   | 2014        | 3               | 0.000388462     |
| 839 | 25344116    | 10.1186/1476-4598-13-241      | OvMark                 | 2014        | 3               | 0.000388462     |
| 840 | 24106090    | 10.1093/nar/gkt901            | Laminin database       | 2014        | 3               | 0.000388462     |
| 841 | 23475422    | 10.1007/s10059-013-2165-4     | miRTar Hunter          | 2013        | 3               | 0.000388462     |
| 842 | 23298515    | 10.1186/1751-0473-8-1         | MmPalateMiRNA          | 2013        | 3               | 0.000388462     |
| 843 | 22493538    | 10.6026/97320630008284        | Ssa miRNAs DB          | 2012        | 3               | 0.000388462     |
| 844 | 22115078    | 10.1186/1471-2105-12-454      | miREE                  | 2011        | 3               | 0.000388462     |

|     | <b>PMID</b> | <b>DOI</b>                    | <b>Name</b>                | <b>Year</b> | <b>Citation</b> | <b>Pagerank</b> |
|-----|-------------|-------------------------------|----------------------------|-------------|-----------------|-----------------|
| 845 | 21342555    | 10.1186/1471-2105-12-S1-S25   | GARNET                     | 2011        | 3               | 0.000388462     |
| 846 | 16584563    | 10.1186/1471-2105-7-185       | Ebbie                      | 2006        | 3               | 0.000388462     |
| 847 | 28361682    | 10.1186/s12859-017-1467-5     | miRSM                      | 2017        | 2               | 0.000388462     |
| 848 | 28317029    | 10.1128/mSystems.00186-16     | Listeriomics               | 2017        | 2               | 0.000388462     |
| 849 | 28180281    | 10.1093/nar/gkw1031           | miratlas                   | 2017        | 2               | 0.000388462     |
| 850 | 28108660    | 10.1093/nar/gkx007            | miRBShunter                | 2017        | 2               | 0.000388462     |
| 851 | 28053162    | 10.1093/nar/gkw888            | POSTAR                     | 2017        | 2               | 0.000388462     |
| 852 | 27899625    | 10.1093/nar/gkw1084           | YM500                      | 2017        | 2               | 0.000388462     |
| 853 | 27887571    | 10.1186/s12859-016-1353-6     | LBSIZEcleav                | 2016        | 2               | 0.000388462     |
| 854 | 27852308    | 10.1186/s12943-016-0554-y     | LMMEL-miR-miner            | 2016        | 2               | 0.000388462     |
| 855 | 27766940    | 10.1186/s12859-016-1223-2     | miRLiN                     | 2016        | 2               | 0.000388462     |
| 856 | 27603513    | 10.1080/15476286.2016.1229733 | SMEpred workbench          | 2016        | 2               | 0.000388462     |
| 857 | 27438777    | 10.1371/journal.pcbi.1005026  | chimiRic                   | 2016        | 2               | 0.000388462     |
| 858 | 27352859    | 10.1093/database/baw099       | SorghumFDB                 | 2016        | 2               | 0.000388462     |
| 859 | 27341078    | 10.1038/bcj.2016.47           | PMF NETWORK MODEL          | 2016        | 2               | 0.000388462     |
| 860 | 27189211    | 10.1186/s12864-016-2695-1     | TargetExpress              | 2016        | 2               | 0.000388462     |
| 861 | 27035433    | 10.1371/journal.pone.0152792  | WSNF                       | 2016        | 2               | 0.000388462     |
| 862 | 27000067    | 10.1186/s12859-016-0987-8     | miRcomp                    | 2016        | 2               | 0.000388462     |
| 863 | 26909679    | 10.1371/journal.pone.0149747  | DsTRD                      | 2016        | 2               | 0.000388462     |
| 864 | 26825463    | 10.1093/nar/gkw043            | MiREN                      | 2016        | 2               | 0.000388462     |
| 865 | 26589271    | 10.1093/bioinformatics/btv682 | RNAstructure               | 2016        | 2               | 0.000388462     |
| 866 | 26377073    | 10.1093/bioinformatics/btv544 | iNMF                       | 2016        | 2               | 0.000388462     |
| 867 | 26627005    | 10.1186/s12859-015-0827-2     | PC-TraFF                   | 2015        | 2               | 0.000388462     |
| 868 | 26383775    | 10.1080/15476286.2015.1068496 | SimiRa                     | 2015        | 2               | 0.000388462     |
| 869 | 26046581    | 10.1186/1471-2164-16-S6-S4    | targetrunningsum           | 2015        | 2               | 0.000388462     |
| 870 | 25903161    | 10.1186/s12864-015-1490-8     | UQAM Wheat microRNA Portal | 2015        | 2               | 0.000388462     |
| 871 | 25838840    | 10.1186/s13029-015-0035-5     | MagiCMicroRna              | 2015        | 2               | 0.000388462     |
| 872 | 25813044    | 10.1093/nar/gkv256            | SubmiRine                  | 2015        | 2               | 0.000388462     |
| 873 | 25566282    | 10.3389/fpls.2014.00708       | plantDARIO                 | 2014        | 2               | 0.000388462     |
| 874 | 25425035    | 10.1093/database/bau115       | microPIR                   | 2014        | 2               | 0.000388462     |
| 875 | 24947752    | 10.1093/bioinformatics/btu396 | PGS                        | 2014        | 2               | 0.000388462     |
| 876 | 24907353    | 10.1093/database/bau043       | miRror-Suite               | 2014        | 2               | 0.000388462     |
| 877 | 24886675    | 10.1186/1756-0500-7-302       | ExiMiR                     | 2014        | 2               | 0.000388462     |
| 878 | 24428888    | 10.1186/1471-2105-15-15       | OncomiRdbB                 | 2014        | 2               | 0.000388462     |
| 879 | 24267917    | 10.1186/1471-2105-14-S14-S17  | mirCoX                     | 2013        | 2               | 0.000388462     |
| 880 | 23282099    | 10.1186/1471-2164-13-S8-S15   | miRCluster                 | 2012        | 2               | 0.000388462     |
| 881 | 23281624    | 10.1186/1471-2164-13-S7-S15   | MicroLive                  | 2012        | 2               | 0.000388462     |
| 882 | 19958497    | 10.1186/1471-2164-10-S3-S32   | PDbase                     | 2009        | 2               | 0.000388462     |
| 883 | 29036314    | 10.1093/nar/gkx836            | Mirnov0                    | 2017        | 1               | 0.000388462     |
| 884 | 28877962    | 10.1101/gr.222067.117         | microRNAome                | 2017        | 1               | 0.000388462     |
| 885 | 28263989    | 10.1371/journal.pone.0171929  | IBRel                      | 2017        | 1               | 0.000388462     |
| 886 | 28245811    | 10.1186/s12859-017-1561-8     | iDeep                      | 2017        | 1               | 0.000388462     |
| 887 | 28203233    | 10.3389/fmicb.2017.00126      | Exo-miRExplorer            | 2017        | 1               | 0.000388462     |
| 888 | 28124972    | 10.7554/eLife.18541           | TPS                        | 2017        | 1               | 0.000388462     |
| 889 | 28079125    | 10.1038/srep40367             | CKDdb                      | 2017        | 1               | 0.000388462     |
| 890 | 28077569    | 10.1093/database/baw167       | RAIN                       | 2017        | 1               | 0.000388462     |
| 891 | 28053167    | 10.1093/nar/gkw916            | PceRBase                   | 2017        | 1               | 0.000388462     |

|     | <b>PMID</b> | <b>DOI</b>                    | <b>Name</b>                           | <b>Year</b> | <b>Citation</b> | <b>Pagerank</b> |
|-----|-------------|-------------------------------|---------------------------------------|-------------|-----------------|-----------------|
| 892 | 28045122    | 10.1038/srep39684             | miRsig                                | 2017        | 1               | 0.000388462     |
| 893 | 27986855    | 10.1093/nar/gkw1260           | miSTAR                                | 2017        | 1               | 0.000388462     |
| 894 | 27899600    | 10.1093/nar/gkw1085           | MirAncestar                           | 2017        | 1               | 0.000388462     |
| 895 | 28105918    | 10.1186/s12859-016-1343-8     | Miracle                               | 2016        | 1               | 0.000388462     |
| 896 | 27857164    | 10.1038/srep36625             | miRNAsong                             | 2016        | 1               | 0.000388462     |
| 897 | 27852242    | 10.1186/s12864-016-3287-9     | AnnoLnc                               | 2016        | 1               | 0.000388462     |
| 898 | 27756204    | 10.1186/s12859-016-1280-6     | RNAdualfPF                            | 2016        | 1               | 0.000388462     |
| 899 | 27623959    | 10.1186/s12859-016-1251-y     | BmncRNadb                             | 2016        | 1               | 0.000388462     |
| 900 | 27477450    | 10.1038/srep30624             | gbCRC                                 | 2016        | 1               | 0.000388462     |
| 901 | 27330136    | 10.1093/nar/gkw554            | HiTSeekR                              | 2016        | 1               | 0.000388462     |
| 902 | 27242364    | 10.1093/nar/gkw459            | miRNAFold                             | 2016        | 1               | 0.000388462     |
| 903 | 27233515    | 10.1186/s12859-016-1036-3     | Automatic learning of pre-miRNAs from | 2016        | 1               | 0.000388462     |
| 904 | 27207881    | 10.1093/nar/gkw455            | DIANA-mirExTra                        | 2016        | 1               | 0.000388462     |
| 905 | 27144897    | 10.1080/15476286.2016.1182279 | STarMirDB                             | 2016        | 1               | 0.000388462     |
| 906 | 27122020    | 10.1186/s12859-016-1057-y     | ImiRP                                 | 2016        | 1               | 0.000388462     |
| 907 | 27091357    | 10.1186/s12859-016-1002-0     | ChemiRs                               | 2016        | 1               | 0.000388462     |
| 908 | 27082112    | 10.1371/journal.pone.0153658  | Infinity                              | 2016        | 1               | 0.000388462     |
| 909 | 27059647    | 10.1186/s12859-016-0964-2     | CyTRANSFINDER                         | 2016        | 1               | 0.000388462     |
| 910 | 26973449    | 10.3389/fnins.2016.00071      | BBBomics                              | 2016        | 1               | 0.000388462     |
| 911 | 26967326    | 10.1371/journal.pone.0151127  | MiRComb                               | 2016        | 1               | 0.000388462     |
| 912 | 26861761    | 10.1038/srep20678             | imRNA                                 | 2016        | 1               | 0.000388462     |
| 913 | 26558614    | 10.1371/journal.pone.0142753  | miRLocator                            | 2015        | 1               | 0.000388462     |
| 914 | 26538106    | 10.1186/s12859-015-0789-4     | PPImiRFS                              | 2015        | 1               | 0.000388462     |
| 915 | 26506012    | 10.1371/journal.pone.0138313  | Xenbase                               | 2015        | 1               | 0.000388462     |
| 916 | 26434581    | 10.1038/srep14617             | mirPRO                                | 2015        | 1               | 0.000388462     |
| 917 | 26384373    | 10.1093/database/bav086       | FARE-CAFE                             | 2015        | 1               | 0.000388462     |
| 918 | 26228432    | 10.1093/database/bav069       | OCDB                                  | 2015        | 1               | 0.000388462     |
| 919 | 26169944    | 10.1186/s12967-015-0594-x     | miFRame                               | 2015        | 1               | 0.000388462     |
| 920 | 26163062    | 10.1093/nar/gkv698            | SMIRP                                 | 2015        | 1               | 0.000388462     |
| 921 | 26072489    | 10.1093/bioinformatics/btv265 | PAGER                                 | 2015        | 1               | 0.000388462     |
| 922 | 25910695    | 10.1093/bioinformatics/btv220 | sydSeq                                | 2015        | 1               | 0.000388462     |
| 923 | 25889518    | 10.1186/s13104-015-1052-9     | miREC                                 | 2015        | 1               | 0.000388462     |
| 924 | 25708359    | 10.1186/1471-2105-16-S1-S9    | ViralmiR                              | 2015        | 1               | 0.000388462     |
| 925 | 25577435    | 10.1093/bioinformatics/btu853 | ENViz                                 | 2015        | 1               | 0.000388462     |
| 926 | 25303994    | 10.1093/nar/gku918            | ptRNApred                             | 2014        | 1               | 0.000388462     |
| 927 | 24874743    | 10.1038/cddis.2014.236        | CREAM                                 | 2014        | 1               | 0.000388462     |
| 928 | 24618044    | 10.1093/database/bau019       | SoyFN                                 | 2014        | 1               | 0.000388462     |
| 929 | 24145223    | 10.1016/j.ymeth.2013.10.002   | CoRAL                                 | 2014        | 1               | 0.000388462     |
| 930 | 24391592    | 10.3389/fphys.2013.00361      | genYsis Toolbox                       | 2013        | 1               | 0.000388462     |
| 931 | 24223834    | 10.1371/journal.pone.0078624  | iSubgraph                             | 2013        | 1               | 0.000388462     |
| 932 | 23814141    | 10.1093/bioinformatics/btt358 | SbacHTS                               | 2013        | 1               | 0.000388462     |
| 933 | 23809014    | 10.1186/1687-4153-2013-9      | H-RVM                                 | 2013        | 1               | 0.000388462     |
| 934 | 23396300    | 10.1093/database/bat001       | pseudoMap                             | 2013        | 1               | 0.000388462     |
| 935 | 23151045    | 10.1186/1471-2164-13-620      | MMpred                                | 2012        | 1               | 0.000388462     |
| 936 | 21970648    | 10.1186/1471-2164-12-483      | Ortho2ExpressMatrix                   | 2011        | 1               | 0.000388462     |
| 937 | 21904438    | not applicable                | Antagomirbase                         | 2011        | 1               | 0.000388462     |
| 938 | 20691398    | 10.1016/S1672-0229(10)60014-9 | PsRNA                                 | 2010        | 1               | 0.000388462     |

|     | <b>PMID</b> | <b>DOI</b>                    | <b>Name</b>              | <b>Year</b> | <b>Citation</b> | <b>Pagerank</b> |
|-----|-------------|-------------------------------|--------------------------|-------------|-----------------|-----------------|
| 939 | 20529917    | 10.1093/bioinformatics/btq218 | rna-wl                   | 2010        | 1               | 0.000388462     |
| 940 | 17683571    | 10.1186/1471-2105-8-285       | miRAS                    | 2007        | 1               | 0.000388462     |
| 941 | 17663795    | 10.1186/1471-2164-8-257       | RScan                    | 2007        | 1               | 0.000388462     |
| 942 | 29290807    | 10.7150/thno.22065            | Tiresias                 | 2018        | 0               | 0.000388462     |
| 943 | 29233191    | 10.1186/s12967-017-1340-3     | MKRMDA                   | 2017        | 0               | 0.000388462     |
| 944 | 29220447    | 10.1093/database/bax053       | miRIAD                   | 2017        | 0               | 0.000388462     |
| 945 | 29220434    | 10.1093/database/bax042       | decodeRNA                | 2017        | 0               | 0.000388462     |
| 946 | 29158627    | 10.1007/s12298-017-0470-7     | VmTDB                    | 2017        | 0               | 0.000388462     |
| 947 | 29156009    | 10.1093/nar/gkx1072           | Lethal microRNA database | 2017        | 0               | 0.000388462     |
| 948 | 29137601    | 10.1186/s12859-017-1924-1     | RWRMTN                   | 2017        | 0               | 0.000388462     |
| 949 | 29069500    | 10.1093/nar/gkx999            | sRNAlyzer                | 2017        | 0               | 0.000388462     |
| 950 | 29036674    | 10.1093/nar/gkx834            | miRvial                  | 2017        | 0               | 0.000388462     |
| 951 | 28984182    | 10.1186/s12859-017-1801-y     | Read-Split-Fly           | 2017        | 0               | 0.000388462     |
| 952 | 28911111    | 10.1093/nar/gkx605            | metaMIR                  | 2017        | 0               | 0.000388462     |
| 953 | 28911107    | 10.1093/nar/gkx595            | miRMaster                | 2017        | 0               | 0.000388462     |
| 954 | 28874117    | 10.1186/s12859-017-1812-8     | BUFET                    | 2017        | 0               | 0.000388462     |
| 955 | 28830358    | 10.1186/s12864-017-4031-9     | unitas                   | 2017        | 0               | 0.000388462     |
| 956 | 28821014    | 10.1371/journal.pcbi.1005703  | findr                    | 2017        | 0               | 0.000388462     |
| 957 | 28785313    | 10.1186/s13040-017-0148-2     | nRC                      | 2017        | 0               | 0.000388462     |
| 958 | 28774263    | 10.1186/s12859-017-1772-z     | isomiR-Benchmark         | 2017        | 0               | 0.000388462     |
| 959 | 28761062    | 10.1038/s41598-017-07238-0    | T2DiACoD                 | 2017        | 0               | 0.000388462     |
| 960 | 28704505    | 10.1371/journal.pone.0181231  | CSmiRTar                 | 2017        | 0               | 0.000388462     |
| 961 | 28605773    | 10.1093/database/bax037       | BioM2MetDisease          | 2017        | 0               | 0.000388462     |
| 962 | 28605770    | 10.1093/database/bax030       | ODIN-bc2015-miRNA        | 2017        | 0               | 0.000388462     |
| 963 | 28377776    | 10.3389/fpls.2017.00322       | isomiR2Function          | 2017        | 0               | 0.000388462     |
| 964 | 28365733    | 10.1093/database/bax015       | miRnalyze                | 2017        | 0               | 0.000388462     |
| 965 | 28362846    | 10.1371/journal.pone.0174999  | contextMMIA              | 2017        | 0               | 0.000388462     |
| 966 | 28350385    | 10.1038/sdata.2017.30         | PCBC                     | 2017        | 0               | 0.000388462     |
| 967 | 28336542    | 10.1261/rna.059089.116        | Seten                    | 2017        | 0               | 0.000388462     |
| 968 | 28327601    | 10.1038/srep45235             | BCIP                     | 2017        | 0               | 0.000388462     |
| 969 | 28320324    | 10.1186/s12859-017-1601-4     | QuickMIRSeq              | 2017        | 0               | 0.000388462     |
| 970 | 28294141    | 10.1038/srep44085             | GEAR                     | 2017        | 0               | 0.000388462     |
| 971 | 28271066    | 10.1155/2017/6037168          | RNA-Seq Viewer           | 2017        | 0               | 0.000388462     |
| 972 | 28134831    | 10.3390/ijms18020274          | SpidermiR                | 2017        | 0               | 0.000388462     |
| 973 | 28103241    | 10.1371/journal.pcbi.1005340  | icTAIR                   | 2017        | 0               | 0.000388462     |
| 974 | 28030833    | 10.18632/oncotarget.14054     | miRMaster                | 2017        | 0               | 0.000388462     |
| 975 | 27903911    | 10.1093/nar/gkw1185           | miRTar2GO                | 2017        | 0               | 0.000388462     |
| 976 | 27899613    | 10.1093/nar/gkw1038           | NSDNA                    | 2017        | 0               | 0.000388462     |
| 977 | 27899583    | 10.1093/nar/gkw1037           | XTalkDB                  | 2017        | 0               | 0.000388462     |
| 978 | 28185545    | 10.1186/s12859-016-1171-x     | MiRNATIP                 | 2016        | 0               | 0.000388462     |
| 979 | 28025342    | 10.1093/database/baw151       | RiceATM                  | 2016        | 0               | 0.000388462     |
| 980 | 28002428    | 10.1371/journal.pone.0168392  | mirMeta                  | 2016        | 0               | 0.000388462     |
| 981 | 27982098    | 10.1038/srep39347             | ARN (Adipogenesis)       | 2016        | 0               | 0.000388462     |
| 982 | 27766936    | 10.1186/s12859-016-1219-y     | MMiRNA-Viewer            | 2016        | 0               | 0.000388462     |
| 983 | 27665594    | 10.1007/978-1-4939-6433-8_6   | STarMir                  | 2016        | 0               | 0.000388462     |
| 984 | 27503118    | 10.1186/s12918-016-0321-0     | ARN (Adipogenesis)       | 2016        | 0               | 0.000388462     |
| 985 | 27474169    | 10.18632/oncotarget.10839     | MiRSEA                   | 2016        | 0               | 0.000388462     |

|      | <b>PMID</b> | <b>DOI</b>                     | <b>Name</b>             | <b>Year</b> | <b>Citation</b> | <b>Pagerank</b> |
|------|-------------|--------------------------------|-------------------------|-------------|-----------------|-----------------|
| 986  | 27307639    | 10.1093/bioinformatics/btw273  | SHARAKU                 | 2016        | 0               | 0.000388462     |
| 987  | 27275538    | 10.18632/oncotarget.9788       | MITHrIL                 | 2016        | 0               | 0.000388462     |
| 988  | 27213017    | 10.1186/s13040-016-0099-z      | SePIA                   | 2016        | 0               | 0.000388462     |
| 989  | 27207945    | 10.1093/bioinformatics/btw318  | TarPmiR                 | 2016        | 0               | 0.000388462     |
| 990  | 27170328    | 10.1186/s12859-016-1070-1      | LimiTT                  | 2016        | 0               | 0.000388462     |
| 991  | 27110275    | 10.1186/s13015-016-0071-y      | SparseMFEFold           | 2016        | 0               | 0.000388462     |
| 992  | 27081157    | 10.1093/database/baw060        | PmiRExAt                | 2016        | 0               | 0.000388462     |
| 993  | 26989154    | 10.1093/database/baw023        | CSCdb                   | 2016        | 0               | 0.000388462     |
| 994  | 26732371    | 10.1038/srep18901              | miRNA Digger            | 2016        | 0               | 0.000388462     |
| 995  | 26623179    | 10.7717/peerj.1332             | miRMOD                  | 2015        | 0               | 0.000388462     |
| 996  | 26613105    | not applicable                 | SMiRK                   | 2015        | 0               | 0.000388462     |
| 997  | 26229293    | 10.6026/97320630011316         | Ginger Est              | 2015        | 0               | 0.000388462     |
| 998  | 26039571    | 10.1038/srep10889              | GPA                     | 2015        | 0               | 0.000388462     |
| 999  | 25889572    | 10.1186/s13104-015-1118-8      | mBISON                  | 2015        | 0               | 0.000388462     |
| 1000 | 24895499    | 10.1155/2014/746979            | miCancerna              | 2014        | 0               | 0.000388462     |
| 1001 | 24862384    | 10.1016/j.gpb.2014.03.003      | C2Analyzer              | 2014        | 0               | 0.000388462     |
| 1002 | 24408217    | 10.1093/database/bat084        | DevMouse                | 2014        | 0               | 0.000388462     |
| 1003 | 24156242    | 10.1186/1756-0500-6-430        | VAN                     | 2013        | 0               | 0.000388462     |
| 1004 | 23924514    | 10.1074/mcp.O112.019851        | ProteoMirExpress        | 2013        | 0               | 0.000388462     |
| 1005 | 23625170    | 10.1007/s10059-013-0019-8      | MiRAuto                 | 2013        | 0               | 0.000388462     |
| 1006 | 23052038    | 10.1093/bioinformatics/bts574  | MinDist                 | 2012        | 0               | 0.000388462     |
| 1007 | 22829735    | 10.6026/97320630008581         | RAmiRNA                 | 2012        | 0               | 0.000388462     |
| 1008 | 22303335    | 10.3389/fgene.2011.00039       | MIRNA-DISTILLER         | 2011        | 0               | 0.000388462     |
| 1009 | 21609420    | 10.1186/1471-2164-12-262       | GiSAO.db                | 2011        | 0               | 0.000388462     |
| 1010 | 21423893    | not applicable                 | IntmiR                  | 2011        | 0               | 0.000388462     |
| 1011 | 21364831    | not applicable                 | Mi-DISCOVERER           | 2010        | 0               | 0.000388462     |
| 1012 | 19707298    | not applicable                 | BatchGenAna             | 2009        | 0               | 0.000388462     |
| 1013 | 19674478    | 10.1186/1471-2105-10-249       | EvoRSR                  | 2009        | 0               | 0.000388462     |
| 1014 | 17518996    | 10.1186/1471-2105-8-164        | SpecificDB              | 2007        | 0               | 0.000388462     |
| 1015 | 16845036    | 10.1093/nar/gkl223             | CrossLink               | 2006        | 0               | 0.000388462     |
| 1016 | 17351617    | 10.1038/nbt1291                | MPSS                    | 2007        | 87              | 0               |
| 1017 | 22743224    | 10.1093/bioinformatics/bts366  | GO-Elite                | 2012        | 69              | 0               |
| 1018 | 23269662    | 10.1101/gr.143586.112          | ATARiS                  | 2013        | 52              | 0               |
| 1019 | 23203866    | 10.1093/nar/gks1141            | FlyAtlas?               | 2013        | 49              | 0               |
| 1020 | 22513995    | 10.1093/bioinformatics/bts188  | NanoStringNorm          | 2012        | 48              | 0               |
| 1021 | 18440976    | 10.1093/nar/gkn198             | IDT SciTools            | 2008        | 39              | 0               |
| 1022 | 16204124    | 10.1093/bioinformatics/bti1108 | ARTS                    | 2005        | 39              | 0               |
| 1023 | 25398901    | 10.1093/nar/gku1151            | MethHC                  | 2015        | 31              | 0               |
| 1024 | 17675842    | 10.1159/000103162              | GEISHA                  | 2007        | 30              | 0               |
| 1025 | 20216476    | 10.1097/FPC.0b013e328337b8d6   | PACdb                   | 2010        | 29              | 0               |
| 1026 | 18769488    | 10.1155/2008/496957            | maizeGDB                | 2008        | 29              | 0               |
| 1027 | 23832570    | 10.1007/s12035-013-8489-4      | PD map                  | 2014        | 26              | 0               |
| 1028 | 18086700    | 10.1093/nar/gkm979             | SNPeffect and PupaSuite | 2008        | 26              | 0               |
| 1029 | 16845038    | 10.1093/nar/gkl312             | ARTS                    | 2006        | 22              | 0               |
| 1030 | 19387483    | 10.1038/gt.2009.37             | QuickMap                | 2009        | 20              | 0               |
| 1031 | 17916572    | 10.1093/nar/gkm787             | Greglist                | 2008        | 20              | 0               |
| 1032 | 25378303    | 10.1093/nar/gku1054            | iBeetle-Base            | 2015        | 18              | 0               |

|      | <b>PMID</b> | <b>DOI</b>                     | <b>Name</b>    | <b>Year</b> | <b>Citation</b> | <b>Pagerank</b> |
|------|-------------|--------------------------------|----------------|-------------|-----------------|-----------------|
| 1033 | 24895436    | 10.1093/nar/gku412             | DiseaseConnect | 2014        | 18              | 0               |
| 1034 | 24480175    | 10.1016/j.compbio.2013.12.007  | miRClassify    | 2014        | 18              | 0               |
| 1035 | 24472427    | 10.1186/1471-2105-15-29        | miRprimer      | 2014        | 18              | 0               |
| 1036 | 24799323    | 10.1002/gepi.21808             | OmicKriging    | 2014        | 15              | 0               |
| 1037 | 25361971    | 10.1093/nar/gku1042            | GeneFriends    | 2015        | 14              | 0               |
| 1038 | 19880369    | 10.1093/bioinformatics/btp601  | MicroRazerS    | 2010        | 14              | 0               |
| 1039 | 18984625    | 10.1093/nar/gkn756             | SNPLogic       | 2009        | 14              | 0               |
| 1040 | 18501192    | 10.1016/j.bbrc.2008.05.046     | sRNATarget     | 2008        | 12              | 0               |
| 1041 | 25704310    | 10.1016/j.semcd.2015.02.005    | EVpedia        | 2015        | 11              | 0               |
| 1042 | 22940442    | 10.1016/j.ygeno.2012.08.006    | miRNA_Targets  | 2012        | 11              | 0               |
| 1043 | 22563068    | 10.1093/bioinformatics/bts257  | birta          | 2012        | 11              | 0               |
| 1044 | 21418570    | 10.1186/1471-2105-12-79        | MicroSyn       | 2011        | 11              | 0               |
| 1045 | 27247353    | 10.1093/jnci/djw122            | SCLC           | 2016        | 10              | 0               |
| 1046 | 26639025    | 10.1038/srep17787              | Radiogenomics  | 2015        | 10              | 0               |
| 1047 | 20479783    | 10.1038/cr.2010.67             | HCCNet         | 2010        | 10              | 0               |
| 1048 | 24813450    | 10.1093/nar/gku367             | Wormnet        | 2014        | 9               | 0               |
| 1049 | 22546559    | 10.1016/j.ygeno.2012.04.002    | mirtronPred    | 2012        | 9               | 0               |
| 1050 | 16204111    | 10.1093/bioinformatics/bti1139 | PHMMTSs        | 2005        | 9               | 0               |
| 1051 | 27058395    | 10.1371/journal.pgen.1005947   | GenoSkyline    | 2016        | 8               | 0               |
| 1052 | 26148744    | 10.1093/bioinformatics/btv406  | DINGO          | 2015        | 7               | 0               |
| 1053 | 25505085    | 10.1093/bioinformatics/btu811  | miR_Path       | 2015        | 7               | 0               |
| 1054 | 22760305    | 10.1093/bioinformatics/bts421  | AraPath        | 2012        | 7               | 0               |
| 1055 | 20183876    | not applicable                 | JBCB           | 2010        | 7               | 0               |
| 1056 | 20107865    | 10.1007/s10142-009-0156-5      | MTDB           | 2010        | 7               | 0               |
| 1057 | 19933823    | 10.1093/bioinformatics/btp654  | MIRAGAA        | 2010        | 7               | 0               |
| 1058 | 25577387    | 10.1007/978-1-4939-2291-8_19   | ViennaRNA      | 2015        | 6               | 0               |
| 1059 | 24443376    | 10.1093/bioinformatics/btu025  | netClass       | 2014        | 6               | 0               |
| 1060 | 24209909    | 10.1016/j.compbio.2013.08.010  | At_miRNA       | 2013        | 6               | 0               |
| 1061 | 22144203    | 10.1007/978-1-61779-427-8_16   | deepBase       | 2012        | 6               | 0               |
| 1062 | 12584120    | not applicable                 | ed_scan        | 2003        | 6               | 0               |
| 1063 | 26721496    | 10.1007/978-1-4939-3378-5_19   | NONCODE        | 2016        | 5               | 0               |
| 1064 | 26149235    | 10.1002/pmic.201500260         | FunRich        | 2015        | 5               | 0               |
| 1065 | 24344172    | 10.1093/dnares/dst053          | Carnation DB   | 2014        | 5               | 0               |
| 1066 | 23314125    | 10.1093/bioinformatics/btt008  | CePa           | 2013        | 5               | 0               |
| 1067 | 23162053    | 10.1093/bioinformatics/bts675  | PASS           | 2013        | 5               | 0               |
| 1068 | 22041293    | 10.1016/j.compbio.2011.10.001  | microDoR       | 2012        | 5               | 0               |
| 1069 | 16239305    | 10.1093/bioinformatics/bti728  | OligoFaktory   | 2006        | 5               | 0               |
| 1070 | 28055894    | 10.1109/TCBB.2015.2510002      | MiRTDL         | 2016        | 4               | 0               |
| 1071 | 27741327    | 10.18388/abp.2016_1329         | RNAComposer    | 2016        | 4               | 0               |
| 1072 | 26454275    | 10.1093/bioinformatics/btv583  | miTRATA        | 2016        | 4               | 0               |
| 1073 | 26112290    | 10.1093/bioinformatics/btv379  | biRte          | 2015        | 4               | 0               |
| 1074 | 25884877    | 10.1371/journal.pcbi.1004132   | Loregic        | 2015        | 4               | 0               |
| 1075 | 24400739    | 10.1111/1755-0998.12223        | GAmiRdb        | 2014        | 4               | 0               |
| 1076 | 22987133    | 10.1109/TNB.2012.2212030       | BioVLAB-MMIA   | 2012        | 4               | 0               |
| 1077 | 22609373    | 10.1016/j.mcp.2012.05.002      | miRSeqNovel    | 2012        | 4               | 0               |
| 1078 | 21388547    | 10.1186/1471-2105-12-72        | dChip          | 2011        | 4               | 0               |
| 1079 | 20460468    | 10.1093/nar/gkq362             | DynaMod        | 2010        | 4               | 0               |

|      | <b>PMID</b> | <b>DOI</b>                        | <b>Name</b>                             | <b>Year</b> | <b>Citation</b> | <b>Pagerank</b> |
|------|-------------|-----------------------------------|-----------------------------------------|-------------|-----------------|-----------------|
| 1080 | 19761576    | 10.1186/1471-2105-10-S9-S6        | PGnet                                   | 2009        | 4               | 0               |
| 1081 | 15215363    | 10.1093/nar/gkh360                | TROD                                    | 2004        | 4               | 0               |
| 1082 | 28315753    | 10.1016/j.molp.2017.03.003        | PlantcircBase                           | 2017        | 3               | 0               |
| 1083 | 27175225    | 10.1186/s13326-016-0064-2         | OmniSearch                              | 2016        | 3               | 0               |
| 1084 | 26887375    | 10.1007/s10142-016-0480-5         | PlanTE-MIR DB                           | 2016        | 3               | 0               |
| 1085 | 26748106    | 10.1093/bioinformatics/btw008     | EpimiRBase                              | 2016        | 3               | 0               |
| 1086 | 26499212    | 10.1016/j.biosystems.2015.10.003  | miRNAfe                                 | 2015        | 3               | 0               |
| 1087 | 25840043    | 10.1093/bioinformatics/btv187     | DREAM                                   | 2015        | 3               | 0               |
| 1088 | 25332396    | 10.1093/nar/gku984                | BCCTBbp                                 | 2015        | 3               | 0               |
| 1089 | 24216114    | not applicable                    | mirnaDetect                             | 2013        | 3               | 0               |
| 1090 | 24098326    | 10.1371/journal.pone.0073168      | activeMiRNA                             | 2013        | 3               | 0               |
| 1091 | 23257199    | 10.1093/bioinformatics/bts709     | InCroMAP                                | 2013        | 3               | 0               |
| 1092 | 22829626    | 10.1093/bioinformatics/bts466     | ViennaRNA                               | 2012        | 3               | 0               |
| 1093 | 22433074    | 10.1089/omi.2011.0115             | Semirna                                 | 2012        | 3               | 0               |
| 1094 | 22362105    | 10.1039/c2mb05469h                | miRUPnet                                | 2012        | 3               | 0               |
| 1095 | 20387146    | 10.1007/978-1-60761-657-3_8       | OligoWalk                               | 2010        | 3               | 0               |
| 1096 | 19802596    | 10.1007/978-1-60327-005-2_12      | Comparative Sequencing of Plant Small F | 2010        | 3               | 0               |
| 1097 | 28108447    | 10.1093/bioinformatics/btx019     | miRmine                                 | 2017        | 2               | 0               |
| 1098 | 27924044    | 10.1093/nar/gkw988                | PlaMoM                                  | 2017        | 2               | 0               |
| 1099 | 27744485    | 10.1007/s10549-016-4013-7         | miRpower                                | 2016        | 2               | 0               |
| 1100 | 27428722    | 10.1089/cmb.2016.0059             | MirCompare                              | 2016        | 2               | 0               |
| 1101 | 27153728    | 10.1093/bioinformatics/btw070     | IsomiR Bank                             | 2016        | 2               | 0               |
| 1102 | 27037912    | 10.1111/cpr.12247                 | GAMDB                                   | 2016        | 2               | 0               |
| 1103 | 26817607    | 10.1186/s12864-015-2301-y         | RDDpred                                 | 2016        | 2               | 0               |
| 1104 | 26568631    | 10.1093/bioinformatics/btv673     | CHRONOS                                 | 2016        | 2               | 0               |
| 1105 | 26510603    | 10.7868/S0026898415050195         | rnaanalys                               | 2015        | 2               | 0               |
| 1106 | 25872185    | 10.1016/j.ymeth.2015.04.006       | miXGENE                                 | 2015        | 2               | 0               |
| 1107 | 25168057    | 10.1093/database/bau085           | LiverCancerMarkerRIF                    | 2014        | 2               | 0               |
| 1108 | 24892985    | 10.1016/j.ab.2014.05.020          | NqA                                     | 2014        | 2               | 0               |
| 1109 | 24766777    | 10.1186/1471-2105-15-116          | ShrinkBayes                             | 2014        | 2               | 0               |
| 1110 | 24303318    | not applicable                    | G-DOC                                   | 2013        | 2               | 0               |
| 1111 | 23499870    | 10.1016/j.compbiolchem.2013.02.00 | Exp. Verified microRNA-Target           | 2013        | 2               | 0               |
| 1112 | 20702398    | 10.1093/bioinformatics/btq457     | NoiseMaker                              | 2010        | 2               | 0               |
| 1113 | 20041294    | 10.1007/s11030-009-9216-y         | miRTP                                   | 2010        | 2               | 0               |
| 1114 | 18533047    | 10.1186/gb-2008-9-6-226           | Wormnet                                 | 2008        | 2               | 0               |
| 1115 | 18389634    | not applicable                    | siRNAs with high specificity to the t   | 2008        | 2               | 0               |
| 1116 | 17575198    | 10.1093/ps/86.7.1472              | GEISHA                                  | 2007        | 2               | 0               |
| 1117 | 16873477    | 10.1093/bioinformatics/btl265     | NRSE                                    | 2006        | 2               | 0               |
| 1118 | 16500934    | 10.1093/bioinformatics/btl062     | START                                   | 2006        | 2               | 0               |
| 1119 | 16448692    | 10.1016/j.ijbiomac.2005.12.024    | DSTHO                                   | 2006        | 2               | 0               |
| 1120 | 15679092    | not applicable                    | ESPSearch                               | 2005        | 2               | 0               |
| 1121 | 12519960    | not applicable                    | PACRAT                                  | 2003        | 2               | 0               |
| 1122 | 28830355    | 10.1186/s12864-017-4009-7         | The Porcine Translational Research Data | 2017        | 1               | 0               |
| 1123 | 28575165    | 10.1093/dnares/dsx022             | pigcirNet                               | 2017        | 1               | 0               |
| 1124 | 28407097    | 10.1093/bioinformatics/btx210     | The UEA sRNA workbench                  | 2017        | 1               | 0               |
| 1125 | 28111366    | 10.1093/pep/pew220                | Orchidstra                              | 2017        | 1               | 0               |
| 1126 | 28086747    | 10.1186/s12859-016-1421-y         | mirnanalyze                             | 2017        | 1               | 0               |



|      | <b>PMID</b> | <b>DOI</b>                      | <b>Name</b>                            | <b>Year</b> | <b>Citation</b> | <b>Pagerank</b> |
|------|-------------|---------------------------------|----------------------------------------|-------------|-----------------|-----------------|
| 1127 | 28057684    | 10.1093/bioinformatics/btw734   | iSmaRT                                 | 2017        | 1               | 0               |
| 1128 | 27889431    | 10.1016/j.combiomed.2016.11.008 | miRNA-ensemble                         | 2017        | 1               | 0               |
| 1129 | 27797767    | 10.1093/bioinformatics/btw660   | miRNAmeConverter                       | 2017        | 1               | 0               |
| 1130 | 26851225    | 10.1093/bib/bbw007              | GED                                    | 2017        | 1               | 0               |
| 1131 | 28025337    | 10.1093/database/baw144         | SlideBase                              | 2016        | 1               | 0               |
| 1132 | 27494513    | 10.1016/j.cbd.2016.07.002       | MicroTrout                             | 2016        | 1               | 0               |
| 1133 | 27484480    | 10.1093/nar/gkw679              | Pseudo-3D Clustering                   | 2016        | 1               | 0               |
| 1134 | 26994965    | 10.1016/j.jviromet.2016.03.005  | MISIS                                  | 2016        | 1               | 0               |
| 1135 | 26860128    | 10.1186/s12859-016-0926-8       | SIM                                    | 2016        | 1               | 0               |
| 1136 | 26784022    | 10.18388/abp.2015_989           | AmiRNA Designer                        | 2016        | 1               | 0               |
| 1137 | 26704598    | 10.1093/bioinformatics/btv747   | OfftargetFinder                        | 2016        | 1               | 0               |
| 1138 | 25861770    | 10.1007/7651_2015_237           | MetaMirClust                           | 2016        | 1               | 0               |
| 1139 | 25968440    | 10.1515/sagmb-2014-0093         | TopKLists                              | 2015        | 1               | 0               |
| 1140 | 25788622    | 10.1093/bioinformatics/btv159   | CoMoFinder                             | 2015        | 1               | 0               |
| 1141 | 25322835    | 10.1093/bioinformatics/btu676   | miRseqViewer                           | 2015        | 1               | 0               |
| 1142 | 25308527    | 10.1039/c4mb00339j              | LncEnvironmentDB                       | 2014        | 1               | 0               |
| 1143 | 25187691    | 10.6026/97320630010472          | TmiRUSite and TmiROSite scripts        | 2014        | 1               | 0               |
| 1144 | 25036161    | 10.4238/2014.June.9.3           | New support vector machine-based methc | 2014        | 1               | 0               |
| 1145 | 24794934    | 10.1093/bioinformatics/btu306   | Mirin                                  | 2014        | 1               | 0               |
| 1146 | 24632500    | 10.1093/bioinformatics/btu147   | comTAR                                 | 2014        | 1               | 0               |
| 1147 | 24463184    | 10.1093/bioinformatics/btu044   | msgl                                   | 2014        | 1               | 0               |
| 1148 | 24385242    | 10.1007/s00726-013-1646-2       | EDMRP                                  | 2014        | 1               | 0               |
| 1149 | 24292936    | 10.1093/bioinformatics/btt695   | MSbind                                 | 2014        | 1               | 0               |
| 1150 | 24091407    | 10.1109/TCBB.2013.75            | SARS                                   | 2013        | 1               | 0               |
| 1151 | 23047564    | 10.1093/bioinformatics/bts583   | InCroMAP                               | 2012        | 1               | 0               |
| 1152 | 21798209    | 10.1016/j.margen.2010.09.003    | AmphiEST                               | 2010        | 1               | 0               |
| 1153 | 20827541    | 10.1007/978-1-60761-811-9_19    | miRDB                                  | 2010        | 1               | 0               |
| 1154 | 20525252    | 10.1186/1471-2105-11-300        | UFFizi                                 | 2010        | 1               | 0               |
| 1155 | 18369991    | 10.1007/978-1-59745-033-1_20    | miRBase                                | 2008        | 1               | 0               |
| 1156 | 18207283    | 10.1016/j.cmpb.2007.12.001      | rnaworkbench                           | 2008        | 1               | 0               |
| 1157 | 18287704    | not applicable                  | MPSS                                   | 2007        | 1               | 0               |
| 1158 | 29157446    | 10.1016/j.cmpb.2017.10.013      | Director                               | 2018        | 0               | 0               |
| 1159 | 29297411    | 10.1186/s13326-017-0140-2       | DisSetSim                              | 2017        | 0               | 0               |
| 1160 | 29280990    | 10.1093/bioinformatics/btx824   | DPMIND                                 | 2017        | 0               | 0               |
| 1161 | 29272359    | 10.1093/bib/bbx165              | BioSeq-Analysis                        | 2017        | 0               | 0               |
| 1162 | 29236948    | 10.1093/bioinformatics/btx797   | TarHunter                              | 2017        | 0               | 0               |
| 1163 | 29194489    | 10.1093/nar/gkx1144             | mirDIP                                 | 2017        | 0               | 0               |
| 1164 | 29156006    | 10.1093/nar/gkx1141             | DIANA-TarBase                          | 2017        | 0               | 0               |
| 1165 | 29155959    | 10.1093/nar/gkx1115             | SeRPeNT                                | 2017        | 0               | 0               |
| 1166 | 29143332    | 10.1002/ijc.31158               | ChemoCommunity                         | 2017        | 0               | 0               |
| 1167 | 29140524    | 10.1093/nar/gkx1107             | NONCODE                                | 2017        | 0               | 0               |
| 1168 | 29136092    | 10.1093/bioinformatics/btx725   | microRPM                               | 2017        | 0               | 0               |
| 1169 | 29126216    | 10.1093/nar/gkx1040             | PAGER                                  | 2017        | 0               | 0               |
| 1170 | 29126174    | 10.1093/nar/gkx1067             | miRTarBase                             | 2017        | 0               | 0               |
| 1171 | 29106642    | 10.1093/nar/gkx1035             | MSDD                                   | 2017        | 0               | 0               |
| 1172 | 29106639    | 10.1093/nar/gkx1025             | MNDR                                   | 2017        | 0               | 0               |
| 1173 | 29077939    | 10.1093/nar/gkx1004             | IncRNASNP                              | 2017        | 0               | 0               |

|      | <b>PMID</b> | <b>DOI</b>                     | <b>Name</b>      | <b>Year</b> | <b>Citation</b> | <b>Pagerank</b> |
|------|-------------|--------------------------------|------------------|-------------|-----------------|-----------------|
| 1174 | 29077896    | 10.1093/nar/gkx996             | mirTrans         | 2017        | 0               | 0               |
| 1175 | 29069479    | 10.1093/nar/gkx976             | FlyAtlas         | 2017        | 0               | 0               |
| 1176 | 29069317    | 10.1093/bioinformatics/btx672  | EPLMI            | 2017        | 0               | 0               |
| 1177 | 29059382    | 10.1093/nar/gkx972             | dreamBase        | 2017        | 0               | 0               |
| 1178 | 29040692    | 10.1093/nar/gkx934             | RMBase           | 2017        | 0               | 0               |
| 1179 | 29040625    | 10.1093/nar/gkx864             | RISE             | 2017        | 0               | 0               |
| 1180 | 29036693    | 10.1093/nar/gkx875             | ICG              | 2017        | 0               | 0               |
| 1181 | 29036683    | 10.1093/nar/gkx877             | CR2Cancer        | 2017        | 0               | 0               |
| 1182 | 29036653    | 10.1093/nar/gkx851             | miRCarta         | 2017        | 0               | 0               |
| 1183 | 29036590    | 10.1093/nar/gkx850             | TissGDB          | 2017        | 0               | 0               |
| 1184 | 29036351    | 10.1093/nar/gkx854             | miRandola        | 2017        | 0               | 0               |
| 1185 | 29036329    | 10.1093/nar/gkx895             | m6AVar           | 2017        | 0               | 0               |
| 1186 | 29028927    | 10.1093/bioinformatics/btx622  | MMCOP            | 2017        | 0               | 0               |
| 1187 | 29028911    | 10.1093/bioinformatics/btx612  | miRNAAss         | 2017        | 0               | 0               |
| 1188 | 29028907    | 10.1093/bioinformatics/btx627  | OncomiR          | 2017        | 0               | 0               |
| 1189 | 29028895    | 10.1093/bioinformatics/btx606  | CCmiR            | 2017        | 0               | 0               |
| 1190 | 28992259    | 10.1093/jhered/esx075          | Wgssat           | 2017        | 0               | 0               |
| 1191 | 28985416    | 10.1093/nar/gkx677             | EVLncRNAs        | 2017        | 0               | 0               |
| 1192 | 28977416    | 10.1093/nar/gkx701             | IMOTA            | 2017        | 0               | 0               |
| 1193 | 28968841    | 10.1093/bib/bbx089             | AtCircDB         | 2017        | 0               | 0               |
| 1194 | 28968779    | 10.1093/bioinformatics/btx545  | GRNMF            | 2017        | 0               | 0               |
| 1195 | 28968753    | 10.1093/bioinformatics/btx546  | DMPred           | 2017        | 0               | 0               |
| 1196 | 28968662    | 10.1093/bib/bbx092             | RNA Editing Plus | 2017        | 0               | 0               |
| 1197 | 28961690    | 10.1093/bioinformatics/btx523  | ncDR             | 2017        | 0               | 0               |
| 1198 | 28934507    | 10.1093/nar/gkx706             | bloodmiRs        | 2017        | 0               | 0               |
| 1199 | 28920619    | 10.1039/c7mb00485k             | DMTHNDM          | 2017        | 0               | 0               |
| 1200 | 28881990    | 10.1093/bioinformatics/btx256  | iJRF             | 2017        | 0               | 0               |
| 1201 | 28862214    | 10.4103/0973-1482.168978       | RespCanDB        | 2017        | 0               | 0               |
| 1202 | 28844466    | 10.1016/j.compbio.2017.08.013  | FMIGS            | 2017        | 0               | 0               |
| 1203 | 28832679    | 10.1371/journal.pone.0182507   | MLSeq            | 2017        | 0               | 0               |
| 1204 | 28727297    | 10.1002/minf.201600141         | ParSel           | 2017        | 0               | 0               |
| 1205 | 28692985    | 10.1109/TCBB.2017.2723394      | mTD              | 2017        | 0               | 0               |
| 1206 | 28686301    | 10.1002/1873-3468.12746        | miRPursuit       | 2017        | 0               | 0               |
| 1207 | 28600227    | 10.1016/j.ymeth.2017.06.004    | miRTarVis+       | 2017        | 0               | 0               |
| 1208 | 28575488    | 10.1093/nar/gkx492             | deepboost        | 2017        | 0               | 0               |
| 1209 | 28552033    | 10.1142/S0219720017500135      | MicroTarget      | 2017        | 0               | 0               |
| 1210 | 28529080    | 10.1016/j.jgg.2017.01.004      | lncRInter        | 2017        | 0               | 0               |
| 1211 | 28529075    | 10.1016/j.jgg.2017.04.003      | mTD              | 2017        | 0               | 0               |
| 1212 | 28511181    | 10.1159/000475805              | l-CMDb           | 2017        | 0               | 0               |
| 1213 | 28460090    | 10.1093/nar/gkx318             | mirSTP           | 2017        | 0               | 0               |
| 1214 | 28439836    | 10.1007/978-1-4939-6866-4_15   | miRGate          | 2017        | 0               | 0               |
| 1215 | 28334276    | 10.1093/bioinformatics/btx087  | MotifMap-RNA     | 2017        | 0               | 0               |
| 1216 | 28215525    | 10.1016/j.cels.2017.01.011     | PheLiM           | 2017        | 0               | 0               |
| 1217 | 28177064    | 10.1093/bioinformatics/btx066  | CPSS             | 2017        | 0               | 0               |
| 1218 | 28124611    | 10.2174/2211536606666170117112 | ImmunemiR        | 2017        | 0               | 0               |
| 1219 | 28073746    | 10.1093/bib/bbw140             | miRDis           | 2017        | 0               | 0               |
| 1220 | 28049134    | 10.1093/bib/bbw109             | miRandb          | 2017        | 0               | 0               |

|      | <b>PMID</b> | <b>DOI</b>                       | <b>Name</b>                               | <b>Year</b> | <b>Citation</b> | <b>Pagerank</b> |
|------|-------------|----------------------------------|-------------------------------------------|-------------|-----------------|-----------------|
| 1221 | 27871823    | 10.1016/j.jbi.2016.11.003        | ImmunemiR                                 | 2017        | 0               | 0               |
| 1222 | 27295687    | 10.1109/TCBB.2016.2576459        | deepSOM                                   | 2017        | 0               | 0               |
| 1223 | 28187421    | 10.2390/biecoll-jib-2016-307     | miRquant                                  | 2016        | 0               | 0               |
| 1224 | 27983673    | 10.3390/microarrays5040029       | miRNA-Analyzer                            | 2016        | 0               | 0               |
| 1225 | 27831888    | 10.1109/TCBB.2016.2623605        | FREM                                      | 2016        | 0               | 0               |
| 1226 | 27587697    | 10.1093/bioinformatics/btw452    | TF--miRNA                                 | 2016        | 0               | 0               |
| 1227 | 27587663    | 10.1093/bioinformatics/btw435    | MULSEA                                    | 2016        | 0               | 0               |
| 1228 | 27472470    | 10.1039/c6mb00295a               | plantMirP                                 | 2016        | 0               | 0               |
| 1229 | 27295638    | 10.1109/TCBB.2015.2462370        | BiCliques Merging                         | 2016        | 0               | 0               |
| 1230 | 27153626    | 10.1093/bioinformatics/btw189    | Tools4miRs                                | 2016        | 0               | 0               |
| 1231 | 27097230    | 10.1089/zeb.2016.1277            | SignaFish                                 | 2016        | 0               | 0               |
| 1232 | 27050998    | 10.4238/gmr.15016861             | miRQuest                                  | 2016        | 0               | 0               |
| 1233 | 26940364    | 10.1016/j.bbagen.2016.02.017     | dbPHCC                                    | 2016        | 0               | 0               |
| 1234 | 26677964    | 10.1093/bioinformatics/btv729    | pirnaPre                                  | 2016        | 0               | 0               |
| 1235 | 26530722    | 10.1093/bioinformatics/btv632    | SeqBuster                                 | 2016        | 0               | 0               |
| 1236 | 26264058    | 10.1007/s11517-015-1360-1        | FMIMS                                     | 2016        | 0               | 0               |
| 1237 | 26841410    | 10.1109/TCBB.2015.2511767        | MDTE DB                                   | 2015        | 0               | 0               |
| 1238 | 26589589    | 10.1186/s12920-015-0154-5        | iBFE                                      | 2015        | 0               | 0               |
| 1239 | 26451829    | 10.1109/TCBB.2014.2388227        | YamiPred                                  | 2015        | 0               | 0               |
| 1240 | 25677919    | 10.1016/j.compbiochem.2015.01.00 | MicRoON                                   | 2015        | 0               | 0               |
| 1241 | 25548139    | 10.1177/1087057114564348         | iScreen                                   | 2015        | 0               | 0               |
| 1242 | 25183485    | 10.1093/bioinformatics/btu589    | ORCA                                      | 2015        | 0               | 0               |
| 1243 | 25258491    | 10.6026/97320630010539           | miRAFinder and GeneAFinder script         | 2014        | 0               | 0               |
| 1244 | 24835488    | 10.1111/age.12170                | BosFinder                                 | 2014        | 0               | 0               |
| 1245 | 24377695    | 10.1016/j.compbio.2013.11.001    | Functional interpretation of microRNA-nr  | 2014        | 0               | 0               |
| 1246 | 24091406    | 10.1109/TCBB.2013.74             | application in consensus ranking of micrc | 2013        | 0               | 0               |
| 1247 | 23640718    | 10.1093/bioinformatics/btt246    | miMsg                                     | 2013        | 0               | 0               |
| 1248 | 21181349    | 10.1007/s11427-010-4101-6        | RiceChip                                  | 2010        | 0               | 0               |
| 1249 | 20869951    | 10.1016/j.bbrc.2010.09.077       | webFOG                                    | 2010        | 0               | 0               |
| 1250 | 20217545    | 10.1007/978-1-60761-588-0_5      | AsiDesigner                               | 2010        | 0               | 0               |
| 1251 | 19808883    | 10.1093/bioinformatics/btp574    | ncRNAppi                                  | 2009        | 0               | 0               |
| 1252 | 19180879    | not applicable                   | MiRE                                      | 2008        | 0               | 0               |
| 1253 | 18501460    | 10.1016/j.jbiotec.2008.04.004    | EGs                                       | 2008        | 0               | 0               |
| 1254 | 16722778    | not applicable                   | OligoMatcher                              | 2006        | 0               | 0               |

**The order priority is Pagerank, Citation, and then Year.**
