# Supplementary material for: Trends in the development of miRNA bioinformatics tools
Source: PubMed Central journal article supplement — Brief Bioinform. 2019 Jun 17;20(5):1836–52. doi: 10.1093/bib/bby054 (PMC7414524; doi:10.1093/bib/bby054), 2019-06-17
Supplement: bby054_supp_st_3.pdf [file bby054_supp_st_3.pdf]

**Supplementary Table 3. Tags statistic of miRNA tools based on miRToolsGallery.**

| Tag Categories | Tags        | 2003                                      | 2004 | 2005 | 2006 | 2007 | 2008 | 2009 | 2010 | 2011 | 2012 | 2013 | 2014 | 2015 | 2016 | 2017 |    |
|----------------|-------------|-------------------------------------------|------|------|------|------|------|------|------|------|------|------|------|------|------|------|----|
| 1              | Common Tags | 3'/5' Modifications                       | 0    | 0    | 0    | 0    | 0    | 0    | 0    | 0    | 0    | 0    | 1    | 2    | 1    | 0    |    |
| 2              | Common Tags | 3'/5' UTR                                 | 1    | 2    | 4    | 3    | 4    | 3    | 1    | 4    | 4    | 7    | 1    | 5    | 4    | 0    | 2  |
| 3              | Common Tags | Adipogenesis                              | 0    | 0    | 0    | 0    | 0    | 0    | 0    | 0    | 0    | 0    | 0    | 0    | 2    | 0    |    |
| 4              | Common Tags | Alignment                                 | 0    | 0    | 1    | 0    | 0    | 4    | 6    | 5    | 4    | 2    | 2    | 4    | 2    | 3    | 0  |
| 5              | Common Tags | Alternatively Spliced Transcripts         | 0    | 0    | 0    | 0    | 1    | 0    | 0    | 0    | 1    | 0    | 1    | 0    | 0    | 0    | 0  |
| 6              | Common Tags | Alzheimer's Disease                       | 0    | 0    | 0    | 0    | 0    | 0    | 0    | 0    | 0    | 0    | 2    | 1    | 1    | 3    |    |
| 7              | Common Tags | Antisense                                 | 0    | 0    | 0    | 0    | 0    | 0    | 0    | 0    | 0    | 0    | 0    | 0    | 0    | 1    |    |
| 8              | Common Tags | Argonaute (AGO)                           | 0    | 0    | 0    | 0    | 0    | 0    | 0    | 3    | 1    | 2    | 2    | 1    | 3    | 2    |    |
| 9              | Common Tags | Arm Switching                             | 0    | 0    | 0    | 0    | 0    | 0    | 0    | 0    | 0    | 1    | 1    | 2    | 1    | 1    |    |
| 10             | Common Tags | Artificial miRNA                          | 0    | 0    | 0    | 1    | 0    | 1    | 0    | 0    | 0    | 0    | 0    | 0    | 2    | 0    |    |
| 11             | Common Tags | Association                               | 0    | 0    | 0    | 0    | 0    | 1    | 7    | 6    | 6    | 7    | 10   | 19   | 9    | 10   | 21 |
| 12             | Common Tags | Autophagy                                 | 0    | 0    | 0    | 0    | 0    | 0    | 0    | 0    | 0    | 0    | 0    | 1    | 1    | 0    |    |
| 13             | Common Tags | Biomarker                                 | 0    | 0    | 0    | 0    | 0    | 0    | 0    | 0    | 1    | 3    | 4    | 1    | 0    | 4    |    |
| 14             | Common Tags | Blood                                     | 0    | 0    | 0    | 0    | 0    | 0    | 0    | 0    | 1    | 0    | 2    | 0    | 2    | 1    |    |
| 15             | Common Tags | Cancer/Tumor                              | 0    | 0    | 0    | 0    | 0    | 1    | 2    | 9    | 7    | 9    | 14   | 16   | 11   | 12   | 13 |
| 16             | Common Tags | ceRNA                                     | 0    | 0    | 0    | 0    | 0    | 0    | 0    | 1    | 1    | 3    | 3    | 3    | 3    | 2    |    |
| 17             | Common Tags | Chemical                                  | 0    | 0    | 0    | 0    | 0    | 0    | 0    | 0    | 1    | 0    | 1    | 1    | 1    | 1    |    |
| 18             | Common Tags | ChIP-Seq                                  | 0    | 0    | 0    | 0    | 1    | 0    | 0    | 1    | 0    | 0    | 1    | 0    | 0    | 1    | 1  |
| 19             | Common Tags | CircRNA                                   | 0    | 0    | 0    | 0    | 0    | 0    | 0    | 1    | 0    | 3    | 2    | 2    | 5    | 3    |    |
| 20             | Common Tags | Cis-regulatory Element                    | 0    | 0    | 0    | 1    | 1    | 1    | 0    | 0    | 0    | 1    | 0    | 0    | 2    | 0    | 0  |
| 21             | Common Tags | CLASH                                     | 0    | 0    | 0    | 0    | 1    | 0    | 0    | 0    | 0    | 1    | 0    | 1    | 0    | 1    | 0  |
| 22             | Common Tags | Classification                            | 0    | 0    | 1    | 0    | 1    | 0    | 1    | 0    | 2    | 2    | 4    | 4    | 2    | 1    | 3  |
| 23             | Common Tags | Cleavage Sites                            | 0    | 0    | 0    | 0    | 0    | 0    | 0    | 0    | 0    | 1    | 0    | 0    | 1    | 0    |    |
| 24             | Common Tags | CLIP-Seq                                  | 0    | 1    | 0    | 1    | 0    | 1    | 0    | 0    | 3    | 0    | 4    | 5    | 1    | 5    | 7  |
| 25             | Common Tags | Coding Sequence (CDS)                     | 0    | 1    | 0    | 0    | 0    | 1    | 0    | 0    | 1    | 3    | 1    | 2    | 2    | 0    | 0  |
| 26             | Common Tags | Co-expressed                              | 0    | 0    | 2    | 1    | 0    | 1    | 1    | 0    | 2    | 1    | 4    | 0    | 2    | 0    | 2  |
| 27             | Common Tags | Correlation Analysis                      | 0    | 0    | 0    | 0    | 0    | 0    | 1    | 0    | 0    | 0    | 1    | 1    | 1    | 1    |    |
| 28             | Common Tags | Differential Expression                   | 0    | 0    | 0    | 0    | 1    | 1    | 3    | 5    | 7    | 2    | 6    | 5    | 4    | 6    | 4  |
| 29             | Common Tags | Disease                                   | 0    | 0    | 1    | 0    | 1    | 4    | 5    | 5    | 6    | 8    | 9    | 17   | 10   | 7    | 17 |
| 30             | Common Tags | DNase-Seq                                 | 0    | 0    | 0    | 0    | 1    | 0    | 0    | 1    | 0    | 0    | 0    | 0    | 1    | 0    |    |
| 31             | Common Tags | Drug                                      | 0    | 0    | 0    | 0    | 0    | 0    | 1    | 0    | 2    | 0    | 2    | 1    | 3    | 4    |    |
| 32             | Common Tags | Enrichment Analysis                       | 0    | 0    | 0    | 0    | 2    | 0    | 2    | 3    | 2    | 9    | 4    | 2    | 8    | 10   | 2  |
| 33             | Common Tags | Environmental Factor                      | 0    | 0    | 0    | 0    | 0    | 0    | 0    | 1    | 1    | 0    | 2    | 0    | 0    | 0    |    |
| 34             | Common Tags | Epigenetic                                | 0    | 0    | 0    | 0    | 0    | 1    | 0    | 0    | 0    | 0    | 1    | 1    | 0    | 1    | 1  |
| 35             | Common Tags | Epilepsy                                  | 0    | 0    | 0    | 0    | 0    | 0    | 0    | 0    | 0    | 0    | 0    | 0    | 1    | 0    |    |
| 36             | Common Tags | Evolution                                 | 2    | 1    | 3    | 0    | 2    | 3    | 4    | 3    | 3    | 1    | 1    | 1    | 4    | 2    | 1  |
| 37             | Common Tags | Exosome                                   | 0    | 0    | 0    | 0    | 0    | 1    | 0    | 0    | 4    | 0    | 1    | 2    | 1    | 0    |    |
| 38             | Common Tags | Experimentally Validated                  | 0    | 0    | 0    | 1    | 0    | 0    | 2    | 1    | 2    | 2    | 3    | 2    | 5    | 1    | 1  |
| 39             | Common Tags | Expressed Sequence Tag (EST)              | 0    | 0    | 0    | 0    | 0    | 1    | 1    | 2    | 1    | 0    | 0    | 0    | 0    | 0    |    |
| 40             | Common Tags | Expression Profiles                       | 1    | 1    | 0    | 1    | 6    | 5    | 7    | 19   | 13   | 15   | 15   | 16   | 17   | 16   | 16 |
| 41             | Common Tags | Expression Quantitative Trait Loci (eQTL) | 0    | 0    | 0    | 1    | 1    | 0    | 0    | 1    | 0    | 2    | 0    | 2    | 0    | 0    | 0  |
| 42             | Common Tags | Extracellular Vesicles (EVs)              | 0    | 0    | 0    | 0    | 0    | 0    | 0    | 0    | 0    | 0    | 0    | 2    | 0    | 0    |    |
| 43             | Common Tags | Free Energy                               | 0    | 0    | 0    | 0    | 0    | 0    | 0    | 0    | 1    | 0    | 0    | 0    | 3    | 0    |    |

|    | Tag Categories | Tags                                 | 2003 | 2004 | 2005 | 2006 | 2007 | 2008 | 2009 | 2010 | 2011 | 2012 | 2013 | 2014 | 2015 | 2016 | 2017 |
|----|----------------|--------------------------------------|------|------|------|------|------|------|------|------|------|------|------|------|------|------|------|
| 44 | Common Tags    | Functional Annotation                | 0    | 2    | 2    | 2    | 3    | 10   | 3    | 6    | 11   | 6    | 6    | 7    | 6    | 8    | 3    |
| 45 | Common Tags    | Gene Ontology                        | 0    | 0    | 1    | 0    | 1    | 2    | 2    | 0    | 2    | 4    | 1    | 1    | 4    | 7    | 1    |
| 46 | Common Tags    | Genome Wide Association Study (GWAS) | 0    | 0    | 0    | 0    | 0    | 0    | 1    | 0    | 1    | 2    | 0    | 0    | 1    | 1    | 0    |
| 47 | Common Tags    | Hairpin Structure                    | 1    | 0    | 0    | 3    | 2    | 2    | 0    | 0    | 1    | 3    | 0    | 0    | 2    | 1    | 0    |
| 48 | Common Tags    | High-throughput Screening (HTS)      | 0    | 0    | 0    | 0    | 0    | 0    | 0    | 1    | 0    | 0    | 0    | 0    | 1    | 0    | 0    |
| 49 | Common Tags    | Huntington's disease                 | 0    | 0    | 0    | 0    | 0    | 0    | 0    | 0    | 0    | 0    | 0    | 0    | 0    | 1    | 0    |
| 50 | Common Tags    | Hybridization                        | 0    | 1    | 0    | 1    | 0    | 0    | 0    | 0    | 0    | 0    | 0    | 0    | 0    | 0    | 0    |
| 51 | Common Tags    | ID Conversion                        | 0    | 0    | 1    | 0    | 1    | 1    | 0    | 0    | 1    | 3    | 0    | 3    | 1    | 4    | 1    |
| 52 | Common Tags    | Identification                       | 0    | 0    | 4    | 5    | 5    | 5    | 3    | 10   | 6    | 9    | 7    | 6    | 2    | 12   | 5    |
| 53 | Common Tags    | Integrated Analysis                  | 0    | 0    | 1    | 1    | 1    | 3    | 2    | 4    | 5    | 9    | 8    | 5    | 11   | 6    | 7    |
| 54 | Common Tags    | Integrated Knowledge                 | 0    | 0    | 1    | 0    | 0    | 1    | 1    | 2    | 2    | 4    | 1    | 5    | 3    | 2    | 2    |
| 55 | Common Tags    | Integration of Tools                 | 0    | 0    | 0    | 0    | 0    | 0    | 1    | 1    | 3    | 3    | 1    | 2    | 2    | 1    | 3    |
| 56 | Common Tags    | Interactions                         | 0    | 0    | 1    | 4    | 3    | 8    | 4    | 6    | 11   | 12   | 19   | 15   | 26   | 26   | 18   |
| 57 | Common Tags    | Intergenic/Intronic miRNA            | 0    | 0    | 0    | 0    | 0    | 0    | 1    | 1    | 1    | 2    | 3    | 2    | 0    | 0    | 2    |
| 58 | Common Tags    | Intragenic miRNA                     | 0    | 0    | 0    | 0    | 0    | 0    | 0    | 0    | 0    | 0    | 1    | 1    | 0    | 0    | 1    |
| 59 | Common Tags    | IsomiR                               | 0    | 0    | 0    | 0    | 0    | 0    | 0    | 5    | 1    | 1    | 6    | 3    | 4    | 8    | 9    |
| 60 | Common Tags    | lncRNA                               | 1    | 0    | 2    | 1    | 0    | 2    | 1    | 2    | 2    | 3    | 9    | 7    | 7    | 15   | 5    |
| 61 | Common Tags    | Methylation                          | 0    | 0    | 0    | 0    | 0    | 0    | 0    | 0    | 0    | 0    | 0    | 0    | 1    | 0    | 1    |
| 62 | Common Tags    | Microarray Analysis                  | 0    | 0    | 0    | 2    | 2    | 2    | 2    | 2    | 4    | 2    | 2    | 2    | 2    | 1    | 0    |
| 63 | Common Tags    | miRNA Activity                       | 0    | 0    | 0    | 0    | 0    | 0    | 0    | 0    | 1    | 0    | 1    | 0    | 0    | 1    | 0    |
| 64 | Common Tags    | miRNA Annotations                    | 0    | 1    | 1    | 2    | 1    | 5    | 1    | 1    | 2    | 2    | 1    | 3    | 1    | 6    | 3    |
| 65 | Common Tags    | miRNA Binding Site                   | 0    | 1    | 2    | 4    | 4    | 6    | 4    | 7    | 7    | 8    | 11   | 12   | 11   | 3    | 6    |
| 66 | Common Tags    | miRNA Cluster                        | 0    | 1    | 1    | 2    | 0    | 2    | 0    | 3    | 1    | 1    | 1    | 1    | 0    | 1    | 1    |
| 67 | Common Tags    | miRNA Family                         | 2    | 0    | 2    | 0    | 0    | 2    | 3    | 2    | 3    | 2    | 2    | 1    | 1    | 1    | 0    |
| 68 | Common Tags    | miRNA Homologs                       | 1    | 0    | 3    | 2    | 0    | 2    | 1    | 1    | 1    | 2    | 2    | 1    | 2    | 0    | 0    |
| 69 | Common Tags    | miRNA Prediction                     | 2    | 0    | 8    | 3    | 7    | 6    | 8    | 14   | 10   | 16   | 13   | 9    | 16   | 10   | 9    |
| 70 | Common Tags    | miRNA Publication                    | 0    | 0    | 0    | 0    | 0    | 0    | 0    | 1    | 0    | 0    | 0    | 0    | 1    | 0    | 0    |
| 71 | Common Tags    | miRNA Regulation                     | 0    | 0    | 0    | 0    | 0    | 0    | 2    | 3    | 3    | 3    | 3    | 4    | 2    | 3    | 1    |
| 72 | Common Tags    | miRNA-Seq                            | 0    | 0    | 0    | 0    | 1    | 1    | 2    | 4    | 1    | 4    | 9    | 5    | 9    | 4    | 6    |
| 73 | Common Tags    | Mutation                             | 0    | 0    | 0    | 1    | 0    | 0    | 0    | 0    | 1    | 0    | 2    | 0    | 0    | 3    | 0    |
| 74 | Common Tags    | ncRNAs                               | 0    | 0    | 5    | 2    | 4    | 4    | 1    | 4    | 2    | 4    | 5    | 3    | 1    | 6    | 2    |
| 75 | Common Tags    | Next Generation Sequencing (NGS)     | 0    | 1    | 0    | 2    | 0    | 7    | 5    | 13   | 13   | 11   | 12   | 7    | 9    | 10   | 11   |
| 76 | Common Tags    | Nomenclature                         | 0    | 1    | 0    | 2    | 0    | 2    | 0    | 1    | 1    | 0    | 0    | 1    | 2    | 0    | 0    |
| 77 | Common Tags    | Normalization                        | 0    | 0    | 0    | 0    | 0    | 0    | 0    | 0    | 1    | 1    | 1    | 2    | 0    | 0    | 0    |
| 78 | Common Tags    | Off-targets                          | 0    | 0    | 0    | 0    | 1    | 0    | 0    | 0    | 1    | 0    | 1    | 0    | 0    | 1    | 0    |
| 79 | Common Tags    | Ontology                             | 0    | 0    | 0    | 0    | 0    | 0    | 0    | 0    | 0    | 0    | 0    | 0    | 0    | 1    | 0    |
| 80 | Common Tags    | PAR-CLIP                             | 0    | 0    | 0    | 0    | 0    | 0    | 0    | 0    | 3    | 0    | 4    | 2    | 0    | 3    | 0    |
| 81 | Common Tags    | Parkinson's Disease                  | 0    | 0    | 0    | 0    | 0    | 0    | 1    | 0    | 0    | 0    | 0    | 1    | 0    | 1    | 1    |
| 82 | Common Tags    | Pathway                              | 0    | 0    | 0    | 1    | 1    | 2    | 2    | 2    | 3    | 11   | 5    | 4    | 4    | 6    | 6    |
| 83 | Common Tags    | Phenotype                            | 0    | 0    | 0    | 0    | 0    | 1    | 2    | 1    | 1    | 1    | 0    | 0    | 0    | 1    | 0    |
| 84 | Common Tags    | piRNA                                | 0    | 0    | 1    | 0    | 1    | 0    | 0    | 1    | 0    | 1    | 1    | 1    | 2    | 0    | 2    |
| 85 | Common Tags    | pre-miRNA                            | 0    | 0    | 4    | 4    | 2    | 3    | 1    | 4    | 3    | 3    | 6    | 4    | 9    | 11   | 3    |
| 86 | Common Tags    | Promoter                             | 0    | 0    | 0    | 0    | 0    | 0    | 0    | 0    | 0    | 0    | 1    | 0    | 1    | 0    | 1    |
| 87 | Common Tags    | Protein-protein Interaction (PPI)    | 0    | 0    | 0    | 0    | 0    | 0    | 1    | 2    | 0    | 1    | 0    | 0    | 3    | 2    | 1    |
| 88 | Common Tags    | Pseudo Hairpin                       | 0    | 0    | 0    | 0    | 2    | 0    | 1    | 0    | 1    | 0    | 1    | 0    | 1    | 0    | 0    |
| 89 | Common Tags    | Regulatory Network                   | 0    | 0    | 0    | 3    | 1    | 4    | 2    | 11   | 12   | 11   | 15   | 17   | 19   | 23   | 14   |

|     | Tag Categories      | Tags                                    | 2003 | 2004 | 2005 | 2006 | 2007 | 2008 | 2009 | 2010 | 2011 | 2012 | 2013 | 2014 | 2015 | 2016 | 2017 |
|-----|---------------------|-----------------------------------------|------|------|------|------|------|------|------|------|------|------|------|------|------|------|------|
| 90  | Common Tags         | RNA Editing                             | 0    | 0    | 0    | 0    | 0    | 0    | 0    | 0    | 0    | 0    | 0    | 0    | 2    | 2    | 2    |
| 91  | Common Tags         | RNA Modification                        | 0    | 0    | 0    | 0    | 0    | 0    | 0    | 0    | 0    | 0    | 0    | 0    | 0    | 1    | 1    |
| 92  | Common Tags         | RNA-binding Protein (RBP)               | 0    | 0    | 0    | 0    | 0    | 0    | 0    | 0    | 2    | 1    | 2    | 2    | 2    | 3    | 5    |
| 93  | Common Tags         | RNAi                                    | 0    | 0    | 0    | 0    | 0    | 0    | 0    | 0    | 1    | 1    | 1    | 0    | 0    | 0    | 0    |
| 94  | Common Tags         | RNA-Seq                                 | 0    | 0    | 0    | 1    | 1    | 1    | 2    | 2    | 0    | 3    | 3    | 5    | 4    | 9    | 0    |
| 95  | Common Tags         | Secondary Structure                     | 2    | 0    | 4    | 4    | 1    | 3    | 3    | 6    | 1    | 2    | 2    | 2    | 2    | 5    | 1    |
| 96  | Common Tags         | Secreted/Extracellular/Ciculating miRNA | 0    | 0    | 0    | 0    | 0    | 1    | 1    | 0    | 0    | 4    | 0    | 2    | 3    | 3    | 0    |
| 97  | Common Tags         | Seed Match                              | 0    | 0    | 0    | 0    | 1    | 1    | 0    | 1    | 1    | 0    | 1    | 2    | 1    | 0    | 0    |
| 98  | Common Tags         | Sequence Annotation                     | 1    | 2    | 3    | 4    | 4    | 7    | 3    | 5    | 5    | 4    | 5    | 6    | 8    | 3    | 4    |
| 99  | Common Tags         | Sequence Motif                          | 0    | 0    | 1    | 0    | 0    | 1    | 0    | 1    | 2    | 0    | 1    | 0    | 1    | 1    | 1    |
| 100 | Common Tags         | Sequential Mapping                      | 0    | 0    | 0    | 0    | 0    | 0    | 0    | 0    | 0    | 2    | 0    | 1    | 1    | 0    | 1    |
| 101 | Common Tags         | Sequential Trimming                     | 0    | 0    | 0    | 0    | 0    | 0    | 0    | 0    | 0    | 1    | 0    | 1    | 1    | 0    | 0    |
| 102 | Common Tags         | Single Nucleotide Polymorphism (SNP)    | 0    | 0    | 0    | 1    | 1    | 1    | 4    | 2    | 2    | 6    | 2    | 5    | 7    | 3    | 1    |
| 103 | Common Tags         | siRNA                                   | 0    | 1    | 2    | 0    | 4    | 2    | 2    | 3    | 1    | 1    | 3    | 6    | 3    | 6    | 0    |
| 104 | Common Tags         | Small Molecules                         | 0    | 0    | 0    | 0    | 0    | 0    | 0    | 0    | 0    | 1    | 0    | 0    | 0    | 1    | 0    |
| 105 | Common Tags         | Stem Cell                               | 0    | 0    | 0    | 0    | 0    | 0    | 0    | 1    | 0    | 1    | 0    | 0    | 1    | 1    | 0    |
| 106 | Common Tags         | Stress                                  | 0    | 0    | 0    | 0    | 0    | 0    | 0    | 0    | 0    | 0    | 1    | 0    | 1    | 0    | 0    |
| 107 | Common Tags         | Target Gene                             | 1    | 3    | 3    | 11   | 10   | 14   | 10   | 23   | 24   | 19   | 12   | 16   | 21   | 7    | 13   |
| 108 | Common Tags         | Target Prediction                       | 2    | 4    | 8    | 7    | 13   | 8    | 11   | 19   | 23   | 17   | 20   | 19   | 18   | 22   | 17   |
| 109 | Common Tags         | Tertiary/Triplex/3D Structures          | 0    | 0    | 1    | 1    | 0    | 0    | 0    | 0    | 0    | 0    | 0    | 1    | 0    | 1    | 0    |
| 110 | Common Tags         | The Cancer Genome Atlas (TCGA)          | 0    | 0    | 0    | 0    | 0    | 1    | 0    | 1    | 3    | 3    | 7    | 4    | 12   | 14   | 11   |
| 111 | Common Tags         | Thermodynamics                          | 0    | 0    | 2    | 0    | 2    | 0    | 0    | 2    | 0    | 1    | 1    | 0    | 0    | 2    | 1    |
| 112 | Common Tags         | Tissues                                 | 0    | 1    | 0    | 2    | 0    | 2    | 0    | 3    | 2    | 0    | 0    | 1    | 0    | 5    | 3    |
| 113 | Common Tags         | Tissue-specific miRNA                   | 0    | 0    | 0    | 0    | 0    | 0    | 2    | 2    | 2    | 1    | 0    | 3    | 1    | 5    | 6    |
| 114 | Common Tags         | Tools Gallery                           | 0    | 0    | 1    | 1    | 1    | 1    | 1    | 1    | 1    | 5    | 0    | 1    | 0    | 1    | 1    |
| 115 | Common Tags         | Transcription Factors (TFs)             | 0    | 0    | 1    | 3    | 2    | 1    | 3    | 5    | 4    | 7    | 2    | 2    | 11   | 6    | 2    |
| 116 | Common Tags         | Transcriptional Start Sites (TSSs)      | 0    | 0    | 0    | 0    | 1    | 0    | 0    | 1    | 0    | 1    | 0    | 1    | 1    | 1    | 1    |
| 117 | Common Tags         | Transposable Elements                   | 0    | 0    | 0    | 0    | 0    | 1    | 0    | 0    | 0    | 1    | 0    | 0    | 1    | 1    | 0    |
| 118 | Common Tags         | Visualization                           | 0    | 0    | 0    | 0    | 0    | 1    | 0    | 0    | 0    | 3    | 3    | 4    | 3    | 1    | 6    |
| 119 | Implement Technique | AngularJS                               | 0    | 0    | 0    | 0    | 0    | 0    | 0    | 0    | 1    | 0    | 0    | 0    | 1    | 3    | 1    |
| 120 | Implement Technique | Arfoo                                   | 0    | 0    | 0    | 0    | 0    | 0    | 0    | 0    | 0    | 0    | 0    | 1    | 0    | 0    | 0    |
| 121 | Implement Technique | ASP .NET                                | 0    | 0    | 1    | 0    | 1    | 0    | 0    | 0    | 1    | 0    | 0    | 0    | 0    | 2    | 1    |
| 122 | Implement Technique | Awk                                     | 0    | 0    | 0    | 0    | 0    | 0    | 0    | 0    | 0    | 0    | 0    | 0    | 0    | 1    | 0    |
| 123 | Implement Technique | Bash                                    | 0    | 0    | 0    | 0    | 0    | 0    | 0    | 1    | 0    | 2    | 0    | 1    | 1    | 1    | 2    |
| 124 | Implement Technique | Bioconductor                            | 0    | 0    | 0    | 0    | 0    | 0    | 0    | 0    | 1    | 1    | 1    | 4    | 2    | 4    | 4    |
| 125 | Implement Technique | BioJava                                 | 0    | 0    | 0    | 0    | 0    | 0    | 0    | 1    | 0    | 0    | 1    | 1    | 0    | 1    | 0    |
| 126 | Implement Technique | BioJS                                   | 0    | 0    | 0    | 0    | 1    | 0    | 0    | 0    | 1    | 0    | 0    | 0    | 0    | 1    | 0    |
| 127 | Implement Technique | Bioperl                                 | 0    | 0    | 2    | 0    | 0    | 4    | 1    | 1    | 0    | 1    | 0    | 0    | 1    | 1    | 0    |
| 128 | Implement Technique | Bootstrap                               | 0    | 0    | 0    | 0    | 0    | 0    | 0    | 0    | 0    | 1    | 0    | 0    | 3    | 8    | 2    |
| 129 | Implement Technique | C#                                      | 0    | 0    | 1    | 0    | 1    | 0    | 0    | 1    | 1    | 1    | 1    | 0    | 1    | 3    | 0    |
| 130 | Implement Technique | C/C++                                   | 1    | 1    | 3    | 6    | 2    | 9    | 8    | 8    | 6    | 6    | 6    | 3    | 9    | 5    | 5    |
| 131 | Implement Technique | CodeIgniter                             | 0    | 0    | 0    | 0    | 0    | 0    | 0    | 0    | 0    | 0    | 0    | 1    | 0    | 0    | 0    |
| 132 | Implement Technique | CRAN                                    | 0    | 0    | 0    | 0    | 0    | 0    | 0    | 0    | 0    | 3    | 2    | 2    | 3    | 1    | 2    |
| 133 | Implement Technique | CUDA                                    | 0    | 0    | 0    | 0    | 0    | 0    | 0    | 0    | 0    | 0    | 0    | 1    | 0    | 0    | 0    |
| 134 | Implement Technique | Cytoscape                               | 0    | 0    | 0    | 0    | 0    | 0    | 0    | 1    | 0    | 0    | 2    | 2    | 1    | 1    | 0    |

|     | Tag Categories      | Tags              | 2003 | 2004 | 2005 | 2006 | 2007 | 2008 | 2009 | 2010 | 2011 | 2012 | 2013 | 2014 | 2015 | 2016 | 2017 |
|-----|---------------------|-------------------|------|------|------|------|------|------|------|------|------|------|------|------|------|------|------|
| 135 | Implement Technique | Cytoscape.js      | 0    | 0    | 0    | 0    | 0    | 0    | 0    | 2    | 1    | 3    | 1    | 2    | 5    | 2    | 2    |
| 136 | Implement Technique | D3.js             | 0    | 0    | 0    | 0    | 0    | 0    | 0    | 0    | 0    | 1    | 0    | 0    | 4    | 3    | 3    |
| 137 | Implement Technique | Django            | 0    | 0    | 0    | 0    | 0    | 1    | 0    | 1    | 1    | 3    | 0    | 1    | 3    | 1    | 2    |
| 138 | Implement Technique | Ext JS            | 0    | 0    | 0    | 0    | 0    | 0    | 0    | 1    | 0    | 0    | 0    | 0    | 0    | 0    | 0    |
| 139 | Implement Technique | Flask             | 0    | 0    | 0    | 0    | 0    | 0    | 0    | 0    | 0    | 1    | 0    | 0    | 2    | 0    | 0    |
| 140 | Implement Technique | Hadoop            | 0    | 0    | 0    | 0    | 0    | 0    | 0    | 0    | 0    | 0    | 0    | 0    | 1    | 0    | 0    |
| 141 | Implement Technique | HSQLDB            | 0    | 0    | 0    | 0    | 0    | 0    | 0    | 0    | 0    | 0    | 0    | 1    | 0    | 0    | 0    |
| 142 | Implement Technique | HTML5             | 0    | 0    | 0    | 0    | 0    | 0    | 0    | 0    | 0    | 4    | 0    | 1    | 3    | 4    | 1    |
| 143 | Implement Technique | Java              | 0    | 1    | 2    | 4    | 5    | 5    | 7    | 16   | 8    | 13   | 16   | 14   | 12   | 15   | 14   |
| 144 | Implement Technique | JavaScript        | 0    | 0    | 0    | 2    | 2    | 0    | 2    | 2    | 9    | 13   | 14   | 20   | 26   | 14   | 6    |
| 145 | Implement Technique | JavaServer Faces  | 0    | 0    | 0    | 0    | 0    | 0    | 0    | 0    | 0    | 0    | 0    | 0    | 0    | 1    | 0    |
| 146 | Implement Technique | JQuery            | 0    | 0    | 0    | 1    | 0    | 0    | 0    | 3    | 1    | 4    | 3    | 8    | 11   | 11   | 1    |
| 147 | Implement Technique | JSP               | 0    | 0    | 0    | 0    | 0    | 1    | 2    | 3    | 7    | 3    | 6    | 8    | 7    | 7    | 6    |
| 148 | Implement Technique | Laravel           | 0    | 0    | 0    | 0    | 0    | 0    | 0    | 0    | 0    | 0    | 0    | 0    | 0    | 1    | 1    |
| 149 | Implement Technique | Mako              | 0    | 0    | 0    | 0    | 0    | 0    | 0    | 0    | 1    | 0    | 0    | 1    | 0    | 0    | 0    |
| 150 | Implement Technique | MATLAB            | 1    | 0    | 0    | 0    | 1    | 3    | 0    | 1    | 1    | 5    | 2    | 0    | 7    | 5    | 6    |
| 151 | Implement Technique | MongoDB           | 0    | 0    | 0    | 0    | 0    | 0    | 0    | 0    | 0    | 0    | 0    | 0    | 1    | 1    | 1    |
| 152 | Implement Technique | MySQL             | 1    | 0    | 5    | 6    | 4    | 6    | 14   | 16   | 17   | 33   | 23   | 27   | 32   | 19   | 24   |
| 153 | Implement Technique | Neo4j             | 0    | 0    | 0    | 0    | 0    | 0    | 0    | 0    | 1    | 0    | 0    | 0    | 0    | 1    | 0    |
| 154 | Implement Technique | Node.js           | 0    | 0    | 0    | 0    | 0    | 0    | 0    | 0    | 0    | 0    | 0    | 1    | 0    | 1    | 2    |
| 155 | Implement Technique | NoSQL             | 0    | 0    | 0    | 0    | 0    | 0    | 0    | 0    | 1    | 0    | 0    | 1    | 0    | 1    | 3    |
| 156 | Implement Technique | Objective-C       | 0    | 0    | 0    | 0    | 0    | 0    | 0    | 0    | 0    | 0    | 0    | 0    | 0    | 0    | 1    |
| 157 | Implement Technique | Oracle            | 0    | 0    | 0    | 1    | 0    | 0    | 1    | 1    | 0    | 1    | 0    | 0    | 0    | 0    | 0    |
| 158 | Implement Technique | Pascal            | 0    | 0    | 0    | 0    | 0    | 0    | 0    | 1    | 0    | 0    | 0    | 0    | 0    | 0    | 1    |
| 159 | Implement Technique | Perl              | 2    | 3    | 7    | 7    | 8    | 17   | 14   | 18   | 12   | 20   | 18   | 23   | 19   | 18   | 10   |
| 160 | Implement Technique | PHP               | 0    | 0    | 3    | 8    | 4    | 12   | 11   | 17   | 30   | 35   | 26   | 32   | 39   | 34   | 28   |
| 161 | Implement Technique | Play Framework    | 0    | 0    | 0    | 0    | 0    | 0    | 0    | 0    | 0    | 0    | 0    | 0    | 1    | 1    | 0    |
| 162 | Implement Technique | PostgreSQL        | 0    | 0    | 0    | 1    | 4    | 0    | 0    | 3    | 0    | 0    | 2    | 1    | 4    | 4    | 0    |
| 163 | Implement Technique | Python            | 0    | 0    | 1    | 1    | 3    | 4    | 2    | 7    | 7    | 13   | 9    | 16   | 21   | 19   | 21   |
| 164 | Implement Technique | R                 | 0    | 1    | 0    | 0    | 3    | 5    | 6    | 6    | 12   | 18   | 17   | 31   | 25   | 21   | 19   |
| 165 | Implement Technique | Rails             | 0    | 0    | 0    | 0    | 0    | 0    | 0    | 1    | 0    | 0    | 0    | 1    | 2    | 0    | 0    |
| 166 | Implement Technique | RESTful           | 0    | 0    | 0    | 0    | 0    | 0    | 0    | 1    | 0    | 4    | 1    | 0    | 4    | 0    | 3    |
| 167 | Implement Technique | Ruby              | 0    | 0    | 0    | 0    | 2    | 0    | 1    | 1    | 0    | 2    | 2    | 3    | 2    | 0    | 0    |
| 168 | Implement Technique | Scala             | 0    | 0    | 0    | 0    | 0    | 0    | 0    | 0    | 0    | 0    | 0    | 0    | 1    | 0    | 0    |
| 169 | Implement Technique | Shiny             | 0    | 0    | 0    | 0    | 0    | 0    | 0    | 0    | 0    | 0    | 0    | 0    | 1    | 0    | 3    |
| 170 | Implement Technique | SOAP              | 0    | 0    | 1    | 0    | 1    | 1    | 1    | 0    | 0    | 2    | 0    | 1    | 0    | 2    | 0    |
| 171 | Implement Technique | Spark             | 0    | 0    | 0    | 0    | 0    | 0    | 0    | 0    | 0    | 0    | 0    | 0    | 1    | 0    | 0    |
| 172 | Implement Technique | SPARQL            | 0    | 0    | 0    | 0    | 0    | 0    | 0    | 0    | 0    | 0    | 0    | 0    | 0    | 1    | 0    |
| 173 | Implement Technique | SQL Server        | 0    | 0    | 1    | 0    | 1    | 0    | 0    | 0    | 0    | 1    | 0    | 0    | 0    | 2    | 0    |
| 174 | Implement Technique | SQLite            | 0    | 0    | 0    | 0    | 0    | 2    | 0    | 1    | 1    | 0    | 0    | 1    | 1    | 0    | 2    |
| 175 | Implement Technique | Symfony           | 0    | 0    | 0    | 0    | 0    | 0    | 0    | 0    | 0    | 0    | 0    | 0    | 0    | 1    | 0    |
| 176 | Implement Technique | Tcl               | 0    | 0    | 0    | 0    | 0    | 0    | 0    | 0    | 0    | 0    | 0    | 0    | 0    | 1    | 0    |
| 177 | Implement Technique | Thymeleaf         | 0    | 0    | 0    | 0    | 0    | 0    | 0    | 0    | 0    | 0    | 0    | 0    | 0    | 0    | 1    |
| 178 | Implement Technique | Visual Basic      | 0    | 0    | 0    | 0    | 0    | 1    | 0    | 0    | 0    | 0    | 0    | 0    | 0    | 0    | 0    |
| 179 | Implement Technique | Visual Basic .NET | 0    | 0    | 0    | 0    | 0    | 0    | 0    | 0    | 1    | 0    | 0    | 0    | 0    | 0    | 0    |
| 180 | Implement Technique | Yii               | 0    | 0    | 0    | 0    | 1    | 0    | 0    | 1    | 0    | 0    | 0    | 0    | 0    | 1    | 0    |
| 181 | Implement Technique | ZOPE              | 0    | 0    | 0    | 0    | 0    | 0    | 1    | 0    | 0    | 2    | 0    | 0    | 0    | 1    | 0    |

|     | Tag Categories | Tags                                    | 2003 | 2004 | 2005 | 2006 | 2007 | 2008 | 2009 | 2010 | 2011 | 2012 | 2013 | 2014 | 2015 | 2016 | 2017 |
|-----|----------------|-----------------------------------------|------|------|------|------|------|------|------|------|------|------|------|------|------|------|------|
| 182 | Methods        | AdaBoost                                | 0    | 0    | 0    | 0    | 1    | 0    | 0    | 0    | 1    | 0    | 1    | 0    | 0    | 0    | 0    |
| 183 | Methods        | Analysis of Variance (ANOVA)            | 0    | 0    | 0    | 0    | 0    | 0    | 0    | 0    | 0    | 1    | 0    | 2    | 1    | 1    | 0    |
| 184 | Methods        | Artificial Neural Network (ANN)         | 0    | 0    | 0    | 0    | 0    | 0    | 0    | 0    | 1    | 0    | 3    | 0    | 0    | 2    | 0    |
| 185 | Methods        | Bayesian Inference                      | 0    | 0    | 0    | 0    | 1    | 0    | 0    | 0    | 0    | 1    | 0    | 0    | 0    | 0    | 0    |
| 186 | Methods        | Bayesian Network (BN)                   | 0    | 0    | 0    | 0    | 1    | 0    | 0    | 0    | 0    | 1    | 0    | 1    | 1    | 0    | 0    |
| 187 | Methods        | Bayesian Statistics                     | 0    | 0    | 0    | 0    | 0    | 1    | 0    | 0    | 0    | 1    | 0    | 1    | 0    | 0    | 0    |
| 188 | Methods        | Betweenness Centrality Clustering (BCC) | 0    | 0    | 0    | 0    | 0    | 1    | 0    | 0    | 0    | 0    | 0    | 0    | 0    | 0    | 0    |
| 189 | Methods        | Bicliques Merging                       | 0    | 0    | 0    | 0    | 0    | 0    | 0    | 0    | 0    | 0    | 0    | 0    | 0    | 1    | 0    |
| 190 | Methods        | Biclustering                            | 0    | 0    | 0    | 0    | 0    | 0    | 0    | 0    | 1    | 0    | 0    | 1    | 1    | 0    | 0    |
| 191 | Methods        | Boosting                                | 0    | 0    | 1    | 0    | 0    | 0    | 0    | 1    | 2    | 0    | 0    | 0    | 1    | 0    | 1    |
| 192 | Methods        | Burrows-Wheeler Transform (BWT)         | 0    | 0    | 0    | 0    | 0    | 0    | 2    | 0    | 0    | 0    | 0    | 0    | 0    | 0    | 0    |
| 193 | Methods        | C4.5                                    | 0    | 0    | 0    | 0    | 0    | 1    | 0    | 0    | 0    | 0    | 0    | 0    | 0    | 1    | 1    |
| 194 | Methods        | Complete-linkage Clustering             | 0    | 0    | 0    | 0    | 0    | 0    | 0    | 0    | 0    | 0    | 0    | 0    | 0    | 1    | 0    |
| 195 | Methods        | Conditional Random Fields (CRFs)        | 0    | 0    | 1    | 0    | 0    | 0    | 0    | 0    | 0    | 0    | 0    | 0    | 0    | 0    | 0    |
| 196 | Methods        | Convolutional Neural Network (CNN)      | 0    | 0    | 0    | 0    | 0    | 0    | 0    | 0    | 0    | 0    | 0    | 0    | 0    | 1    | 2    |
| 197 | Methods        | Decision Tree                           | 0    | 0    | 0    | 0    | 0    | 0    | 0    | 0    | 0    | 2    | 0    | 0    | 1    | 0    | 0    |
| 198 | Methods        | Deep Belief Network (DBN)               | 0    | 0    | 0    | 0    | 0    | 0    | 0    | 0    | 0    | 0    | 0    | 0    | 0    | 0    | 1    |
| 199 | Methods        | Dynamic Programming Algorithms          | 1    | 0    | 0    | 2    | 0    | 2    | 0    | 2    | 1    | 1    | 0    | 1    | 1    | 1    | 1    |
| 200 | Methods        | Empirical Algorithmics                  | 0    | 0    | 0    | 0    | 0    | 0    | 0    | 0    | 0    | 0    | 0    | 0    | 1    | 0    | 0    |
| 201 | Methods        | Empirical Bayes Methods                 | 0    | 0    | 0    | 0    | 0    | 0    | 0    | 0    | 0    | 0    | 1    | 0    | 0    | 0    | 0    |
| 202 | Methods        | Entropy                                 | 0    | 0    | 0    | 0    | 0    | 0    | 0    | 1    | 0    | 0    | 1    | 1    | 2    | 1    | 0    |
| 203 | Methods        | Expectation Maximisation (EM)           | 0    | 0    | 0    | 1    | 1    | 0    | 0    | 1    | 0    | 0    | 1    | 0    | 0    | 1    | 0    |
| 204 | Methods        | Fisher's Exact Test                     | 0    | 0    | 0    | 0    | 0    | 0    | 0    | 0    | 0    | 0    | 0    | 0    | 0    | 1    | 0    |
| 205 | Methods        | FP-growth Algorithm                     | 0    | 0    | 0    | 0    | 0    | 0    | 0    | 0    | 0    | 0    | 0    | 0    | 0    | 1    | 0    |
| 206 | Methods        | Gaussian Naive Bayes                    | 0    | 0    | 0    | 0    | 0    | 0    | 0    | 0    | 0    | 0    | 0    | 1    | 0    | 0    | 0    |
| 207 | Methods        | Genetic Algorithms (GA)                 | 0    | 0    | 1    | 0    | 0    | 0    | 0    | 0    | 0    | 0    | 0    | 0    | 1    | 0    | 0    |
| 208 | Methods        | Grid Search Method (PGS)                | 0    | 0    | 0    | 0    | 0    | 0    | 0    | 0    | 0    | 0    | 0    | 1    | 0    | 0    | 0    |
| 209 | Methods        | Hidden Markov Model (HMM)               | 0    | 0    | 1    | 1    | 1    | 0    | 2    | 0    | 1    | 0    | 2    | 0    | 1    | 0    | 1    |
| 210 | Methods        | Hierarchical Clustering                 | 0    | 0    | 0    | 0    | 0    | 0    | 1    | 1    | 0    | 0    | 0    | 1    | 1    | 0    | 2    |
| 211 | Methods        | Hypergeometric Test                     | 0    | 0    | 0    | 0    | 1    | 0    | 1    | 3    | 2    | 1    | 1    | 2    | 4    | 1    | 0    |
| 212 | Methods        | Information Gain                        | 0    | 0    | 0    | 0    | 0    | 0    | 0    | 0    | 2    | 0    | 0    | 0    | 0    | 1    | 1    |
| 213 | Methods        | Kemeny Optimal Aggregation (KOA)        | 0    | 0    | 0    | 0    | 0    | 0    | 0    | 0    | 0    | 0    | 1    | 0    | 0    | 0    | 0    |
| 214 | Methods        | k-Means                                 | 0    | 0    | 0    | 0    | 1    | 0    | 0    | 0    | 1    | 1    | 0    | 0    | 3    | 1    | 1    |
| 215 | Methods        | k-Medians                               | 0    | 0    | 0    | 0    | 0    | 0    | 0    | 0    | 0    | 0    | 0    | 0    | 1    | 0    | 0    |
| 216 | Methods        | k-Nearest Neighbour (kNN)               | 0    | 0    | 0    | 0    | 0    | 0    | 0    | 1    | 1    | 0    | 1    | 0    | 1    | 1    | 4    |
| 217 | Methods        | Kolmogorov-Smirnov Test                 | 0    | 0    | 0    | 0    | 0    | 0    | 0    | 0    | 0    | 0    | 0    | 0    | 0    | 1    | 0    |
| 218 | Methods        | LASSO                                   | 0    | 0    | 0    | 0    | 0    | 0    | 0    | 0    | 2    | 1    | 0    | 2    | 2    | 0    | 0    |
| 219 | Methods        | Linear Regression Analysis              | 0    | 0    | 0    | 0    | 0    | 0    | 0    | 0    | 1    | 3    | 3    | 4    | 1    | 0    | 0    |
| 220 | Methods        | Literature-based Discovery              | 0    | 0    | 0    | 0    | 0    | 0    | 0    | 0    | 0    | 0    | 0    | 0    | 0    | 2    | 0    |
| 221 | Methods        | Logistic Regression                     | 0    | 0    | 0    | 0    | 0    | 0    | 0    | 2    | 0    | 1    | 0    | 1    | 0    | 0    | 1    |
| 222 | Methods        | Manually Curated                        | 1    | 0    | 1    | 1    | 0    | 2    | 5    | 2    | 5    | 7    | 7    | 7    | 12   | 3    | 13   |
| 223 | Methods        | Markov Cluster (MCL)                    | 0    | 0    | 0    | 0    | 0    | 1    | 0    | 1    | 0    | 0    | 0    | 0    | 0    | 0    | 0    |
| 224 | Methods        | Markov Model                            | 0    | 0    | 0    | 0    | 0    | 0    | 0    | 0    | 0    | 1    | 0    | 0    | 1    | 0    | 0    |
| 225 | Methods        | Markov-Chain Monte-Carlo Methods (MCMC) | 0    | 0    | 0    | 0    | 0    | 0    | 0    | 0    | 0    | 1    | 0    | 0    | 0    | 0    | 0    |
| 226 | Methods        | Meta-analysis                           | 0    | 0    | 0    | 0    | 0    | 0    | 0    | 1    | 0    | 3    | 4    | 0    | 1    | 0    | 3    |

|     | <b>Tag Categories</b> | <b>Tags</b>                                | <b>2003</b> | <b>2004</b> | <b>2005</b> | <b>2006</b> | <b>2007</b> | <b>2008</b> | <b>2009</b> | <b>2010</b> | <b>2011</b> | <b>2012</b> | <b>2013</b> | <b>2014</b> | <b>2015</b> | <b>2016</b> | <b>2017</b> |
|-----|-----------------------|--------------------------------------------|-------------|-------------|-------------|-------------|-------------|-------------|-------------|-------------|-------------|-------------|-------------|-------------|-------------|-------------|-------------|
| 227 | <b>Methods</b>        | Minimal Redundancy Maximal Relevance       | 0           | 0           | 0           | 0           | 0           | 0           | 0           | 2           | 0           | 0           | 0           | 0           | 0           | 0           | 0           |
| 228 | <b>Methods</b>        | Molecular Dynamics                         | 0           | 0           | 0           | 0           | 0           | 0           | 0           | 0           | 0           | 0           | 0           | 1           | 0           | 0           | 0           |
| 229 | <b>Methods</b>        | Mutual Information                         | 0           | 0           | 0           | 0           | 0           | 0           | 0           | 1           | 1           | 0           | 0           | 0           | 2           | 2           | 2           |
| 230 | <b>Methods</b>        | Naive Bayes                                | 0           | 0           | 0           | 1           | 1           | 0           | 0           | 2           | 0           | 1           | 1           | 0           | 0           | 0           | 0           |
| 231 | <b>Methods</b>        | Non-negative Matrix Factorization (NMF)    | 0           | 0           | 0           | 0           | 0           | 0           | 0           | 0           | 0           | 0           | 0           | 0           | 0           | 1           | 1           |
| 232 | <b>Methods</b>        | Particle Swarm Optimization (PSO)          | 0           | 0           | 0           | 0           | 0           | 0           | 0           | 0           | 0           | 0           | 0           | 0           | 0           | 0           | 1           |
| 233 | <b>Methods</b>        | Penalized Generalized Estimating Equations | 0           | 0           | 0           | 0           | 0           | 0           | 0           | 0           | 0           | 0           | 0           | 1           | 0           | 0           | 0           |
| 234 | <b>Methods</b>        | Principal Component Analysis (PCA)         | 0           | 0           | 0           | 0           | 0           | 0           | 0           | 0           | 0           | 1           | 2           | 1           | 0           | 1           | 2           |
| 235 | <b>Methods</b>        | Random Forest                              | 0           | 0           | 0           | 0           | 1           | 0           | 2           | 0           | 4           | 1           | 4           | 3           | 3           | 4           | 6           |
| 236 | <b>Methods</b>        | Random Walk                                | 0           | 0           | 0           | 0           | 0           | 1           | 0           | 0           | 0           | 0           | 0           | 1           | 2           | 2           | 1           |
| 237 | <b>Methods</b>        | Self-Organizing Map (SOM)                  | 0           | 0           | 0           | 0           | 1           | 0           | 0           | 0           | 1           | 0           | 0           | 0           | 1           | 1           | 1           |
| 238 | <b>Methods</b>        | Semantic                                   | 0           | 0           | 0           | 0           | 0           | 0           | 0           | 0           | 1           | 0           | 1           | 0           | 0           | 1           | 0           |
| 239 | <b>Methods</b>        | Semi-Automatic Extraction                  | 0           | 0           | 0           | 0           | 0           | 0           | 0           | 0           | 0           | 0           | 0           | 1           | 0           | 0           | 0           |
| 240 | <b>Methods</b>        | Singular Value Decomposition (SVD)         | 0           | 0           | 0           | 0           | 0           | 0           | 0           | 0           | 0           | 0           | 0           | 0           | 0           | 1           | 0           |
| 241 | <b>Methods</b>        | Smith-Waterman Algorithm                   | 0           | 0           | 1           | 0           | 1           | 0           | 1           | 1           | 1           | 0           | 1           | 1           | 0           | 0           | 0           |
| 242 | <b>Methods</b>        | Support Vector Machines (SVM)              | 0           | 0           | 3           | 2           | 5           | 7           | 4           | 5           | 8           | 6           | 10          | 9           | 16          | 8           | 8           |
| 243 | <b>Methods</b>        | Support Vector Regression (SVR)            | 1           | 1           | 0           | 0           | 0           | 1           | 0           | 1           | 1           | 0           | 0           | 0           | 0           | 0           | 0           |
| 244 | <b>Methods</b>        | Survival Analysis                          | 0           | 0           | 0           | 0           | 0           | 0           | 0           | 0           | 1           | 0           | 2           | 2           | 0           | 2           | 2           |
| 245 | <b>Methods</b>        | SVM-RFE                                    | 0           | 0           | 0           | 0           | 0           | 2           | 0           | 1           | 0           | 0           | 0           | 0           | 1           | 1           | 0           |
| 246 | <b>Methods</b>        | Text Mining                                | 0           | 0           | 0           | 2           | 0           | 0           | 1           | 2           | 1           | 2           | 2           | 5           | 3           | 4           | 6           |
| 247 | <b>Methods</b>        | Wang-Landau Monte Carlo Methods            | 0           | 0           | 0           | 0           | 0           | 0           | 0           | 1           | 0           | 0           | 0           | 0           | 0           | 0           | 0           |
| 248 | <b>Species</b>        | Arabidopsis                                | 1           | 3           | 11          | 16          | 6           | 16          | 16          | 17          | 25          | 33          | 24          | 21          | 29          | 28          | 23          |
| 249 | <b>Species</b>        | Bacteria                                   | 3           | 1           | 5           | 10          | 3           | 14          | 10          | 12          | 8           | 14          | 8           | 10          | 15          | 6           | 10          |
| 250 | <b>Species</b>        | C. elegans                                 | 5           | 4           | 13          | 17          | 7           | 23          | 20          | 24          | 24          | 31          | 23          | 21          | 23          | 20          | 15          |
| 251 | <b>Species</b>        | Chicken                                    | 2           | 1           | 10          | 14          | 8           | 19          | 14          | 19          | 15          | 27          | 15          | 17          | 24          | 16          | 17          |
| 252 | <b>Species</b>        | Fruitfly                                   | 5           | 3           | 13          | 19          | 9           | 21          | 21          | 26          | 20          | 36          | 25          | 15          | 26          | 21          | 16          |
| 253 | <b>Species</b>        | Human                                      | 4           | 4           | 16          | 27          | 29          | 39          | 49          | 73          | 68          | 89          | 91          | ##          | ##          | ##          | 99          |
| 254 | <b>Species</b>        | Maize                                      | 2           | 2           | 7           | 12          | 3           | 12          | 11          | 15          | 16          | 21          | 15          | 10          | 18          | 20          | 18          |
| 255 | <b>Species</b>        | Mouse                                      | 4           | 3           | 15          | 23          | 18          | 27          | 24          | 39          | 34          | 51          | 42          | 36          | 52          | 35          | 34          |
| 256 | <b>Species</b>        | Rat                                        | 3           | 2           | 13          | 19          | 9           | 20          | 19          | 29          | 22          | 34          | 25          | 19          | 28          | 19          | 22          |
| 257 | <b>Species</b>        | Rice                                       | 1           | 3           | 6           | 12          | 6           | 12          | 11          | 18          | 21          | 22          | 20          | 15          | 18          | 23          | 20          |
| 258 | <b>Species</b>        | Soybean                                    | 1           | 1           | 5           | 10          | 3           | 10          | 10          | 15          | 13          | 20          | 12          | 12          | 17          | 16          | 17          |
| 259 | <b>Species</b>        | Tomato                                     | 1           | 1           | 5           | 9           | 2           | 11          | 9           | 14          | 14          | 19          | 13          | 12          | 15          | 14          | 19          |
| 260 | <b>Species</b>        | Virus                                      | 2           | 1           | 6           | 9           | 2           | 12          | 10          | 13          | 12          | 17          | 11          | 12          | 17          | 12          | 9           |
| 261 | <b>Species</b>        | Wheat                                      | 1           | 1           | 5           | 9           | 3           | 10          | 9           | 15          | 13          | 19          | 12          | 11          | 16          | 15          | 15          |
| 262 | <b>Species</b>        | Xenopus                                    | 2           | 1           | 6           | 12          | 3           | 15          | 11          | 17          | 12          | 21          | 11          | 11          | 16          | 12          | 13          |
| 263 | <b>Species</b>        | Zebrafish                                  | 3           | 1           | 13          | 15          | 8           | 17          | 16          | 21          | 17          | 31          | 19          | 16          | 24          | 18          | 14          |

The table is sorted alphabetically by column Tag Categories and Tags.
