# Supplementary material for: Trends in the development of miRNA bioinformatics tools
Source: PubMed Central journal article supplement — Brief Bioinform. 2019 Jun 17;20(5):1836–52. doi: 10.1093/bib/bby054 (PMC7414524; doi:10.1093/bib/bby054), 2019-06-17
Supplement: bby054_supp_st_4.pdf [file bby054_supp_st_4.pdf]

**Supplementary Table 4. miRNA tools with rank criterions.**

|    | <i>Tool Name</i>                       | <i>Latest Publication Year</i> | <i>Publication Count</i> | <i>Total Citation Count</i> | <i>Pagerank</i> |
|----|----------------------------------------|--------------------------------|--------------------------|-----------------------------|-----------------|
| 1  | miRBase                                | 2014                           | 8                        | 5071                        | 0.088842218     |
| 2  | Rfam                                   | 2015                           | 7                        | 1945                        | 0.082224101     |
| 3  | MiRscan                                | 2003                           | 2                        | 606                         | 0.050859724     |
| 4  | miRanda                                | 2010                           | 4                        | 2568                        | 0.049961846     |
| 5  | TargetScan                             | 2015                           | 5                        | 6229                        | 0.048958285     |
| 6  | miRNA - Target Gene Prediction at EMBL | 2005                           | 2                        | 867                         | 0.033035162     |
| 7  | PicTar                                 | 2006                           | 3                        | 1841                        | 0.03077312      |
| 8  | RNAhybrid                              | 2006                           | 2                        | 935                         | 0.023514229     |
| 9  | RNAz                                   | 2010                           | 3                        | 344                         | 0.022439145     |
| 10 | ViennaRNA                              | 2015                           | 5                        | 1560                        | 0.02041885      |
| 11 | DIANA-TarBase                          | 2017                           | 5                        | 683                         | 0.01702805      |
| 12 | miRDeep                                | 2012                           | 2                        | 686                         | 0.010835628     |
| 13 | smiRNadb                               | 2007                           | 1                        | 1276                        | 0.009049242     |
| 14 | DIANA-microT                           | 2013                           | 5                        | 520                         | 0.008861434     |
| 15 | PITA                                   | 2007                           | 1                        | 773                         | 0.008587915     |
| 16 | miRecords                              | 2009                           | 1                        | 425                         | 0.007668183     |
| 17 | Bowtie                                 | 2009                           | 1                        | 5963                        | 0.006281352     |
| 18 | fRNadb                                 | 2009                           | 2                        | 118                         | 0.005872451     |
| 19 | targetrank                             | 2007                           | 1                        | 136                         | 0.00576245      |
| 20 | NONCODE                                | 2017                           | 7                        | 380                         | 0.005574897     |
| 21 | miRTarBase                             | 2017                           | 4                        | 690                         | 0.005459824     |
| 22 | miRDB                                  | 2016                           | 5                        | 531                         | 0.005175444     |
| 23 | miR2Disease                            | 2009                           | 1                        | 313                         | 0.004942549     |
| 24 | Transterm                              | 2009                           | 2                        | 44                          | 0.004886343     |
| 25 | TargetFinder                           | 2010                           | 3                        | 920                         | 0.004779548     |
| 26 | miRNAMap                               | 2008                           | 2                        | 160                         | 0.004762509     |
| 27 | SOAP                                   | 2009                           | 2                        | 1688                        | 0.004760001     |
| 28 | RNAxs                                  | 2008                           | 1                        | 88                          | 0.004626129     |
| 29 | EIMMo                                  | 2007                           | 1                        | 128                         | 0.004408388     |
| 30 | starBase                               | 2014                           | 3                        | 415                         | 0.004339678     |
| 31 | RNA22                                  | 2012                           | 2                        | 597                         | 0.004283938     |
| 32 | DIANA-miRGen                           | 2016                           | 3                        | 163                         | 0.004243401     |
| 33 | CMfinder                               | 2006                           | 1                        | 122                         | 0.00406151      |
| 34 | Maq                                    | 2008                           | 1                        | 1112                        | 0.003965889     |
| 35 | miRanalyzer                            | 2011                           | 2                        | 182                         | 0.003811111     |
| 36 | RNadb                                  | 2007                           | 2                        | 116                         | 0.003310314     |
| 37 | miRGator                               | 2013                           | 3                        | 115                         | 0.00315828      |
| 38 | miRTRAP                                | 2010                           | 1                        | 34                          | 0.003139734     |
| 39 | ExoCarta                               | 2016                           | 4                        | 441                         | 0.002996071     |
| 40 | HMDD                                   | 2014                           | 2                        | 296                         | 0.002764065     |
| 41 | SEQanswers                             | 2012                           | 2                        | 33                          | 0.002691003     |

|    | <b>Tool Name</b>                       | <b>Latest Publication Year</b> | <b>Publication Count</b> | <b>Total Citation Count</b> | <b>Pagerank</b> |
|----|----------------------------------------|--------------------------------|--------------------------|-----------------------------|-----------------|
| 42 | PED                                    | 2014                           | 3                        | 26                          | 0.002691003     |
| 43 | MicroInspector                         | 2005                           | 1                        | 82                          | 0.002649019     |
| 44 | miRU                                   | 2005                           | 1                        | 108                         | 0.002626547     |
| 45 | mirWIP                                 | 2008                           | 1                        | 94                          | 0.002537777     |
| 46 | DIANA-miRPath                          | 2015                           | 3                        | 404                         | 0.002535797     |
| 47 | MPSS                                   | 2007                           | 4                        | 286                         | 0.002461332     |
| 48 | cre-siRNA                              | 2007                           | 1                        | 150                         | 0.002317134     |
| 49 | Bioinformatics Links Directory         | 2012                           | 8                        | 47                          | 0.002251127     |
| 50 | g:Profiler                             | 2016                           | 3                        | 438                         | 0.002175425     |
| 51 | Argonaute                              | 2006                           | 1                        | 26                          | 0.001997396     |
| 52 | BWA                                    | 2009                           | 1                        | 6788                        | 0.001978977     |
| 53 | RNAmicro                               | 2006                           | 1                        | 58                          | 0.00194199      |
| 54 | maizeGDB                               | 2016                           | 4                        | 109                         | 0.001888423     |
| 55 | AHD                                    | 2011                           | 2                        | 29                          | 0.001888423     |
| 56 | MIMAS                                  | 2009                           | 2                        | 18                          | 0.001888423     |
| 57 | Laminin database                       | 2014                           | 2                        | 4                           | 0.001888423     |
| 58 | RNAstructure                           | 2016                           | 3                        | 318                         | 0.001838462     |
| 59 | siSearch                               | 2004                           | 1                        | 36                          | 0.001814969     |
| 60 | DIANA-LncBase                          | 2016                           | 2                        | 80                          | 0.001790259     |
| 61 | DoRiNA                                 | 2015                           | 2                        | 84                          | 0.00176238      |
| 62 | RNAplex                                | 2008                           | 1                        | 60                          | 0.0017502       |
| 63 | ASRP                                   | 2008                           | 2                        | 122                         | 0.001746261     |
| 64 | ProMiR                                 | 2006                           | 2                        | 75                          | 0.00171845      |
| 65 | siDirect                               | 2009                           | 3                        | 96                          | 0.001704682     |
| 66 | MicroTar                               | 2006                           | 1                        | 25                          | 0.001701849     |
| 67 | Arabidopsis Small RNA Project Database | 2004                           | 1                        | 124                         | 0.001688477     |
| 68 | mirclust                               | 2009                           | 1                        | 20                          | 0.001688429     |
| 69 | TransmiR                               | 2010                           | 1                        | 130                         | 0.001608815     |
| 70 | MIRZA                                  | 2013                           | 1                        | 46                          | 0.001579812     |
| 71 | SnoReport                              | 2008                           | 1                        | 52                          | 0.001570705     |
| 72 | MIReNA                                 | 2010                           | 1                        | 48                          | 0.001566749     |
| 73 | miRWalk                                | 2015                           | 2                        | 588                         | 0.001527003     |
| 74 | NPInter                                | 2016                           | 3                        | 46                          | 0.001517613     |
| 75 | mirnasvm                               | 2005                           | 1                        | 129                         | 0.001475457     |
| 76 | TargetSpy                              | 2010                           | 1                        | 43                          | 0.00144746      |
| 77 | PolymiRTS                              | 2014                           | 3                        | 142                         | 0.001369436     |
| 78 | psRNATarget                            | 2011                           | 2                        | 403                         | 0.001341475     |
| 79 | deep_sequencing                        | 2010                           | 1                        | 58                          | 0.001295672     |
| 80 | miRNA Precursor Candidates for Arabid  | 2005                           | 1                        | 100                         | 0.001248049     |
| 81 | RegRNA                                 | 2013                           | 2                        | 120                         | 0.001244666     |
| 82 | miRmap                                 | 2013                           | 2                        | 49                          | 0.001239051     |
| 83 | Antar                                  | 2011                           | 1                        | 31                          | 0.00122792      |
| 84 | miRSel                                 | 2010                           | 1                        | 28                          | 0.001226077     |
| 85 | GenMiR++                               | 2007                           | 1                        | 157                         | 0.001219387     |

|     | <b>Tool Name</b>       | <b>Latest Publication Year</b> | <b>Publication Count</b> | <b>Total Citation Count</b> | <b>Pagerank</b> |
|-----|------------------------|--------------------------------|--------------------------|-----------------------------|-----------------|
| 86  | SVMicrO                | 2010                           | 1                        | 24                          | 0.00120173      |
| 87  | MicroMUMMIE            | 2013                           | 1                        | 21                          | 0.001186942     |
| 88  | miPred                 | 2007                           | 1                        | 138                         | 0.001173435     |
| 89  | MIRZA-G                | 2015                           | 1                        | 9                           | 0.001165        |
| 90  | PhenomiR               | 2012                           | 2                        | 74                          | 0.001164489     |
| 91  | mirTools               | 2013                           | 2                        | 63                          | 0.001162393     |
| 92  | Sfold                  | 2014                           | 4                        | 170                         | 0.001148085     |
| 93  | deepBase               | 2016                           | 3                        | 84                          | 0.001107042     |
| 94  | TargetBoost            | 2005                           | 1                        | 31                          | 0.001104575     |
| 95  | MBSTAR                 | 2015                           | 1                        | 1                           | 0.001099235     |
| 96  | siRecords              | 2009                           | 2                        | 24                          | 0.001070848     |
| 97  | siRNA Selection Server | 2004                           | 1                        | 102                         | 0.001057511     |
| 98  | cellHTS                | 2010                           | 2                        | 122                         | 0.001045552     |
| 99  | miRExpress             | 2009                           | 1                        | 75                          | 0.001039989     |
| 100 | GenomeRNAi             | 2013                           | 3                        | 75                          | 0.001038294     |
| 101 | miTarget               | 2006                           | 1                        | 62                          | 0.001018408     |
| 102 | SigTerms               | 2008                           | 1                        | 61                          | 0.001009467     |
| 103 | FlyRNAi                | 2012                           | 2                        | 58                          | 0.001007358     |
| 104 | NBmiRTar               | 2007                           | 1                        | 36                          | 0.000996255     |
| 105 | DEQOR                  | 2004                           | 1                        | 48                          | 0.000995917     |
| 106 | MAGIA                  | 2012                           | 2                        | 83                          | 0.000988181     |
| 107 | MiRAlign               | 2005                           | 1                        | 86                          | 0.000979135     |
| 108 | CircuitsDB             | 2011                           | 2                        | 51                          | 0.000978711     |
| 109 | miR-abela              | 2005                           | 1                        | 85                          | 0.000976439     |
| 110 | LNCipedia              | 2015                           | 3                        | 175                         | 0.000962879     |
| 111 | TSGene                 | 2016                           | 2                        | 139                         | 0.000913818     |
| 112 | IntaRNA                | 2014                           | 2                        | 159                         | 0.000901924     |
| 113 | SeqBuster              | 2016                           | 3                        | 52                          | 0.000893747     |
| 114 | MISIM                  | 2010                           | 1                        | 53                          | 0.000889605     |
| 115 | DIANA-mirExTra         | 2016                           | 2                        | 36                          | 0.000860211     |
| 116 | miRNAkey               | 2010                           | 1                        | 32                          | 0.000851545     |
| 117 | miRNASNP               | 2015                           | 2                        | 99                          | 0.000849481     |
| 118 | GraphWeb               | 2008                           | 1                        | 31                          | 0.000846074     |
| 119 | ChIPBase               | 2017                           | 2                        | 94                          | 0.000842216     |
| 120 | E-RNAi                 | 2010                           | 2                        | 59                          | 0.000841598     |
| 121 | DSAP                   | 2010                           | 1                        | 33                          | 0.000838875     |
| 122 | PARalyzer              | 2011                           | 1                        | 110                         | 0.000836778     |
| 123 | UEA sRNA toolkit       | 2008                           | 1                        | 103                         | 0.000825701     |
| 124 | HuSiDa                 | 2005                           | 1                        | 12                          | 0.000813939     |
| 125 | UCbase & miRfunc       | 2009                           | 1                        | 14                          | 0.000810047     |
| 126 | Vesiclepedia           | 2012                           | 1                        | 197                         | 0.000806872     |
| 127 | MMIA                   | 2009                           | 1                        | 69                          | 0.000790961     |
| 128 | soybean_mirna          | 2010                           | 1                        | 42                          | 0.000787549     |
| 129 | TargetMiner            | 2009                           | 1                        | 59                          | 0.000784288     |

|     | <b>Tool Name</b>                         | <b>Latest Publication Year</b> | <b>Publication Count</b> | <b>Total Citation Count</b> | <b>Pagerank</b> |
|-----|------------------------------------------|--------------------------------|--------------------------|-----------------------------|-----------------|
| 130 | miRCancer                                | 2013                           | 1                        | 57                          | 0.000764878     |
| 131 | De Novo SVM Classification of Precurs    | 2007                           | 1                        | 66                          | 0.000761257     |
| 132 | More complete gene silencing by fewer    | 2007                           | 1                        | 19                          | 0.000757306     |
| 133 | PASS                                     | 2013                           | 2                        | 55                          | 0.000743925     |
| 134 | PMRD                                     | 2010                           | 1                        | 82                          | 0.000738349     |
| 135 | DSIR                                     | 2006                           | 1                        | 79                          | 0.000726603     |
| 136 | CluePedia                                | 2013                           | 1                        | 81                          | 0.000721852     |
| 137 | piRNABank                                | 2008                           | 1                        | 91                          | 0.000721574     |
| 138 | miRo                                     | 2009                           | 1                        | 40                          | 0.000721507     |
| 139 | Reliable prediction of Droscha processin | 2007                           | 1                        | 36                          | 0.000708475     |
| 140 | FAME                                     | 2010                           | 1                        | 35                          | 0.000708227     |
| 141 | BayesMiRNAfind                           | 2006                           | 1                        | 47                          | 0.000708184     |
| 142 | dbDEMC                                   | 2017                           | 2                        | 33                          | 0.000707678     |
| 143 | GeneSet2miRNA                            | 2009                           | 1                        | 21                          | 0.000706703     |
| 144 | miREnvironment                           | 2011                           | 1                        | 20                          | 0.000706582     |
| 145 | MicroSNiPer                              | 2010                           | 1                        | 44                          | 0.00070542      |
| 146 | microPred                                | 2009                           | 1                        | 58                          | 0.000704678     |
| 147 | SoyKB                                    | 2014                           | 2                        | 38                          | 0.000690411     |
| 148 | miRNA Body Map                           | 2011                           | 1                        | 36                          | 0.000687399     |
| 149 | segemehl                                 | 2009                           | 1                        | 155                         | 0.000676793     |
| 150 | HLungDB                                  | 2010                           | 1                        | 18                          | 0.00067407      |
| 151 | Patrocles                                | 2010                           | 2                        | 71                          | 0.000667189     |
| 152 | GenScript                                | 2004                           | 1                        | 20                          | 0.000662786     |
| 153 | CORNA                                    | 2009                           | 1                        | 27                          | 0.000656839     |
| 154 | miRNA SNiPer                             | 2013                           | 2                        | 26                          | 0.000655527     |
| 155 | SNMNMF                                   | 2011                           | 1                        | 54                          | 0.000652679     |
| 156 | miRDeep*                                 | 2013                           | 1                        | 37                          | 0.00065049      |
| 157 | Web MicroRNA Designer                    | 2008                           | 2                        | 400                         | 0.000646746     |
| 158 | miRNApath                                | 2007                           | 1                        | 12                          | 0.000638202     |
| 159 | Empirical GO                             | 2015                           | 1                        | 23                          | 0.000636709     |
| 160 | mirConnX                                 | 2011                           | 1                        | 50                          | 0.000635805     |
| 161 | Signalink                                | 2013                           | 2                        | 56                          | 0.000634849     |
| 162 | siDRM                                    | 2008                           | 1                        | 10                          | 0.000631567     |
| 163 | RNAither                                 | 2009                           | 1                        | 26                          | 0.00062583      |
| 164 | PatMaN                                   | 2008                           | 1                        | 64                          | 0.000623703     |
| 165 | SHRiMP                                   | 2011                           | 2                        | 312                         | 0.000621496     |
| 166 | FLIGHT                                   | 2010                           | 2                        | 20                          | 0.000619414     |
| 167 | miRGate                                  | 2017                           | 2                        | 10                          | 0.000611582     |
| 168 | Tomato Functional Genomics Database      | 2011                           | 2                        | 59                          | 0.000611133     |
| 169 | smiRNA-annotation                        | 2008                           | 1                        | 35                          | 0.000610271     |
| 170 | SM2miR                                   | 2013                           | 1                        | 23                          | 0.000609333     |
| 171 | GeneCodis                                | 2012                           | 3                        | 350                         | 0.000606004     |
| 172 | dChip-GemiNI                             | 2012                           | 1                        | 28                          | 0.000605639     |
| 173 | YM500                                    | 2017                           | 3                        | 30                          | 0.000603978     |

|     | <b>Tool Name</b>       | <b>Latest Publication Year</b> | <b>Publication Count</b> | <b>Total Citation Count</b> | <b>Pagerank</b> |
|-----|------------------------|--------------------------------|--------------------------|-----------------------------|-----------------|
| 174 | TAM                    | 2010                           | 1                        | 44                          | 0.000603856     |
| 175 | DARIO                  | 2011                           | 1                        | 22                          | 0.000601502     |
| 176 | miTALOS                | 2016                           | 2                        | 20                          | 0.000593454     |
| 177 | sIR                    | 2007                           | 1                        | 10                          | 0.000592642     |
| 178 | SiteSifter             | 2010                           | 2                        | 232                         | 0.000592613     |
| 179 | SomamiR                | 2016                           | 2                        | 23                          | 0.00058454      |
| 180 | OligoWalk              | 2010                           | 2                        | 21                          | 0.000583841     |
| 181 | omiRas                 | 2013                           | 1                        | 22                          | 0.000579709     |
| 182 | ShortStack             | 2016                           | 2                        | 44                          | 0.000572995     |
| 183 | MiRPara                | 2011                           | 1                        | 38                          | 0.000572647     |
| 184 | miRTar                 | 2011                           | 1                        | 29                          | 0.000572175     |
| 185 | miRDeep-P              | 2011                           | 1                        | 59                          | 0.000570326     |
| 186 | miR2Subpath            | 2012                           | 1                        | 15                          | 0.000569869     |
| 187 | Chipster               | 2011                           | 1                        | 70                          | 0.000568708     |
| 188 | FunRich                | 2015                           | 2                        | 70                          | 0.000566226     |
| 189 | EVpedia                | 2015                           | 2                        | 49                          | 0.000566226     |
| 190 | ncRNADB                | 2007                           | 1                        | 18                          | 0.000563696     |
| 191 | CPSS                   | 2017                           | 2                        | 15                          | 0.000561484     |
| 192 | miRCode                | 2012                           | 1                        | 70                          | 0.000557047     |
| 193 | TSmiR                  | 2014                           | 1                        | 28                          | 0.000548678     |
| 194 | CleaveLand             | 2009                           | 1                        | 129                         | 0.000544202     |
| 195 | CAP-miRSeq             | 2014                           | 1                        | 26                          | 0.000543651     |
| 196 | MeT-DB                 | 2015                           | 1                        | 8                           | 0.00054276      |
| 197 | NCG                    | 2016                           | 5                        | 84                          | 0.000541362     |
| 198 | lncRNASNP              | 2017                           | 2                        | 28                          | 0.000541141     |
| 199 | isomiRex               | 2013                           | 1                        | 12                          | 0.000540228     |
| 200 | Database of isomirs    | 2010                           | 1                        | 108                         | 0.000534273     |
| 201 | The UEA sRNA workbench | 2017                           | 3                        | 77                          | 0.000532513     |
| 202 | siRNA Design Software  | 2005                           | 1                        | 18                          | 0.000529079     |
| 203 | siRNARules             | 2006                           | 1                        | 11                          | 0.000529053     |
| 204 | TAPIR                  | 2010                           | 1                        | 53                          | 0.000527526     |
| 205 | miRdSNP                | 2012                           | 1                        | 43                          | 0.0005263       |
| 206 | BioProfiling           | 2011                           | 1                        | 42                          | 0.000524037     |
| 207 | BreastMark             | 2013                           | 1                        | 35                          | 0.000524037     |
| 208 | PAGED                  | 2012                           | 1                        | 8                           | 0.000524037     |
| 209 | HCS-Analyzer           | 2012                           | 1                        | 4                           | 0.000524037     |
| 210 | GeneSeer               | 2005                           | 1                        | 4                           | 0.000524037     |
| 211 | MirSNP                 | 2012                           | 1                        | 59                          | 0.000519271     |
| 212 | CID-miRNA              | 2008                           | 1                        | 22                          | 0.000514626     |
| 213 | mirDIP                 | 2017                           | 2                        | 67                          | 0.000509238     |
| 214 | NEXT-RNAi              | 2010                           | 1                        | 24                          | 0.000508754     |
| 215 | CSRDB                  | 2007                           | 1                        | 39                          | 0.000505944     |
| 216 | MIR@NT@N               | 2011                           | 1                        | 28                          | 0.000503715     |
| 217 | miRNAMiner             | 2008                           | 1                        | 21                          | 0.000502975     |

|     | <b>Tool Name</b>                     | <b>Latest Publication Year</b> | <b>Publication Count</b> | <b>Total Citation Count</b> | <b>Pagerank</b> |
|-----|--------------------------------------|--------------------------------|--------------------------|-----------------------------|-----------------|
| 218 | PNRD                                 | 2015                           | 1                        | 22                          | 0.000501294     |
| 219 | MGD/MGI                              | 2015                           | 3                        | 175                         | 0.000499066     |
| 220 | TFmiR                                | 2015                           | 1                        | 13                          | 0.000498972     |
| 221 | miRNEST                              | 2014                           | 2                        | 18                          | 0.000496747     |
| 222 | mirEX                                | 2015                           | 2                        | 17                          | 0.000494229     |
| 223 | RCoS                                 | 2009                           | 1                        | 68                          | 0.000493513     |
| 224 | LSD                                  | 2014                           | 2                        | 20                          | 0.000492632     |
| 225 | piRNA                                | 2009                           | 1                        | 22                          | 0.000490513     |
| 226 | MiRFinder                            | 2007                           | 1                        | 29                          | 0.000487883     |
| 227 | PIPmiR                               | 2012                           | 1                        | 38                          | 0.000486004     |
| 228 | LoessM                               | 2009                           | 1                        | 21                          | 0.000483908     |
| 229 | A personalized microRNA microarray n | 2010                           | 1                        | 11                          | 0.000483908     |
| 230 | Linc2GO                              | 2013                           | 1                        | 25                          | 0.000480391     |
| 231 | miREval                              | 2013                           | 2                        | 20                          | 0.000477344     |
| 232 | RNAiDB                               | 2004                           | 1                        | 29                          | 0.000477121     |
| 233 | Oasis                                | 2015                           | 1                        | 8                           | 0.000475309     |
| 234 | miRror-Suite                         | 2014                           | 4                        | 28                          | 0.000470209     |
| 235 | Lasso_miR                            | 2011                           | 1                        | 37                          | 0.000468949     |
| 236 | AgiMicroRna                          | 2011                           | 1                        | 50                          | 0.000466699     |
| 237 | VIRmiRNA                             | 2014                           | 1                        | 13                          | 0.000466041     |
| 238 | mirna-corpora                        | 2014                           | 1                        | 8                           | 0.000457562     |
| 239 | sRNAtoolbox                          | 2015                           | 1                        | 29                          | 0.000457294     |
| 240 | wapRNA                               | 2011                           | 1                        | 20                          | 0.000456305     |
| 241 | BRB-ArrayTools                       | 2008                           | 1                        | 22                          | 0.000454873     |
| 242 | MatureBayes                          | 2010                           | 1                        | 26                          | 0.000453057     |
| 243 | miTEA                                | 2013                           | 1                        | 15                          | 0.000452401     |
| 244 | Chimira                              | 2015                           | 1                        | 11                          | 0.000451964     |
| 245 | PETfold & PETcofold                  | 2011                           | 4                        | 49                          | 0.000449843     |
| 246 | miRTarCLIP                           | 2013                           | 1                        | 16                          | 0.000449616     |
| 247 | IsomiRage                            | 2014                           | 1                        | 15                          | 0.000448462     |
| 248 | CoMeTa                               | 2012                           | 1                        | 57                          | 0.000447326     |
| 249 | deepBlockAlign                       | 2012                           | 1                        | 9                           | 0.000447308     |
| 250 | miROrtho                             | 2009                           | 1                        | 30                          | 0.000446916     |
| 251 | miRBase Tracker                      | 2014                           | 1                        | 27                          | 0.000445339     |
| 252 | CancerMiner                          | 2013                           | 1                        | 51                          | 0.00044505      |
| 253 | TargetRNA                            | 2014                           | 2                        | 82                          | 0.0004447       |
| 254 | miren                                | 2012                           | 1                        | 18                          | 0.000443934     |
| 255 | workflow of integrating mRNA and miF | 2011                           | 1                        | 12                          | 0.000443779     |
| 256 | miRSystem                            | 2012                           | 1                        | 52                          | 0.000443637     |
| 257 | siDesign                             | 2009                           | 1                        | 20                          | 0.000443251     |
| 258 | miRvar                               | 2011                           | 1                        | 11                          | 0.000440301     |
| 259 | miRDeathDB                           | 2012                           | 1                        | 7                           | 0.000440143     |
| 260 | miRge                                | 2015                           | 1                        | 9                           | 0.000439766     |
| 261 | MirZ                                 | 2009                           | 1                        | 35                          | 0.000439099     |

|     | <b>Tool Name</b>                         | <b>Latest Publication Year</b> | <b>Publication Count</b> | <b>Total Citation Count</b> | <b>Pagerank</b> |
|-----|------------------------------------------|--------------------------------|--------------------------|-----------------------------|-----------------|
| 262 | PhaseTank                                | 2015                           | 1                        | 4                           | 0.000438047     |
| 263 | SyStemCell                               | 2012                           | 1                        | 4                           | 0.00043776      |
| 264 | SiDE                                     | 2005                           | 1                        | 10                          | 0.000435231     |
| 265 | SoymiRNet                                | 2014                           | 1                        | 11                          | 0.000434222     |
| 266 | OncomiRDB                                | 2014                           | 1                        | 20                          | 0.000433273     |
| 267 | MIREAP                                   | 2015                           | 2                        | 27                          | 0.000432765     |
| 268 | HHMMiR                                   | 2009                           | 1                        | 25                          | 0.000430832     |
| 269 | rice_build                               | 2008                           | 1                        | 119                         | 0.000430322     |
| 270 | HDMP                                     | 2013                           | 1                        | 30                          | 0.000430067     |
| 271 | miRRim                                   | 2007                           | 1                        | 23                          | 0.000428328     |
| 272 | HOCTARdb                                 | 2011                           | 1                        | 17                          | 0.000427682     |
| 273 | PROmiRNA                                 | 2013                           | 1                        | 23                          | 0.000425265     |
| 274 | FatiGO +                                 | 2007                           | 1                        | 104                         | 0.000423575     |
| 275 | miRDeepFinder                            | 2012                           | 1                        | 102                         | 0.000423362     |
| 276 | iMir                                     | 2013                           | 1                        | 16                          | 0.000423233     |
| 277 | microHARVESTER                           | 2006                           | 1                        | 34                          | 0.00042148      |
| 278 | PuTmiR                                   | 2010                           | 1                        | 15                          | 0.000420842     |
| 279 | multiMiR                                 | 2014                           | 1                        | 25                          | 0.00042084      |
| 280 | miRandola                                | 2017                           | 3                        | 55                          | 0.000416693     |
| 281 | CRSD                                     | 2006                           | 1                        | 22                          | 0.000411676     |
| 282 | microTSS                                 | 2014                           | 1                        | 14                          | 0.000408983     |
| 283 | mirAct                                   | 2011                           | 1                        | 11                          | 0.000406861     |
| 284 | dsCheck                                  | 2005                           | 1                        | 36                          | 0.000405585     |
| 285 | miRNAFold                                | 2016                           | 2                        | 12                          | 0.0004051       |
| 286 | isomiRID                                 | 2013                           | 1                        | 7                           | 0.000404174     |
| 287 | AsiDesigner                              | 2010                           | 2                        | 6                           | 0.000404012     |
| 288 | SpecificityServer                        | 2008                           | 1                        | 6                           | 0.000404012     |
| 289 | Database of cattle candidate genes and g | 2009                           | 1                        | 29                          | 0.00040365      |
| 290 | NetAge                                   | 2010                           | 1                        | 22                          | 0.00040365      |
| 291 | MonarchBase                              | 2013                           | 1                        | 20                          | 0.00040365      |
| 292 | sMBPLS                                   | 2012                           | 1                        | 20                          | 0.00040365      |
| 293 | PASmiR                                   | 2013                           | 1                        | 11                          | 0.00040365      |
| 294 | PHDcleav                                 | 2013                           | 1                        | 9                           | 0.00040365      |
| 295 | RNA-CODE                                 | 2013                           | 1                        | 4                           | 0.00040365      |
| 296 | miRiadne                                 | 2015                           | 1                        | 1                           | 0.00040365      |
| 297 | TMREC                                    | 2015                           | 1                        | 3                           | 0.0004025       |
| 298 | ComiR                                    | 2013                           | 2                        | 48                          | 0.000401329     |
| 299 | AthaMap                                  | 2014                           | 3                        | 39                          | 0.000400551     |
| 300 | REA                                      | 2013                           | 1                        | 4                           | 0.000400006     |
| 301 | PmmR                                     | 2011                           | 1                        | 5                           | 0.00039931      |
| 302 | miRFANs                                  | 2012                           | 1                        | 4                           | 0.000399049     |
| 303 | SMiR-NBI                                 | 2016                           | 2                        | 112                         | 0.000398944     |
| 304 | miRNA timeline                           | 2012                           | 1                        | 19                          | 0.000397253     |
| 305 | mirPub                                   | 2015                           | 1                        | 4                           | 0.000396707     |

|     | <b>Tool Name</b>                         | <b>Latest Publication Year</b> | <b>Publication Count</b> | <b>Total Citation Count</b> | <b>Pagerank</b> |
|-----|------------------------------------------|--------------------------------|--------------------------|-----------------------------|-----------------|
| 306 | mimiRNA                                  | 2010                           | 1                        | 29                          | 0.000396665     |
| 307 | STarMir                                  | 2016                           | 2                        | 18                          | 0.000396556     |
| 308 | FANTOM4 EdgeExpressDB                    | 2009                           | 1                        | 28                          | 0.000395122     |
| 309 | UTRdb and UTRsite                        | 2010                           | 1                        | 97                          | 0.000394795     |
| 310 | SSCprofiler                              | 2009                           | 1                        | 19                          | 0.00039193      |
| 311 | TissueAtlas                              | 2016                           | 2                        | 35                          | 0.000391011     |
| 312 | miRHrt                                   | 2010                           | 1                        | 9                           | 0.000389889     |
| 313 | Target-align                             | 2010                           | 1                        | 21                          | 0.000387541     |
| 314 | shortran                                 | 2012                           | 1                        | 5                           | 0.000385979     |
| 315 | MiClip                                   | 2014                           | 1                        | 8                           | 0.000385592     |
| 316 | SAVoR                                    | 2012                           | 1                        | 7                           | 0.000383564     |
| 317 | Revealing posttranscriptional regulatory | 2005                           | 1                        | 36                          | 0.000383089     |
| 318 | miRSponge                                | 2015                           | 1                        | 11                          | 0.000382735     |
| 319 | PmiRKB                                   | 2011                           | 1                        | 13                          | 0.000382476     |
| 320 | TALASSO                                  | 2012                           | 1                        | 19                          | 0.000382064     |
| 321 | mrSNP                                    | 2014                           | 1                        | 14                          | 0.000380481     |
| 322 | MaturePred                               | 2011                           | 1                        | 17                          | 0.000380053     |
| 323 | CoRAL                                    | 2014                           | 2                        | 9                           | 0.000378401     |
| 324 | SFGD                                     | 2014                           | 1                        | 10                          | 0.000377853     |
| 325 | GraP                                     | 2015                           | 1                        | 5                           | 0.000377853     |
| 326 | DisTMGneT                                | 2013                           | 1                        | 9                           | 0.000377159     |
| 327 | MiRdup                                   | 2013                           | 1                        | 11                          | 0.000376924     |
| 328 | RIsearch                                 | 2012                           | 1                        | 20                          | 0.000375365     |
| 329 | mirsnpscore                              | 2011                           | 1                        | 25                          | 0.000375039     |
| 330 | TargetScore                              | 2014                           | 1                        | 7                           | 0.000374574     |
| 331 | mirMark                                  | 2014                           | 1                        | 6                           | 0.000373506     |
| 332 | siRNadb                                  | 2005                           | 1                        | 13                          | 0.000373267     |
| 333 | FlaiMapper                               | 2015                           | 1                        | 5                           | 0.000373239     |
| 334 | miRtest                                  | 2012                           | 1                        | 10                          | 0.000373212     |
| 335 | miRT                                     | 2012                           | 1                        | 8                           | 0.000373065     |
| 336 | miR-host                                 | 2013                           | 1                        | 20                          | 0.000371926     |
| 337 | dbSMR                                    | 2009                           | 1                        | 21                          | 0.000370489     |
| 338 | PlantMiRNAPred                           | 2011                           | 1                        | 18                          | 0.000369768     |
| 339 | HuntMi                                   | 2013                           | 1                        | 12                          | 0.000369742     |
| 340 | ceRDB                                    | 2012                           | 1                        | 22                          | 0.000369708     |
| 341 | miRPD                                    | 2014                           | 1                        | 20                          | 0.000369605     |
| 342 | ppt-miRBase                              | 2011                           | 1                        | 7                           | 0.000369039     |
| 343 | ExprTargetDB                             | 2010                           | 1                        | 38                          | 0.00036871      |
| 344 | RNAcentral                               | 2017                           | 3                        | 49                          | 0.000366762     |
| 345 | rSNPBase                                 | 2014                           | 1                        | 23                          | 0.000365608     |
| 346 | CoGemiR                                  | 2008                           | 1                        | 11                          | 0.000364015     |
| 347 | CellMiner                                | 2012                           | 1                        | 104                         | 0.000363521     |
| 348 | MTide                                    | 2015                           | 1                        | 11                          | 0.000363521     |
| 349 | KUPKB                                    | 2012                           | 1                        | 9                           | 0.000363521     |



|     | <b>Tool Name</b>                      | <b>Latest Publication Year</b> | <b>Publication Count</b> | <b>Total Citation Count</b> | <b>Pagerank</b> |
|-----|---------------------------------------|--------------------------------|--------------------------|-----------------------------|-----------------|
| 350 | DAS                                   | 2005                           | 1                        | 5                           | 0.000363521     |
| 351 | RPdb                                  | 2015                           | 1                        | 1                           | 0.000363521     |
| 352 | miSolRNA                              | 2010                           | 1                        | 1                           | 0.000363521     |
| 353 | ISRNA                                 | 2014                           | 1                        | 5                           | 0.000362538     |
| 354 | miRNACon                              | 2014                           | 1                        | 19                          | 0.000361549     |
| 355 | SylArray                              | 2010                           | 1                        | 18                          | 0.000361212     |
| 356 | MiRmat                                | 2012                           | 1                        | 7                           | 0.000360796     |
| 357 | miR-BAG                               | 2012                           | 1                        | 4                           | 0.000359673     |
| 358 | ISMARA                                | 2014                           | 1                        | 43                          | 0.000359437     |
| 359 | SeedSeq                               | 2013                           | 1                        | 1                           | 0.000359437     |
| 360 | ExcellmiRDB                           | 2015                           | 1                        | 1                           | 0.000359343     |
| 361 | MiRank                                | 2008                           | 1                        | 21                          | 0.000359282     |
| 362 | MAGI                                  | 2014                           | 1                        | 5                           | 0.000359198     |
| 363 | SeqTrimMap                            | 2012                           | 1                        | 11                          | 0.00035878      |
| 364 | Pharmaco-miRs                         | 2014                           | 1                        | 20                          | 0.000358667     |
| 365 | miRTex                                | 2015                           | 1                        | 7                           | 0.000358657     |
| 366 | miRTrail                              | 2012                           | 1                        | 12                          | 0.000358642     |
| 367 | self-containment index calculation    | 2008                           | 1                        | 10                          | 0.000356837     |
| 368 | miRegulome                            | 2015                           | 1                        | 4                           | 0.000356233     |
| 369 | MirGeneDB                             | 2015                           | 1                        | 30                          | 0.000356069     |
| 370 | PEMDAM                                | 2014                           | 1                        | 8                           | 0.000355747     |
| 371 | sPARTA                                | 2014                           | 1                        | 11                          | 0.000355621     |
| 372 | PAREsnip                              | 2012                           | 1                        | 30                          | 0.000355036     |
| 373 | miREvo                                | 2012                           | 1                        | 37                          | 0.000354504     |
| 374 | miRIAD                                | 2017                           | 2                        | 15                          | 0.000354099     |
| 375 | mRTP                                  | 2007                           | 1                        | 13                          | 0.000353893     |
| 376 | A combinatorial approach to determine | 2009                           | 1                        | 2                           | 0.000352326     |
| 377 | PACCMIT/PACCMIT-CDS                   | 2015                           | 2                        | 8                           | 0.000350968     |
| 378 | miRiam                                | 2010                           | 1                        | 15                          | 0.000350197     |
| 379 | cWords                                | 2013                           | 1                        | 6                           | 0.000350145     |
| 380 | Circ2Traits                           | 2013                           | 1                        | 41                          | 0.00035008      |
| 381 | GAMUT                                 | 2014                           | 1                        | 4                           | 0.00034972      |
| 382 | miRMAP (Visualization)                | 2014                           | 1                        | 7                           | 0.000348829     |
| 383 | E-miR                                 | 2010                           | 1                        | 32                          | 0.000348503     |
| 384 | Vir-Mir db                            | 2008                           | 1                        | 25                          | 0.00034773      |
| 385 | microTranspoGene                      | 2008                           | 1                        | 33                          | 0.000346618     |
| 386 | MicroPC                               | 2009                           | 1                        | 9                           | 0.000346615     |
| 387 | dPORE                                 | 2011                           | 1                        | 13                          | 0.000346475     |
| 388 | CCDB                                  | 2011                           | 1                        | 20                          | 0.000346467     |
| 389 | miRMaid                               | 2010                           | 1                        | 6                           | 0.000346312     |
| 390 | SoMART                                | 2012                           | 1                        | 22                          | 0.000346158     |
| 391 | AltAnalyze and DomainGraph            | 2010                           | 1                        | 86                          | 0.000343457     |
| 392 | RFRCDDB-siRNA                         | 2007                           | 1                        | 12                          | 0.000343457     |
| 393 | miRspring                             | 2013                           | 1                        | 7                           | 0.000343292     |

| Tool Name | Latest Publication Year | Publication Count | Total Citation Count | Pagerank |             |
|-----------|-------------------------|-------------------|----------------------|----------|-------------|
| 394       | miRFam                  | 2011              | 1                    | 9        | 0.000342884 |
| 395       | ncRNAimprint            | 2010              | 1                    | 14       | 0.000342782 |
| 396       | BioVLAB-MMIA-NGS        | 2015              | 1                    | 5        | 0.000342565 |
| 397       | PsRobot                 | 2012              | 1                    | 55       | 0.000341795 |
| 398       | Xenbase                 | 2015              | 2                    | 46       | 0.000341281 |
| 399       | tasiRNadb               | 2014              | 1                    | 7        | 0.000340922 |
| 400       | RISCbinder              | 2009              | 1                    | 14       | 0.000340447 |
| 401       | MapMi                   | 2010              | 1                    | 22       | 0.000340331 |
| 402       | targetHub               | 2013              | 1                    | 4        | 0.000340113 |
| 403       | cGRNB                   | 2013              | 1                    | 4        | 0.000340061 |
| 404       | MIDP                    | 2015              | 1                    | 10       | 0.000339618 |
| 405       | CMP                     | 2011              | 1                    | 10       | 0.00033775  |
| 406       | SmiRN-AD                | 2014              | 1                    | 7        | 0.000337183 |
| 407       | Mirsynergy              | 2014              | 1                    | 13       | 0.000336961 |
| 408       | M@IA                    | 2008              | 1                    | 4        | 0.000336783 |
| 409       | APADB                   | 2014              | 1                    | 11       | 0.000336618 |
| 410       | novoMiRank              | 2016              | 1                    | 7        | 0.000336578 |
| 411       | miR-isomiRExp           | 2016              | 1                    | 10       | 0.00033564  |
| 412       | MultiMiTar              | 2011              | 1                    | 11       | 0.000335252 |
| 413       | MIRPIPE                 | 2014              | 1                    | 6        | 0.000335249 |
| 414       | DeAnnIso                | 2016              | 1                    | 3        | 0.000335249 |
| 415       | HMED                    | 2014              | 1                    | 8        | 0.000335112 |
| 416       | LncRBase                | 2014              | 1                    | 7        | 0.000334975 |
| 417       | ViTa                    | 2007              | 1                    | 28       | 0.000334111 |
| 418       | miR2GO                  | 2015              | 1                    | 5        | 0.000332541 |
| 419       | NorahDesk               | 2012              | 1                    | 4        | 0.000332334 |
| 420       | RKNNMDA                 | 2017              | 1                    | 8        | 0.000331905 |
| 421       | microPIR                | 2014              | 2                    | 15       | 0.00033153  |
| 422       | RNAimmuno               | 2012              | 1                    | 11       | 0.000331418 |
| 423       | DualTargeting           | 2010              | 1                    | 7        | 0.000331418 |
| 424       | RPASuite                | 2015              | 1                    | 5        | 0.000331418 |
| 425       | AtmiRNET                | 2015              | 1                    | 5        | 0.000331418 |
| 426       | BlockClust              | 2014              | 1                    | 4        | 0.000331418 |
| 427       | miRPlant                | 2014              | 1                    | 13       | 0.000330081 |
| 428       | S-MED                   | 2010              | 1                    | 31       | 0.000329971 |
| 429       | TUMIR                   | 2013              | 1                    | 3        | 0.000329971 |
| 430       | vHoT                    | 2012              | 1                    | 6        | 0.000328022 |
| 431       | HeteroMirPred           | 2013              | 1                    | 11       | 0.000327719 |
| 432       | NOVOMIR                 | 2010              | 1                    | 5        | 0.000327338 |
| 433       | mrsFAST                 | 2014              | 2                    | 114      | 0.000327314 |
| 434       | miRNA-regulome          | 2015              | 1                    | 3        | 0.000327182 |
| 435       | p-TAREF                 | 2011              | 1                    | 7        | 0.000326801 |
| 436       | Discriminant            | 2014              | 1                    | 8        | 0.000326545 |
| 437       | MiRonTop                | 2010              | 1                    | 18       | 0.000326401 |

|     | <b>Tool Name</b>                      | <b>Latest Publication Year</b> | <b>Publication Count</b> | <b>Total Citation Count</b> | <b>Pagerank</b> |
|-----|---------------------------------------|--------------------------------|--------------------------|-----------------------------|-----------------|
| 438 | tfmirloop                             | 2012                           | 1                        | 7                           | 0.000325951     |
| 439 | PMTED                                 | 2013                           | 1                        | 7                           | 0.000325873     |
| 440 | TAREF                                 | 2010                           | 1                        | 10                          | 0.000325658     |
| 441 | eRNA                                  | 2014                           | 1                        | 8                           | 0.000325546     |
| 442 | mdgsa                                 | 2016                           | 1                        | 4                           | 0.000325399     |
| 443 | ViRBase                               | 2015                           | 1                        | 19                          | 0.000325064     |
| 444 | TargetCompare                         | 2014                           | 1                        | 3                           | 0.000324611     |
| 445 | Pan-ceRNADB                           | 2015                           | 1                        | 16                          | 0.000323554     |
| 446 | Cupid                                 | 2015                           | 1                        | 14                          | 0.000323554     |
| 447 | GREENC                                | 2016                           | 1                        | 12                          | 0.000323392     |
| 448 | CANTATAdb                             | 2016                           | 1                        | 7                           | 0.000323392     |
| 449 | MVDA                                  | 2015                           | 1                        | 4                           | 0.000323392     |
| 450 | miRLAB                                | 2015                           | 1                        | 4                           | 0.000323392     |
| 451 | miRiaD (Text Mining Tool)             | 2016                           | 1                        | 2                           | 0.000323392     |
| 452 | MiRTif                                | 2008                           | 1                        | 21                          | 0.00032251      |
| 453 | mirnaTA                               | 2014                           | 1                        | 3                           | 0.000322414     |
| 454 | PMirP                                 | 2010                           | 1                        | 9                           | 0.000321311     |
| 455 | Small RNA Workbench                   | 2013                           | 1                        | 7                           | 0.000320983     |
| 456 | miR-PREFeR                            | 2014                           | 1                        | 11                          | 0.000320908     |
| 457 | miReader                              | 2013                           | 1                        | 6                           | 0.000320526     |
| 458 | CyTargetLinker                        | 2013                           | 1                        | 20                          | 0.000320485     |
| 459 | SITPR                                 | 2014                           | 1                        | 10                          | 0.000320485     |
| 460 | miRvestigator                         | 2011                           | 1                        | 15                          | 0.000320473     |
| 461 | rip                                   | 2010                           | 1                        | 10                          | 0.000319679     |
| 462 | MIPS PlantsDB                         | 2013                           | 2                        | 66                          | 0.00031766      |
| 463 | Comparative Sequencing of Plant Small | 2014                           | 2                        | 42                          | 0.00031766      |
| 464 | Lists2Networks                        | 2010                           | 1                        | 25                          | 0.00031766      |
| 465 | BraMRs                                | 2012                           | 1                        | 14                          | 0.00031766      |
| 466 | piRNA cluster database                | 2016                           | 1                        | 7                           | 0.00031766      |
| 467 | HPVbase                               | 2015                           | 1                        | 6                           | 0.00031766      |
| 468 | siRNAmold                             | 2016                           | 1                        | 5                           | 0.00031766      |
| 469 | CHNmiRD                               | 2016                           | 1                        | 5                           | 0.00031766      |
| 470 | DISMIRA                               | 2015                           | 1                        | 3                           | 0.00031766      |
| 471 | recit                                 | 2009                           | 1                        | 7                           | 0.000317314     |
| 472 | Psmir                                 | 2016                           | 1                        | 4                           | 0.000317174     |
| 473 | ZooMir                                | 2010                           | 1                        | 20                          | 0.000316892     |
| 474 | miRTarVis                             | 2015                           | 1                        | 3                           | 0.000316499     |
| 475 | lncRNAMap                             | 2014                           | 1                        | 7                           | 0.000316118     |
| 476 | mESADB                                | 2011                           | 1                        | 8                           | 0.000315578     |
| 477 | ncPRO-seq                             | 2012                           | 1                        | 23                          | 0.000315135     |
| 478 | ActMiR                                | 2016                           | 1                        | 6                           | 0.000314923     |
| 479 | mirExplorer                           | 2011                           | 1                        | 9                           | 0.000314463     |
| 480 | microT-ANN                            | 2011                           | 1                        | 5                           | 0.000313977     |
| 481 | InCeDB                                | 2014                           | 1                        | 21                          | 0.00031336      |

|     | <b>Tool Name</b>                | <b>Latest Publication Year</b> | <b>Publication Count</b> | <b>Total Citation Count</b> | <b>Pagerank</b> |
|-----|---------------------------------|--------------------------------|--------------------------|-----------------------------|-----------------|
| 482 | CrossHub                        | 2016                           | 1                        | 6                           | 0.00031336      |
| 483 | rnaanals                        | 2015                           | 2                        | 4                           | 0.00031336      |
| 484 | Avishkar                        | 2015                           | 1                        | 4                           | 0.00031336      |
| 485 | MMiRNA-Tar                      | 2015                           | 1                        | 2                           | 0.00031336      |
| 486 | HOCCLUS2                        | 2014                           | 1                        | 10                          | 0.000312705     |
| 487 | GUUGle                          | 2006                           | 1                        | 13                          | 0.000312269     |
| 488 | mirna_target                    | 2010                           | 1                        | 10                          | 0.000312244     |
| 489 | treebic                         | 2011                           | 1                        | 2                           | 0.000310218     |
| 490 | miRA                            | 2015                           | 1                        | 6                           | 0.000310016     |
| 491 | miRNA-SNiPer                    | 2015                           | 1                        | 3                           | 0.000310016     |
| 492 | mirTarPri                       | 2013                           | 1                        | 3                           | 0.000310016     |
| 493 | Bioinformatics Resource Manager | 2012                           | 2                        | 27                          | 0.000309578     |
| 494 | RepTar                          | 2011                           | 1                        | 14                          | 0.000309295     |
| 495 | miRD                            | 2011                           | 1                        | 7                           | 0.000309087     |
| 496 | ncRNAclassifier                 | 2012                           | 1                        | 4                           | 0.000308687     |
| 497 | mircisreg                       | 2008                           | 1                        | 4                           | 0.000308374     |
| 498 | ProMISe                         | 2014                           | 1                        | 13                          | 0.000308253     |
| 499 | GrapeMiRNA                      | 2009                           | 1                        | 2                           | 0.000307391     |
| 500 | RMBase                          | 2017                           | 2                        | 13                          | 0.000307341     |
| 501 | miRNAprediction                 | 2012                           | 1                        | 5                           | 0.000307341     |
| 502 | MiRduplexSVM                    | 2015                           | 1                        | 3                           | 0.000307341     |
| 503 | RBP-Var                         | 2016                           | 1                        | 2                           | 0.000307341     |
| 504 | ToppMiR                         | 2014                           | 1                        | 5                           | 0.000307284     |
| 505 | ifmda                           | 2016                           | 1                        | 43                          | 0.000305152     |
| 506 | FARNA                           | 2017                           | 1                        | 2                           | 0.000305152     |
| 507 | isomiR-SEA                      | 2016                           | 1                        | 1                           | 0.000305152     |
| 508 | miRNeye                         | 2010                           | 1                        | 60                          | 0.000304588     |
| 509 | miReg                           | 2010                           | 1                        | 3                           | 0.00030345      |
| 510 | NRDR                            | 2012                           | 1                        | 6                           | 0.000303328     |
| 511 | PlantMirnaT                     | 2015                           | 1                        | 4                           | 0.000303328     |
| 512 | StarScan                        | 2015                           | 1                        | 4                           | 0.000303328     |
| 513 | miRdentify                      | 2014                           | 1                        | 4                           | 0.000303328     |
| 514 | MirPlex                         | 2013                           | 1                        | 4                           | 0.000303328     |
| 515 | HomoTarget                      | 2013                           | 1                        | 4                           | 0.000303328     |
| 516 | miRHiC                          | 2013                           | 1                        | 1                           | 0.000303328     |
| 517 | RandA                           | 2012                           | 1                        | 6                           | 0.000303249     |
| 518 | tsmti                           | 2014                           | 1                        | 5                           | 0.000302565     |
| 519 | Screensaver                     | 2010                           | 1                        | 12                          | 0.000301785     |
| 520 | sRNAMap                         | 2009                           | 1                        | 30                          | 0.000301602     |
| 521 | MiRNA GO Annotation Manual      | 2016                           | 1                        | 4                           | 0.000301602     |
| 522 | Geoseq                          | 2010                           | 1                        | 3                           | 0.000300635     |
| 523 | PARma                           | 2013                           | 1                        | 14                          | 0.000300462     |
| 524 | CLIPSeqTools                    | 2016                           | 1                        | 5                           | 0.000300462     |
| 525 | mirSOM                          | 2011                           | 1                        | 8                           | 0.000299315     |

|     | <b>Tool Name</b> | <b>Latest Publication Year</b> | <b>Publication Count</b> | <b>Total Citation Count</b> | <b>Pagerank</b> |
|-----|------------------|--------------------------------|--------------------------|-----------------------------|-----------------|
| 526 | MISIS            | 2016                           | 2                        | 7                           | 0.000299315     |
| 527 | Mirinho          | 2015                           | 1                        | 1                           | 0.000298915     |
| 528 | miRBoost         | 2015                           | 1                        | 2                           | 0.000298915     |
| 529 | iMcRNA           | 2015                           | 1                        | 46                          | 0.000298312     |
| 530 | iMiRNA-PseDPC    | 2016                           | 1                        | 29                          | 0.000298312     |
| 531 | miRNA-deKmer     | 2015                           | 1                        | 27                          | 0.000298312     |
| 532 | MNDR             | 2017                           | 2                        | 22                          | 0.000298312     |
| 533 | miRNA-dis        | 2015                           | 1                        | 14                          | 0.000298312     |
| 534 | SolmiRNA         | 2011                           | 1                        | 12                          | 0.000298312     |
| 535 | targetS          | 2014                           | 1                        | 8                           | 0.000298312     |
| 536 | HNOCDDB          | 2012                           | 1                        | 5                           | 0.000298312     |
| 537 | miRTour          | 2011                           | 1                        | 4                           | 0.000298312     |
| 538 | SplamiR          | 2011                           | 1                        | 2                           | 0.000297193     |
| 539 | myMIR            | 2011                           | 1                        | 8                           | 0.000297133     |
| 540 | EpimiR           | 2014                           | 1                        | 7                           | 0.00029664      |
| 541 | ComiRNet         | 2015                           | 1                        | 2                           | 0.000295936     |
| 542 | ERISdb           | 2013                           | 1                        | 11                          | 0.000295327     |
| 543 | iSRAP            | 2015                           | 1                        | 4                           | 0.000295302     |
| 544 | miRModule        | 2015                           | 1                        | 3                           | 0.000295302     |
| 545 | SurvMicro        | 2014                           | 1                        | 11                          | 0.000295203     |
| 546 | PROGmiR          | 2012                           | 1                        | 9                           | 0.000295203     |
| 547 | DASHR            | 2016                           | 1                        | 3                           | 0.000295203     |
| 548 | CancerNet        | 2015                           | 1                        | 2                           | 0.000295203     |
| 549 | miSEA            | 2015                           | 1                        | 2                           | 0.000295077     |
| 550 | Omics Pipe       | 2015                           | 1                        | 13                          | 0.000294729     |
| 551 | MirID            | 2013                           | 1                        | 2                           | 0.000293296     |
| 552 | miRTCat          | 2013                           | 1                        | 6                           | 0.00029278      |
| 553 | miEAA            | 2016                           | 1                        | 8                           | 0.000291862     |
| 554 | miRTargetLink    | 2016                           | 1                        | 8                           | 0.000291862     |
| 555 | mythology        | 2015                           | 1                        | 5                           | 0.000291862     |
| 556 | Raccess          | 2011                           | 1                        | 14                          | 0.000291289     |
| 557 | SNPinfo          | 2009                           | 1                        | 206                         | 0.000283263     |
| 558 | DroID            | 2011                           | 1                        | 75                          | 0.000283263     |
| 559 | ToppCluster      | 2010                           | 1                        | 65                          | 0.000283263     |
| 560 | SIPHT            | 2008                           | 1                        | 64                          | 0.000283263     |
| 561 | SZGR             | 2010                           | 1                        | 44                          | 0.000283263     |
| 562 | TRiP             | 2012                           | 1                        | 36                          | 0.000283263     |
| 563 | PerM             | 2009                           | 1                        | 36                          | 0.000283263     |
| 564 | MIRUMIR          | 2013                           | 1                        | 32                          | 0.000283263     |
| 565 | plateletomics    | 2014                           | 1                        | 30                          | 0.000283263     |
| 566 | SAMMate          | 2011                           | 1                        | 28                          | 0.000283263     |
| 567 | USAGP            | 2010                           | 1                        | 26                          | 0.000283263     |
| 568 | fast-db          | 2007                           | 1                        | 24                          | 0.000283263     |
| 569 | iMiRNA-SSF       | 2016                           | 1                        | 23                          | 0.000283263     |

| Tool Name | Latest Publication Year                | Publication Count | Total Citation Count | Pagerank |             |
|-----------|----------------------------------------|-------------------|----------------------|----------|-------------|
| 570       | CircInteractome                        | 2016              | 1                    | 22       | 0.000283263 |
| 571       | VARIANT                                | 2012              | 1                    | 22       | 0.000283263 |
| 572       | miRquant                               | 2016              | 2                    | 21       | 0.000283263 |
| 573       | OMICtools                              | 2014              | 1                    | 20       | 0.000283263 |
| 574       | Cepred                                 | 2009              | 1                    | 20       | 0.000283263 |
| 575       | CircNet                                | 2016              | 1                    | 19       | 0.000283263 |
| 576       | microRNAviewer                         | 2012              | 1                    | 19       | 0.000283263 |
| 577       | UP-TORR                                | 2013              | 1                    | 17       | 0.000283263 |
| 578       | si-shRNA Selector                      | 2010              | 1                    | 17       | 0.000283263 |
| 579       | RNAi Codex                             | 2006              | 1                    | 17       | 0.000283263 |
| 580       | ChroMoS                                | 2013              | 1                    | 16       | 0.000283263 |
| 581       | MD-SeeGH                               | 2008              | 1                    | 16       | 0.000283263 |
| 582       | GBM-BioDP                              | 2014              | 1                    | 15       | 0.000283263 |
| 583       | SEED                                   | 2011              | 1                    | 15       | 0.000283263 |
| 584       | RDMAS                                  | 2006              | 1                    | 15       | 0.000283263 |
| 585       | RegNetwork                             | 2015              | 1                    | 14       | 0.000283263 |
| 586       | ProNet                                 | 2010              | 1                    | 14       | 0.000283263 |
| 587       | AGD                                    | 2009              | 1                    | 14       | 0.000283263 |
| 588       | siVirus                                | 2006              | 1                    | 14       | 0.000283263 |
| 589       | Centrality-based Pathway Enrichment    | 2012              | 1                    | 13       | 0.000283263 |
| 590       | GenomeTraFac                           | 2007              | 1                    | 13       | 0.000283263 |
| 591       | fat_deposition                         | 2013              | 1                    | 12       | 0.000283263 |
| 592       | siSPOTR                                | 2013              | 1                    | 12       | 0.000283263 |
| 593       | CellBase                               | 2012              | 1                    | 12       | 0.000283263 |
| 594       | RCDB                                   | 2012              | 1                    | 12       | 0.000283263 |
| 595       | T-REX                                  | 2010              | 1                    | 12       | 0.000283263 |
| 596       | Orchidstra                             | 2017              | 2                    | 11       | 0.000283263 |
| 597       | BCGSC miRNA Profiling Pipeline         | 2016              | 1                    | 11       | 0.000283263 |
| 598       | Pancreatic Cancer Database             | 2014              | 1                    | 11       | 0.000283263 |
| 599       | GeneHub-GEPIS                          | 2007              | 1                    | 11       | 0.000283263 |
| 600       | TGRD                                   | 2014              | 1                    | 10       | 0.000283263 |
| 601       | canEvolve                              | 2013              | 1                    | 10       | 0.000283263 |
| 602       | A web-based bioinformatics interface a | 2012              | 1                    | 10       | 0.000283263 |
| 603       | RIDDLE                                 | 2012              | 1                    | 10       | 0.000283263 |
| 604       | UTRome.org                             | 2008              | 1                    | 10       | 0.000283263 |
| 605       | ARN (Autophagy)                        | 2015              | 1                    | 9        | 0.000283263 |
| 606       | TriplexRna                             | 2014              | 1                    | 9        | 0.000283263 |
| 607       | Structuring osteosarcoma knowledge     | 2014              | 1                    | 9        | 0.000283263 |
| 608       | TTS mapping                            | 2009              | 1                    | 9        | 0.000283263 |
| 609       | pssRNAMiner                            | 2008              | 1                    | 9        | 0.000283263 |
| 610       | netClass                               | 2014              | 2                    | 8        | 0.000283263 |
| 611       | MCMG                                   | 2013              | 1                    | 8        | 0.000283263 |
| 612       | MREdictor                              | 2013              | 1                    | 8        | 0.000283263 |
| 613       | imiRTP                                 | 2012              | 1                    | 8        | 0.000283263 |

|     | <b>Tool Name</b>                   | <b>Latest Publication Year</b> | <b>Publication Count</b> | <b>Total Citation Count</b> | <b>Pagerank</b> |
|-----|------------------------------------|--------------------------------|--------------------------|-----------------------------|-----------------|
| 614 | MysiRNA-designer                   | 2011                           | 1                        | 8                           | 0.000283263     |
| 615 | Pipeline to analyze Illumina reads | 2011                           | 1                        | 8                           | 0.000283263     |
| 616 | PeTMbase                           | 2016                           | 1                        | 7                           | 0.000283263     |
| 617 | DMD                                | 2015                           | 1                        | 7                           | 0.000283263     |
| 618 | ChiloDB                            | 2014                           | 1                        | 7                           | 0.000283263     |
| 619 | MirStress                          | 2013                           | 1                        | 7                           | 0.000283263     |
| 620 | RENATO                             | 2012                           | 1                        | 7                           | 0.000283263     |
| 621 | BiTargeting                        | 2010                           | 1                        | 7                           | 0.000283263     |
| 622 | LeARN                              | 2008                           | 1                        | 7                           | 0.000283263     |
| 623 | GeneACT                            | 2006                           | 1                        | 7                           | 0.000283263     |
| 624 | rVarBase                           | 2016                           | 1                        | 6                           | 0.000283263     |
| 625 | TMMN                               | 2015                           | 1                        | 6                           | 0.000283263     |
| 626 | MtiBase                            | 2015                           | 1                        | 6                           | 0.000283263     |
| 627 | PEpiD                              | 2013                           | 1                        | 6                           | 0.000283263     |
| 628 | C-mii                              | 2012                           | 1                        | 6                           | 0.000283263     |
| 629 | IGDB.NSCLC                         | 2012                           | 1                        | 6                           | 0.000283263     |
| 630 | miR-EdiTar                         | 2012                           | 1                        | 6                           | 0.000283263     |
| 631 | miR2Gene                           | 2011                           | 1                        | 6                           | 0.000283263     |
| 632 | SBM                                | 2008                           | 1                        | 6                           | 0.000283263     |
| 633 | RiboSubstrates                     | 2006                           | 1                        | 6                           | 0.000283263     |
| 634 | miRPathDB                          | 2017                           | 1                        | 5                           | 0.000283263     |
| 635 | miRNet                             | 2016                           | 1                        | 5                           | 0.000283263     |
| 636 | miARma-Seq                         | 2016                           | 1                        | 5                           | 0.000283263     |
| 637 | IntNetLncSim                       | 2016                           | 1                        | 5                           | 0.000283263     |
| 638 | miRVine                            | 2015                           | 1                        | 5                           | 0.000283263     |
| 639 | GermlncRNA                         | 2015                           | 1                        | 5                           | 0.000283263     |
| 640 | CSZ                                | 2014                           | 1                        | 5                           | 0.000283263     |
| 641 | Vicinal                            | 2014                           | 1                        | 5                           | 0.000283263     |
| 642 | ncPred                             | 2014                           | 1                        | 5                           | 0.000283263     |
| 643 | miRSeq                             | 2014                           | 1                        | 5                           | 0.000283263     |
| 644 | PHANTOM                            | 2013                           | 1                        | 5                           | 0.000283263     |
| 645 | BCmicrO                            | 2012                           | 1                        | 5                           | 0.000283263     |
| 646 | BeadSme                            | 2011                           | 1                        | 5                           | 0.000283263     |
| 647 | expmicro                           | 2010                           | 1                        | 5                           | 0.000283263     |
| 648 | MixDTrees                          | 2007                           | 1                        | 5                           | 0.000283263     |
| 649 | RNALOSS                            | 2005                           | 1                        | 5                           | 0.000283263     |
| 650 | P-SAMS                             | 2016                           | 1                        | 4                           | 0.000283263     |
| 651 | ZIKV-CDB                           | 2016                           | 1                        | 4                           | 0.000283263     |
| 652 | spongeScan                         | 2016                           | 1                        | 4                           | 0.000283263     |
| 653 | Tailor                             | 2015                           | 1                        | 4                           | 0.000283263     |
| 654 | HumanViCe                          | 2014                           | 1                        | 4                           | 0.000283263     |
| 655 | VetBioBase                         | 2014                           | 1                        | 4                           | 0.000283263     |
| 656 | miR-Synth                          | 2014                           | 1                        | 4                           | 0.000283263     |
| 657 | MixMir                             | 2014                           | 1                        | 4                           | 0.000283263     |

| Tool Name | Latest Publication Year | Publication Count | Total Citation Count | Pagerank |             |
|-----------|-------------------------|-------------------|----------------------|----------|-------------|
| 658       | COGERE                  | 2014              | 1                    | 4        | 0.000283263 |
| 659       | ncRNA-DB                | 2014              | 1                    | 4        | 0.000283263 |
| 660       | hLGDB                   | 2013              | 1                    | 4        | 0.000283263 |
| 661       | mirdba                  | 2013              | 1                    | 4        | 0.000283263 |
| 662       | ptrguide                | 2012              | 1                    | 4        | 0.000283263 |
| 663       | HTSmix                  | 2011              | 1                    | 4        | 0.000283263 |
| 664       | miRNA_code              | 2009              | 1                    | 4        | 0.000283263 |
| 665       | ccNET                   | 2017              | 1                    | 3        | 0.000283263 |
| 666       | LNCediting              | 2017              | 1                    | 3        | 0.000283263 |
| 667       | SpermBase               | 2016              | 1                    | 3        | 0.000283263 |
| 668       | miRVaS                  | 2016              | 1                    | 3        | 0.000283263 |
| 669       | CARD                    | 2016              | 1                    | 3        | 0.000283263 |
| 670       | BiLTR                   | 2015              | 1                    | 3        | 0.000283263 |
| 671       | miRNALasso              | 2015              | 1                    | 3        | 0.000283263 |
| 672       | SubpathwayGMir          | 2015              | 1                    | 3        | 0.000283263 |
| 673       | ReNE                    | 2014              | 1                    | 3        | 0.000283263 |
| 674       | OvMark                  | 2014              | 1                    | 3        | 0.000283263 |
| 675       | MmPalateMiRNA           | 2013              | 1                    | 3        | 0.000283263 |
| 676       | miRTar Hunter           | 2013              | 1                    | 3        | 0.000283263 |
| 677       | Ssa miRNAs DB           | 2012              | 1                    | 3        | 0.000283263 |
| 678       | miREE                   | 2011              | 1                    | 3        | 0.000283263 |
| 679       | GARNET                  | 2011              | 1                    | 3        | 0.000283263 |
| 680       | Ebbie                   | 2006              | 1                    | 3        | 0.000283263 |
| 681       | miRBShunter             | 2017              | 1                    | 2        | 0.000283263 |
| 682       | miratlas                | 2017              | 1                    | 2        | 0.000283263 |
| 683       | POSTAR                  | 2017              | 1                    | 2        | 0.000283263 |
| 684       | Listeriomics            | 2017              | 1                    | 2        | 0.000283263 |
| 685       | miRSM                   | 2017              | 1                    | 2        | 0.000283263 |
| 686       | SMEpred workbench       | 2016              | 1                    | 2        | 0.000283263 |
| 687       | iNMF                    | 2016              | 1                    | 2        | 0.000283263 |
| 688       | chimiRic                | 2016              | 1                    | 2        | 0.000283263 |
| 689       | LMMEl-miR-miner         | 2016              | 1                    | 2        | 0.000283263 |
| 690       | TargetExpress           | 2016              | 1                    | 2        | 0.000283263 |
| 691       | LBSizeClev              | 2016              | 1                    | 2        | 0.000283263 |
| 692       | DsTRD                   | 2016              | 1                    | 2        | 0.000283263 |
| 693       | miRcomp                 | 2016              | 1                    | 2        | 0.000283263 |
| 694       | WSNF                    | 2016              | 1                    | 2        | 0.000283263 |
| 695       | SorghumFDB              | 2016              | 1                    | 2        | 0.000283263 |
| 696       | miRLiN                  | 2016              | 1                    | 2        | 0.000283263 |
| 697       | MiREN                   | 2016              | 1                    | 2        | 0.000283263 |
| 698       | PMF NETWORK MODEL       | 2016              | 1                    | 2        | 0.000283263 |
| 699       | PC-TraFF                | 2015              | 1                    | 2        | 0.000283263 |
| 700       | SubmiRine               | 2015              | 1                    | 2        | 0.000283263 |
| 701       | targetrunningsum        | 2015              | 1                    | 2        | 0.000283263 |



|     | <b>Tool Name</b>                      | <b>Latest Publication Year</b> | <b>Publication Count</b> | <b>Total Citation Count</b> | <b>Pagerank</b> |
|-----|---------------------------------------|--------------------------------|--------------------------|-----------------------------|-----------------|
| 702 | SimiRa                                | 2015                           | 1                        | 2                           | 0.000283263     |
| 703 | MagiCMicroRna                         | 2015                           | 1                        | 2                           | 0.000283263     |
| 704 | UQAM Wheat microRNA Portal            | 2015                           | 1                        | 2                           | 0.000283263     |
| 705 | plantDARIO                            | 2014                           | 1                        | 2                           | 0.000283263     |
| 706 | PGS                                   | 2014                           | 1                        | 2                           | 0.000283263     |
| 707 | OncomiRdbB                            | 2014                           | 1                        | 2                           | 0.000283263     |
| 708 | ExiMiR                                | 2014                           | 1                        | 2                           | 0.000283263     |
| 709 | mirCoX                                | 2013                           | 1                        | 2                           | 0.000283263     |
| 710 | miRCluster                            | 2012                           | 1                        | 2                           | 0.000283263     |
| 711 | MicroLive                             | 2012                           | 1                        | 2                           | 0.000283263     |
| 712 | PDbase                                | 2009                           | 1                        | 2                           | 0.000283263     |
| 713 | PAGER                                 | 2017                           | 2                        | 1                           | 0.000283263     |
| 714 | PceRBase                              | 2017                           | 1                        | 1                           | 0.000283263     |
| 715 | microRNAome                           | 2017                           | 1                        | 1                           | 0.000283263     |
| 716 | miSTAR                                | 2017                           | 1                        | 1                           | 0.000283263     |
| 717 | RAIN                                  | 2017                           | 1                        | 1                           | 0.000283263     |
| 718 | TPS                                   | 2017                           | 1                        | 1                           | 0.000283263     |
| 719 | MirAncestar                           | 2017                           | 1                        | 1                           | 0.000283263     |
| 720 | Exo-miRExplorer                       | 2017                           | 1                        | 1                           | 0.000283263     |
| 721 | miRsig                                | 2017                           | 1                        | 1                           | 0.000283263     |
| 722 | IBRel                                 | 2017                           | 1                        | 1                           | 0.000283263     |
| 723 | Mirnovio                              | 2017                           | 1                        | 1                           | 0.000283263     |
| 724 | CKDdb                                 | 2017                           | 1                        | 1                           | 0.000283263     |
| 725 | iDeep                                 | 2017                           | 1                        | 1                           | 0.000283263     |
| 726 | Miracle                               | 2016                           | 1                        | 1                           | 0.000283263     |
| 727 | CyTRANSFINDER                         | 2016                           | 1                        | 1                           | 0.000283263     |
| 728 | Infinity                              | 2016                           | 1                        | 1                           | 0.000283263     |
| 729 | gbCRC                                 | 2016                           | 1                        | 1                           | 0.000283263     |
| 730 | Automatic learning of pre-miRNAs from | 2016                           | 1                        | 1                           | 0.000283263     |
| 731 | HiTSeekR                              | 2016                           | 1                        | 1                           | 0.000283263     |
| 732 | BBBomics                              | 2016                           | 1                        | 1                           | 0.000283263     |
| 733 | AnnoLnc                               | 2016                           | 1                        | 1                           | 0.000283263     |
| 734 | ChemiRs                               | 2016                           | 1                        | 1                           | 0.000283263     |
| 735 | miRNAsong                             | 2016                           | 1                        | 1                           | 0.000283263     |
| 736 | MiRComb                               | 2016                           | 1                        | 1                           | 0.000283263     |
| 737 | ImiRP                                 | 2016                           | 1                        | 1                           | 0.000283263     |
| 738 | imRNA                                 | 2016                           | 1                        | 1                           | 0.000283263     |
| 739 | BmncRNadb                             | 2016                           | 1                        | 1                           | 0.000283263     |
| 740 | STarMirDB                             | 2016                           | 1                        | 1                           | 0.000283263     |
| 741 | RNADualPF                             | 2016                           | 1                        | 1                           | 0.000283263     |
| 742 | FARE-CAFE                             | 2015                           | 1                        | 1                           | 0.000283263     |
| 743 | SMIRP                                 | 2015                           | 1                        | 1                           | 0.000283263     |
| 744 | miREC                                 | 2015                           | 1                        | 1                           | 0.000283263     |
| 745 | OCDB                                  | 2015                           | 1                        | 1                           | 0.000283263     |

| Tool Name | Latest Publication Year  | Publication Count | Total Citation Count | Pagerank |             |
|-----------|--------------------------|-------------------|----------------------|----------|-------------|
| 746       | sydSeq                   | 2015              | 1                    | 1        | 0.000283263 |
| 747       | ViralmiR                 | 2015              | 1                    | 1        | 0.000283263 |
| 748       | miRLocator               | 2015              | 1                    | 1        | 0.000283263 |
| 749       | PPImiRFS                 | 2015              | 1                    | 1        | 0.000283263 |
| 750       | miFRame                  | 2015              | 1                    | 1        | 0.000283263 |
| 751       | mirPRO                   | 2015              | 1                    | 1        | 0.000283263 |
| 752       | ENViz                    | 2015              | 1                    | 1        | 0.000283263 |
| 753       | ptRNApred                | 2014              | 1                    | 1        | 0.000283263 |
| 754       | CREAM                    | 2014              | 1                    | 1        | 0.000283263 |
| 755       | SoyFN                    | 2014              | 1                    | 1        | 0.000283263 |
| 756       | iSubgraph                | 2013              | 1                    | 1        | 0.000283263 |
| 757       | pseudoMap                | 2013              | 1                    | 1        | 0.000283263 |
| 758       | SbacHTS                  | 2013              | 1                    | 1        | 0.000283263 |
| 759       | genYsis Toolbox          | 2013              | 1                    | 1        | 0.000283263 |
| 760       | H-RVM                    | 2013              | 1                    | 1        | 0.000283263 |
| 761       | MMpred                   | 2012              | 1                    | 1        | 0.000283263 |
| 762       | Ortho2ExpressMatrix      | 2011              | 1                    | 1        | 0.000283263 |
| 763       | Antagomirbase            | 2011              | 1                    | 1        | 0.000283263 |
| 764       | PsRNA                    | 2010              | 1                    | 1        | 0.000283263 |
| 765       | rna-wl                   | 2010              | 1                    | 1        | 0.000283263 |
| 766       | miRAS                    | 2007              | 1                    | 1        | 0.000283263 |
| 767       | RScan                    | 2007              | 1                    | 1        | 0.000283263 |
| 768       | miRMaster                | 2017              | 2                    | 0        | 0.000283263 |
| 769       | ARN (Adipogenesis)       | 2016              | 2                    | 0        | 0.000283263 |
| 770       | Tiresias                 | 2018              | 1                    | 0        | 0.000283263 |
| 771       | BCIP                     | 2017              | 1                    | 0        | 0.000283263 |
| 772       | XTalkDB                  | 2017              | 1                    | 0        | 0.000283263 |
| 773       | miRnalyze                | 2017              | 1                    | 0        | 0.000283263 |
| 774       | decodeRNA                | 2017              | 1                    | 0        | 0.000283263 |
| 775       | miRTar2GO                | 2017              | 1                    | 0        | 0.000283263 |
| 776       | PCBC                     | 2017              | 1                    | 0        | 0.000283263 |
| 777       | findr                    | 2017              | 1                    | 0        | 0.000283263 |
| 778       | metaMIR                  | 2017              | 1                    | 0        | 0.000283263 |
| 779       | Lethal microRNA database | 2017              | 1                    | 0        | 0.000283263 |
| 780       | Seten                    | 2017              | 1                    | 0        | 0.000283263 |
| 781       | RNA-Seq Viewer           | 2017              | 1                    | 0        | 0.000283263 |
| 782       | RWRMTN                   | 2017              | 1                    | 0        | 0.000283263 |
| 783       | QuickMIRSeq              | 2017              | 1                    | 0        | 0.000283263 |
| 784       | T2DiACoD                 | 2017              | 1                    | 0        | 0.000283263 |
| 785       | icTAIR                   | 2017              | 1                    | 0        | 0.000283263 |
| 786       | MKRMDA                   | 2017              | 1                    | 0        | 0.000283263 |
| 787       | isomiR-Benchmark         | 2017              | 1                    | 0        | 0.000283263 |
| 788       | ODIN-bc2015-miRNA        | 2017              | 1                    | 0        | 0.000283263 |
| 789       | isomiR2Function          | 2017              | 1                    | 0        | 0.000283263 |

|     | <b>Tool Name</b> | <b>Latest Publication Year</b> | <b>Publication Count</b> | <b>Total Citation Count</b> | <b>Pagerank</b> |
|-----|------------------|--------------------------------|--------------------------|-----------------------------|-----------------|
| 790 | SpidermiR        | 2017                           | 1                        | 0                           | 0.000283263     |
| 791 | GEAR             | 2017                           | 1                        | 0                           | 0.000283263     |
| 792 | unitas           | 2017                           | 1                        | 0                           | 0.000283263     |
| 793 | sRNAlyzer        | 2017                           | 1                        | 0                           | 0.000283263     |
| 794 | NSDNA            | 2017                           | 1                        | 0                           | 0.000283263     |
| 795 | BUFET            | 2017                           | 1                        | 0                           | 0.000283263     |
| 796 | Read-Split-Fly   | 2017                           | 1                        | 0                           | 0.000283263     |
| 797 | BioM2MetDisease  | 2017                           | 1                        | 0                           | 0.000283263     |
| 798 | VmTDB            | 2017                           | 1                        | 0                           | 0.000283263     |
| 799 | nRC              | 2017                           | 1                        | 0                           | 0.000283263     |
| 800 | miRvial          | 2017                           | 1                        | 0                           | 0.000283263     |
| 801 | CSmiRTar         | 2017                           | 1                        | 0                           | 0.000283263     |
| 802 | contextMMIA      | 2017                           | 1                        | 0                           | 0.000283263     |
| 803 | MiRNATIP         | 2016                           | 1                        | 0                           | 0.000283263     |
| 804 | LimiTT           | 2016                           | 1                        | 0                           | 0.000283263     |
| 805 | CSCdb            | 2016                           | 1                        | 0                           | 0.000283263     |
| 806 | MITHrIL          | 2016                           | 1                        | 0                           | 0.000283263     |
| 807 | PmiRExAt         | 2016                           | 1                        | 0                           | 0.000283263     |
| 808 | mirMeta          | 2016                           | 1                        | 0                           | 0.000283263     |
| 809 | miRNA Digger     | 2016                           | 1                        | 0                           | 0.000283263     |
| 810 | RiceATM          | 2016                           | 1                        | 0                           | 0.000283263     |
| 811 | SePIA            | 2016                           | 1                        | 0                           | 0.000283263     |
| 812 | MMiRNA-Viewer    | 2016                           | 1                        | 0                           | 0.000283263     |
| 813 | TarPmiR          | 2016                           | 1                        | 0                           | 0.000283263     |
| 814 | MiRSEA           | 2016                           | 1                        | 0                           | 0.000283263     |
| 815 | SparseMFEFold    | 2016                           | 1                        | 0                           | 0.000283263     |
| 816 | SHARAKU          | 2016                           | 1                        | 0                           | 0.000283263     |
| 817 | SMiRK            | 2015                           | 1                        | 0                           | 0.000283263     |
| 818 | Ginger Est       | 2015                           | 1                        | 0                           | 0.000283263     |
| 819 | GPA              | 2015                           | 1                        | 0                           | 0.000283263     |
| 820 | miRMOD           | 2015                           | 1                        | 0                           | 0.000283263     |
| 821 | mBISON           | 2015                           | 1                        | 0                           | 0.000283263     |
| 822 | miCancer         | 2014                           | 1                        | 0                           | 0.000283263     |
| 823 | C2Analyzer       | 2014                           | 1                        | 0                           | 0.000283263     |
| 824 | DevMouse         | 2014                           | 1                        | 0                           | 0.000283263     |
| 825 | ProteoMirExpress | 2013                           | 1                        | 0                           | 0.000283263     |
| 826 | VAN              | 2013                           | 1                        | 0                           | 0.000283263     |
| 827 | MiRAuto          | 2013                           | 1                        | 0                           | 0.000283263     |
| 828 | MinDist          | 2012                           | 1                        | 0                           | 0.000283263     |
| 829 | RAmiRNA          | 2012                           | 1                        | 0                           | 0.000283263     |
| 830 | IntmiR           | 2011                           | 1                        | 0                           | 0.000283263     |
| 831 | MIRNA-DISTILLER  | 2011                           | 1                        | 0                           | 0.000283263     |
| 832 | GiSAO.db         | 2011                           | 1                        | 0                           | 0.000283263     |
| 833 | Mi-DISCOVERER    | 2010                           | 1                        | 0                           | 0.000283263     |

|     | <b>Tool Name</b>        | <b>Latest Publication Year</b> | <b>Publication Count</b> | <b>Total Citation Count</b> | <b>Pagerank</b> |
|-----|-------------------------|--------------------------------|--------------------------|-----------------------------|-----------------|
| 834 | BatchGenAna             | 2009                           | 1                        | 0                           | 0.000283263     |
| 835 | EvoRSR                  | 2009                           | 1                        | 0                           | 0.000283263     |
| 836 | SpecificDB              | 2007                           | 1                        | 0                           | 0.000283263     |
| 837 | CrossLink               | 2006                           | 1                        | 0                           | 0.000283263     |
| 838 | GO-Elite                | 2012                           | 1                        | 69                          | 0               |
| 839 | ATARiS                  | 2013                           | 1                        | 52                          | 0               |
| 840 | FlyAtlas                | 2017                           | 2                        | 49                          | 0               |
| 841 | ARTS                    | 2006                           | 2                        | 48                          | 0               |
| 842 | NanoStringNorm          | 2012                           | 1                        | 48                          | 0               |
| 843 | IDT SciTools            | 2008                           | 1                        | 39                          | 0               |
| 844 | GEISHA                  | 2007                           | 2                        | 31                          | 0               |
| 845 | MethHC                  | 2015                           | 1                        | 31                          | 0               |
| 846 | PACdb                   | 2010                           | 1                        | 29                          | 0               |
| 847 | PD map                  | 2014                           | 1                        | 26                          | 0               |
| 848 | SNPeffect and PupaSuite | 2008                           | 1                        | 26                          | 0               |
| 849 | QuickMap                | 2009                           | 1                        | 20                          | 0               |
| 850 | Greglist                | 2008                           | 1                        | 20                          | 0               |
| 851 | iBeetle-Base            | 2015                           | 1                        | 18                          | 0               |
| 852 | miRprimer               | 2014                           | 1                        | 18                          | 0               |
| 853 | miRClassify             | 2014                           | 1                        | 18                          | 0               |
| 854 | DiseaseConnect          | 2014                           | 1                        | 18                          | 0               |
| 855 | OmicKriging             | 2014                           | 1                        | 15                          | 0               |
| 856 | GeneFriends             | 2015                           | 1                        | 14                          | 0               |
| 857 | MicroRazerS             | 2010                           | 1                        | 14                          | 0               |
| 858 | SNPLogic                | 2009                           | 1                        | 14                          | 0               |
| 859 | sRNATarget              | 2008                           | 1                        | 12                          | 0               |
| 860 | Wormnet                 | 2014                           | 2                        | 11                          | 0               |
| 861 | birta                   | 2012                           | 1                        | 11                          | 0               |
| 862 | miRNA_Targets           | 2012                           | 1                        | 11                          | 0               |
| 863 | MicroSyn                | 2011                           | 1                        | 11                          | 0               |
| 864 | SCLC                    | 2016                           | 1                        | 10                          | 0               |
| 865 | Radiogenomics           | 2015                           | 1                        | 10                          | 0               |
| 866 | HCCNet                  | 2010                           | 1                        | 10                          | 0               |
| 867 | mirtronPred             | 2012                           | 1                        | 9                           | 0               |
| 868 | PHMMTSs                 | 2005                           | 1                        | 9                           | 0               |
| 869 | GenoSkyline             | 2016                           | 1                        | 8                           | 0               |
| 870 | miR_Path                | 2015                           | 1                        | 7                           | 0               |
| 871 | DINGO                   | 2015                           | 1                        | 7                           | 0               |
| 872 | AraPath                 | 2012                           | 1                        | 7                           | 0               |
| 873 | MTDB                    | 2010                           | 1                        | 7                           | 0               |
| 874 | JBCB                    | 2010                           | 1                        | 7                           | 0               |
| 875 | MIRAGAA                 | 2010                           | 1                        | 7                           | 0               |
| 876 | At_miRNA                | 2013                           | 1                        | 6                           | 0               |
| 877 | ed_scan                 | 2003                           | 1                        | 6                           | 0               |

|     | <b>Tool Name</b>              | <b>Latest Publication Year</b> | <b>Publication Count</b> | <b>Total Citation Count</b> | <b>Pagerank</b> |
|-----|-------------------------------|--------------------------------|--------------------------|-----------------------------|-----------------|
| 878 | Carnation DB                  | 2014                           | 1                        | 5                           | 0               |
| 879 | CePa                          | 2013                           | 1                        | 5                           | 0               |
| 880 | microDoR                      | 2012                           | 1                        | 5                           | 0               |
| 881 | OligoFaktory                  | 2006                           | 1                        | 5                           | 0               |
| 882 | InCroMAP                      | 2013                           | 2                        | 4                           | 0               |
| 883 | MiRTDL                        | 2016                           | 1                        | 4                           | 0               |
| 884 | miTRATA                       | 2016                           | 1                        | 4                           | 0               |
| 885 | RNAComposer                   | 2016                           | 1                        | 4                           | 0               |
| 886 | biRte                         | 2015                           | 1                        | 4                           | 0               |
| 887 | Loregic                       | 2015                           | 1                        | 4                           | 0               |
| 888 | GAmiRdb                       | 2014                           | 1                        | 4                           | 0               |
| 889 | BioVLAB-MMIA                  | 2012                           | 1                        | 4                           | 0               |
| 890 | miRSeqNovel                   | 2012                           | 1                        | 4                           | 0               |
| 891 | dChip                         | 2011                           | 1                        | 4                           | 0               |
| 892 | DynaMod                       | 2010                           | 1                        | 4                           | 0               |
| 893 | PGnet                         | 2009                           | 1                        | 4                           | 0               |
| 894 | TROD                          | 2004                           | 1                        | 4                           | 0               |
| 895 | PlantcircBase                 | 2017                           | 1                        | 3                           | 0               |
| 896 | OmniSearch                    | 2016                           | 1                        | 3                           | 0               |
| 897 | PlanTE-MIR DB                 | 2016                           | 1                        | 3                           | 0               |
| 898 | EpimiRBase                    | 2016                           | 1                        | 3                           | 0               |
| 899 | miRNAfe                       | 2015                           | 1                        | 3                           | 0               |
| 900 | DREAM                         | 2015                           | 1                        | 3                           | 0               |
| 901 | BCCTBbp                       | 2015                           | 1                        | 3                           | 0               |
| 902 | activeMiRNA                   | 2013                           | 1                        | 3                           | 0               |
| 903 | mirnaDetect                   | 2013                           | 1                        | 3                           | 0               |
| 904 | Semirna                       | 2012                           | 1                        | 3                           | 0               |
| 905 | miRUPnet                      | 2012                           | 1                        | 3                           | 0               |
| 906 | miRmine                       | 2017                           | 1                        | 2                           | 0               |
| 907 | PlaMoM                        | 2017                           | 1                        | 2                           | 0               |
| 908 | GAMDB                         | 2016                           | 1                        | 2                           | 0               |
| 909 | miRpower                      | 2016                           | 1                        | 2                           | 0               |
| 910 | IsomiR Bank                   | 2016                           | 1                        | 2                           | 0               |
| 911 | RDDpred                       | 2016                           | 1                        | 2                           | 0               |
| 912 | MirCompare                    | 2016                           | 1                        | 2                           | 0               |
| 913 | CHRONOS                       | 2016                           | 1                        | 2                           | 0               |
| 914 | miXGENE                       | 2015                           | 1                        | 2                           | 0               |
| 915 | NqA                           | 2014                           | 1                        | 2                           | 0               |
| 916 | ShrinkBayes                   | 2014                           | 1                        | 2                           | 0               |
| 917 | LiverCancerMarkerRIF          | 2014                           | 1                        | 2                           | 0               |
| 918 | G-DOC                         | 2013                           | 1                        | 2                           | 0               |
| 919 | Exp. Verified microRNA-Target | 2013                           | 1                        | 2                           | 0               |
| 920 | miRTP                         | 2010                           | 1                        | 2                           | 0               |
| 921 | NoiseMaker                    | 2010                           | 1                        | 2                           | 0               |

| Tool Name | Latest Publication Year                  | Publication Count | Total Citation Count | Pagerank |   |
|-----------|------------------------------------------|-------------------|----------------------|----------|---|
| 922       | siRNAs with high specificity to the targ | 2008              | 1                    | 2        | 0 |
| 923       | START                                    | 2006              | 1                    | 2        | 0 |
| 924       | DSTHO                                    | 2006              | 1                    | 2        | 0 |
| 925       | NRSE                                     | 2006              | 1                    | 2        | 0 |
| 926       | ESPSearch                                | 2005              | 1                    | 2        | 0 |
| 927       | PACRAT                                   | 2003              | 1                    | 2        | 0 |
| 928       | miRNAmeConverter                         | 2017              | 1                    | 1        | 0 |
| 929       | iSmaRT                                   | 2017              | 1                    | 1        | 0 |
| 930       | The Porcine Translational Research Dat   | 2017              | 1                    | 1        | 0 |
| 931       | miRNA-ensemble                           | 2017              | 1                    | 1        | 0 |
| 932       | piccirNet                                | 2017              | 1                    | 1        | 0 |
| 933       | mirnanalyze                              | 2017              | 1                    | 1        | 0 |
| 934       | GED                                      | 2017              | 1                    | 1        | 0 |
| 935       | MetaMirClust                             | 2016              | 1                    | 1        | 0 |
| 936       | OfftargetFinder                          | 2016              | 1                    | 1        | 0 |
| 937       | AmiRNA Designer                          | 2016              | 1                    | 1        | 0 |
| 938       | SIM                                      | 2016              | 1                    | 1        | 0 |
| 939       | MicroTrout                               | 2016              | 1                    | 1        | 0 |
| 940       | Pseudo-3D Clustering                     | 2016              | 1                    | 1        | 0 |
| 941       | SlideBase                                | 2016              | 1                    | 1        | 0 |
| 942       | miRseqViewer                             | 2015              | 1                    | 1        | 0 |
| 943       | CoMoFinder                               | 2015              | 1                    | 1        | 0 |
| 944       | TopKLists                                | 2015              | 1                    | 1        | 0 |
| 945       | MSbind                                   | 2014              | 1                    | 1        | 0 |
| 946       | msgl                                     | 2014              | 1                    | 1        | 0 |
| 947       | LncEnvironmentDB                         | 2014              | 1                    | 1        | 0 |
| 948       | New support vector machine-based metl    | 2014              | 1                    | 1        | 0 |
| 949       | Mirin                                    | 2014              | 1                    | 1        | 0 |
| 950       | TmiRUSite and TmiROSite scripts          | 2014              | 1                    | 1        | 0 |
| 951       | comTAR                                   | 2014              | 1                    | 1        | 0 |
| 952       | EDMRP                                    | 2014              | 1                    | 1        | 0 |
| 953       | SARS                                     | 2013              | 1                    | 1        | 0 |
| 954       | UFFizi                                   | 2010              | 1                    | 1        | 0 |
| 955       | AmphiEST                                 | 2010              | 1                    | 1        | 0 |
| 956       | rnaworkbench                             | 2008              | 1                    | 1        | 0 |
| 957       | mTD                                      | 2017              | 2                    | 0        | 0 |
| 958       | ImmunemiR                                | 2017              | 2                    | 0        | 0 |
| 959       | Director                                 | 2018              | 1                    | 0        | 0 |
| 960       | RespCanDB                                | 2017              | 1                    | 0        | 0 |
| 961       | DisSetSim                                | 2017              | 1                    | 0        | 0 |
| 962       | 1-CMDb                                   | 2017              | 1                    | 0        | 0 |
| 963       | RISE                                     | 2017              | 1                    | 0        | 0 |
| 964       | DMTHNDM                                  | 2017              | 1                    | 0        | 0 |
| 965       | ncDR                                     | 2017              | 1                    | 0        | 0 |

|      | <b>Tool Name</b> | <b>Latest Publication Year</b> | <b>Publication Count</b> | <b>Total Citation Count</b> | <b>Pagerank</b> |
|------|------------------|--------------------------------|--------------------------|-----------------------------|-----------------|
| 966  | dreamBase        | 2017                           | 1                        | 0                           | 0               |
| 967  | MicroTarget      | 2017                           | 1                        | 0                           | 0               |
| 968  | TissGDB          | 2017                           | 1                        | 0                           | 0               |
| 969  | PheLiM           | 2017                           | 1                        | 0                           | 0               |
| 970  | OncomiR          | 2017                           | 1                        | 0                           | 0               |
| 971  | EVLncRNAs        | 2017                           | 1                        | 0                           | 0               |
| 972  | deepboost        | 2017                           | 1                        | 0                           | 0               |
| 973  | MMCOP            | 2017                           | 1                        | 0                           | 0               |
| 974  | miRandb          | 2017                           | 1                        | 0                           | 0               |
| 975  | RNA Editing Plus | 2017                           | 1                        | 0                           | 0               |
| 976  | SeRPeNT          | 2017                           | 1                        | 0                           | 0               |
| 977  | miRTarVis+       | 2017                           | 1                        | 0                           | 0               |
| 978  | TarHunter        | 2017                           | 1                        | 0                           | 0               |
| 979  | BioSeq-Analysis  | 2017                           | 1                        | 0                           | 0               |
| 980  | ParSel           | 2017                           | 1                        | 0                           | 0               |
| 981  | deepSOM          | 2017                           | 1                        | 0                           | 0               |
| 982  | iJRF             | 2017                           | 1                        | 0                           | 0               |
| 983  | AtCircDB         | 2017                           | 1                        | 0                           | 0               |
| 984  | GRNMF            | 2017                           | 1                        | 0                           | 0               |
| 985  | DPMIND           | 2017                           | 1                        | 0                           | 0               |
| 986  | bloodmiRs        | 2017                           | 1                        | 0                           | 0               |
| 987  | ChemoCommunity   | 2017                           | 1                        | 0                           | 0               |
| 988  | m6AVar           | 2017                           | 1                        | 0                           | 0               |
| 989  | MotifMap-RNA     | 2017                           | 1                        | 0                           | 0               |
| 990  | FMIGS            | 2017                           | 1                        | 0                           | 0               |
| 991  | mirTrans         | 2017                           | 1                        | 0                           | 0               |
| 992  | EPLMI            | 2017                           | 1                        | 0                           | 0               |
| 993  | DMPred           | 2017                           | 1                        | 0                           | 0               |
| 994  | Wgssat           | 2017                           | 1                        | 0                           | 0               |
| 995  | MLSeq            | 2017                           | 1                        | 0                           | 0               |
| 996  | mirSTP           | 2017                           | 1                        | 0                           | 0               |
| 997  | microRPM         | 2017                           | 1                        | 0                           | 0               |
| 998  | lncRInter        | 2017                           | 1                        | 0                           | 0               |
| 999  | ICG              | 2017                           | 1                        | 0                           | 0               |
| 1000 | miRCarta         | 2017                           | 1                        | 0                           | 0               |
| 1001 | miRNAss          | 2017                           | 1                        | 0                           | 0               |
| 1002 | CCmiR            | 2017                           | 1                        | 0                           | 0               |
| 1003 | miRDis           | 2017                           | 1                        | 0                           | 0               |
| 1004 | miRPursuit       | 2017                           | 1                        | 0                           | 0               |
| 1005 | MSDD             | 2017                           | 1                        | 0                           | 0               |
| 1006 | CR2Cancer        | 2017                           | 1                        | 0                           | 0               |
| 1007 | IMOTA            | 2017                           | 1                        | 0                           | 0               |
| 1008 | Tools4miRs       | 2016                           | 1                        | 0                           | 0               |
| 1009 | dbPHCC           | 2016                           | 1                        | 0                           | 0               |

|      | <b>Tool Name</b>                         | <b>Latest Publication Year</b> | <b>Publication Count</b> | <b>Total Citation Count</b> | <b>Pagerank</b> |
|------|------------------------------------------|--------------------------------|--------------------------|-----------------------------|-----------------|
| 1010 | TF--miRNA                                | 2016                           | 1                        | 0                           | 0               |
| 1011 | FMIMS                                    | 2016                           | 1                        | 0                           | 0               |
| 1012 | plantMirP                                | 2016                           | 1                        | 0                           | 0               |
| 1013 | pirnaPre                                 | 2016                           | 1                        | 0                           | 0               |
| 1014 | FREM                                     | 2016                           | 1                        | 0                           | 0               |
| 1015 | miRQuest                                 | 2016                           | 1                        | 0                           | 0               |
| 1016 | BiCliques Merging                        | 2016                           | 1                        | 0                           | 0               |
| 1017 | miRNA-Analyzer                           | 2016                           | 1                        | 0                           | 0               |
| 1018 | SignaFish                                | 2016                           | 1                        | 0                           | 0               |
| 1019 | MULSEA                                   | 2016                           | 1                        | 0                           | 0               |
| 1020 | MicRooN                                  | 2015                           | 1                        | 0                           | 0               |
| 1021 | YamiPred                                 | 2015                           | 1                        | 0                           | 0               |
| 1022 | MDTE DB                                  | 2015                           | 1                        | 0                           | 0               |
| 1023 | ORCA                                     | 2015                           | 1                        | 0                           | 0               |
| 1024 | iBFE                                     | 2015                           | 1                        | 0                           | 0               |
| 1025 | iScreen                                  | 2015                           | 1                        | 0                           | 0               |
| 1026 | Functional interpretation of microRNA-   | 2014                           | 1                        | 0                           | 0               |
| 1027 | miRAFinder and GeneAFinder scripts       | 2014                           | 1                        | 0                           | 0               |
| 1028 | BosFinder                                | 2014                           | 1                        | 0                           | 0               |
| 1029 | application in consensus ranking of micr | 2013                           | 1                        | 0                           | 0               |
| 1030 | miMsg                                    | 2013                           | 1                        | 0                           | 0               |
| 1031 | RiceChip                                 | 2010                           | 1                        | 0                           | 0               |
| 1032 | webFOG                                   | 2010                           | 1                        | 0                           | 0               |
| 1033 | ncRNAppi                                 | 2009                           | 1                        | 0                           | 0               |
| 1034 | EGs                                      | 2008                           | 1                        | 0                           | 0               |
| 1035 | MiRE                                     | 2008                           | 1                        | 0                           | 0               |
| 1036 | OligoMatcher                             | 2006                           | 1                        | 0                           | 0               |

**The order priority is PageRank, Total Citation Count, Publication Count, and then Latest Publication Year.**
